# Supplementary material for: Robust Gene Expression Signature from Formalin-Fixed Paraffin-Embedded Samples Predicts Prognosis of Non–Small-Cell Lung Cancer Patients
Source: Oxford University Press journal article supplement (doi:10.1158/1078-0432.ccr-11-0196), 2011-07-08

# Robust mRNA Gene Signature from Formalin Fixed Paraffin Embedded Samples Predicts Prognosis of Lung Cancer Patients

Yang Xie et al.

Supplementary Figure 1.

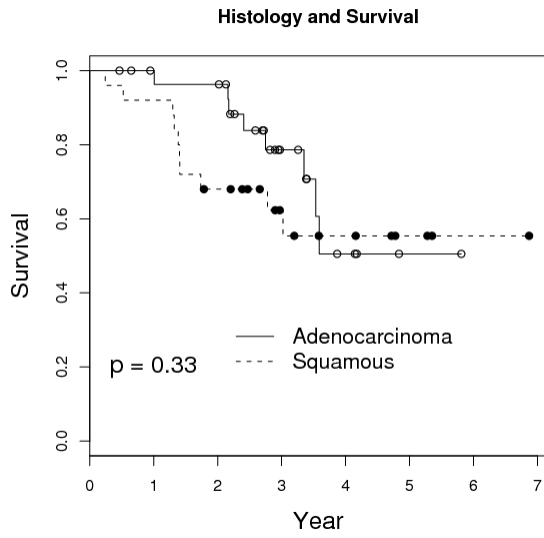

(A)

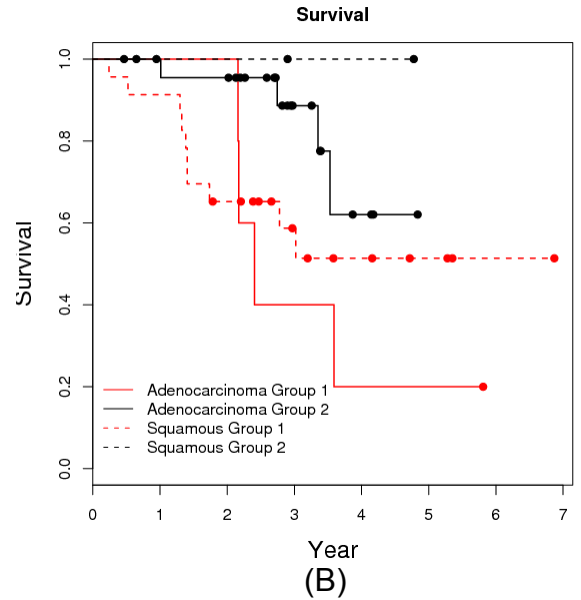

(B)

## Supplementary Figure 2.

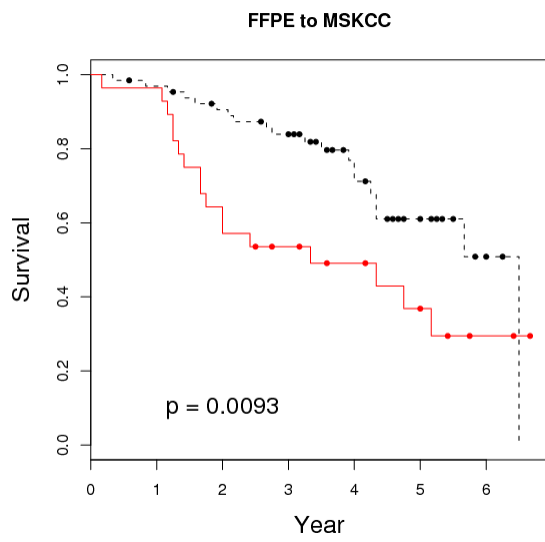

(A)

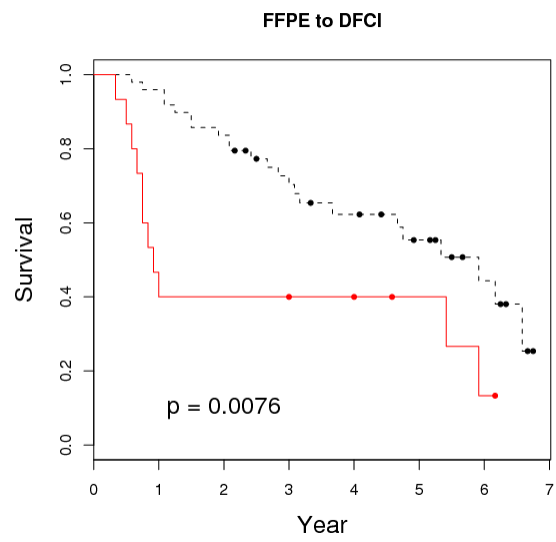

(B)

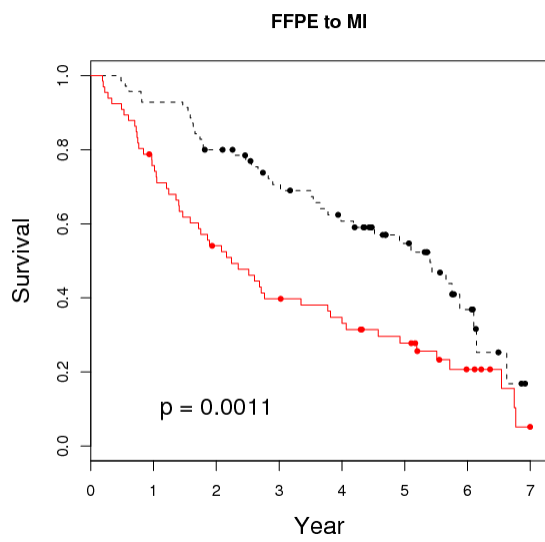

(C)

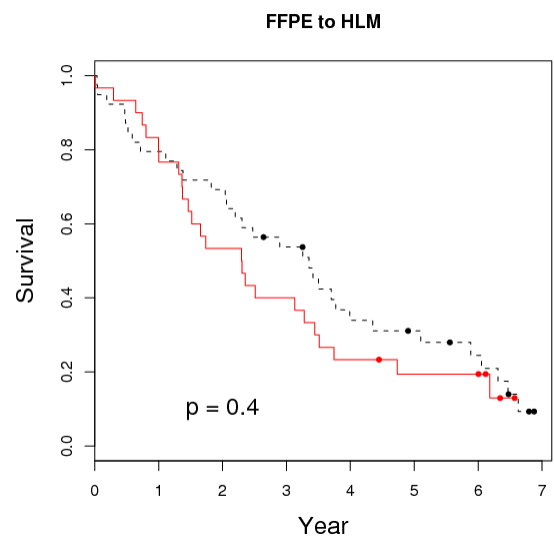

(D)

### Supplementary Figure 3.

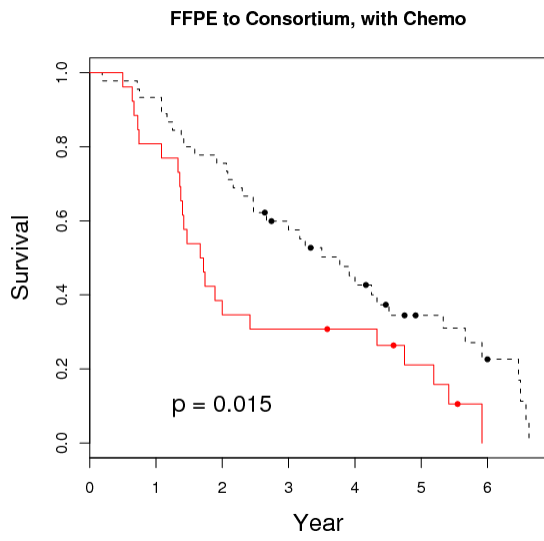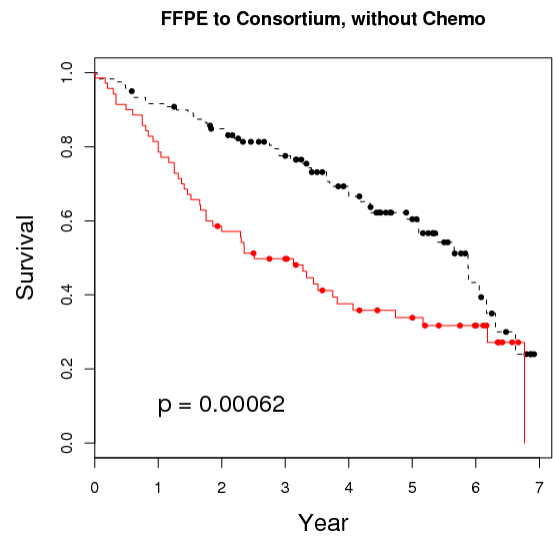

# Supplementary Figure 4.

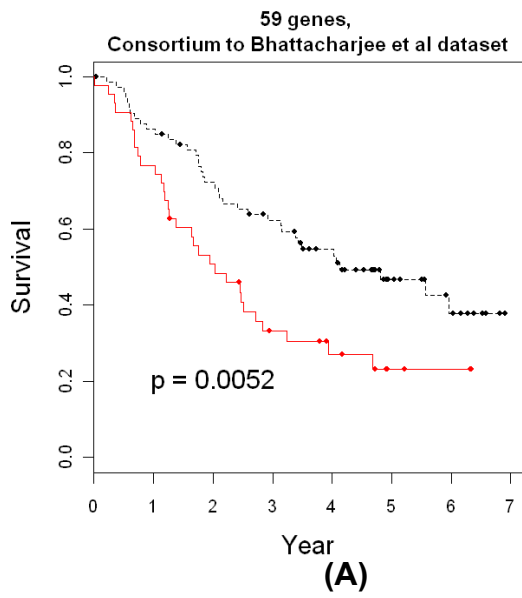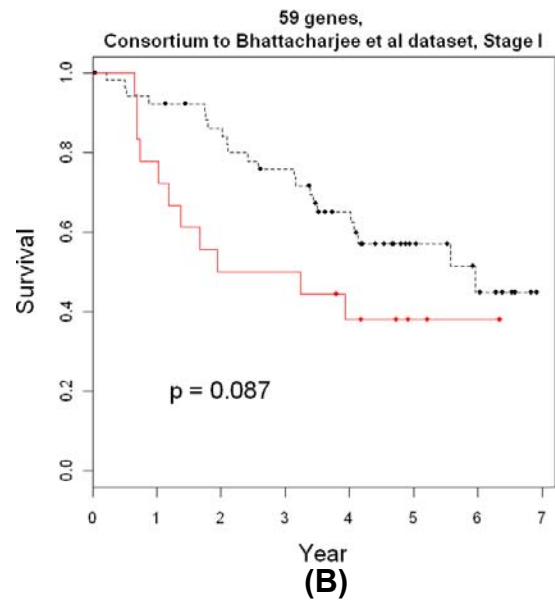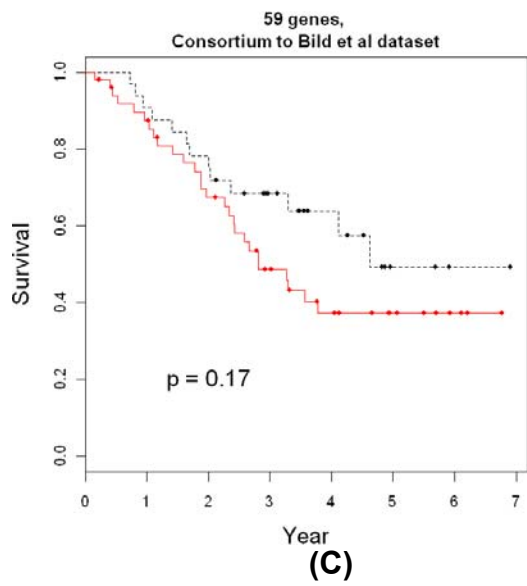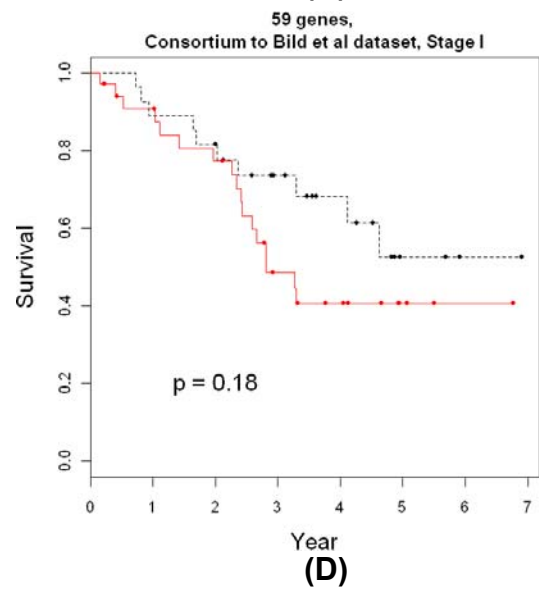

Supplement: 10780432ccr110196-sup-f4_pdf_148k.pdf [file 10780432ccr110196-sup-f4_pdf_148k.pdf]
