# Supplementary material for: Robust Gene Expression Signature from Formalin-Fixed Paraffin-Embedded Samples Predicts Prognosis of Non–Small-Cell Lung Cancer Patients
Source: Oxford University Press journal article supplement (doi:10.1158/1078-0432.ccr-11-0196), 2011-07-08
Supplement: 10780432ccr110196-sup-sweave_report_pdf_315k.pdf [file 10780432ccr110196-sup-sweave_report_pdf_315k.pdf]

# Computing MAS5 Present/Absent Calls

## 1 Introduction

This report describes the first step in the analysis of 75 experiments performed by Response Genetics for the Lung SPORE/DOD projects. All samples came from formalin-fixed paraffin-embedded (FFPE) samples of lung cancer.

In this particular report, we simply compute the MAS5 expression and present/absent calls.

## 2 MAS5 Computations

We use these libraries:

```
> library(simpleaffy)
> library(affy)
```

### 2.1 Data Storage and Memory Management

We start working in the following directory:

```
> getwd()

[1] "C:/Documents and Settings/GXIA0/Desktop/FFPE Fit Sweave 0315 2010"
```

All CEL files have been placed in the same working directory

```
> celpath <- file.path(".", "CELfile")
> fileNames <- list.celfiles(celpath)
```

We set aside as much RAM as possible for the R process.

```
> memory.limit(size = 4000)
```

NULL

Because the MAS5 computations require reading everything into RAM as an `AffyBatch` object, we need to work things out in batches. The following `kluge` works around this difficulty.

```
> kluge <- function(a, b) {
+   fnames <- file.path(celpath, fileNames[a:b])
+   data <- read.affybatch(fnames)
+   x.mas <- call.exprs(data, "mas5")
+   calls <- mas5calls(data)
```

```

+   write.exprs(x.mas, file = file.path(".", "Output", paste("mas5_",
+     a, "_", b, ".txt", sep = "")))
+   write.exprs(calls, file = file.path(".", "Output", paste("mas5_call_",
+     a, "_", b, ".txt", sep = "")))
+   qcs <- qc(data, x.mas)
+   qc.out <- data.frame(scale = qcs@scale.factors, percent.present = qcs@percent.present,
+     average.background = qcs@average.background, minimum.background = qcs@minimum.background,
+     maximum.background = qcs@maximum.background, qcs@spikes, qcs@qc.probes)
+   write.csv(qc.out, file = file.path(".", "Output", paste("qc_",
+     a, "_", b, ".csv", sep = "")), row.names = TRUE)
+ }

```

## 2.2 The Actual Computations

Now we manually run through computing the MAS5 calls twenty arrays at a time.

```
> kluge(1, 20)
```

Getting probe level data...

Computing p-values

Making P/M/A Calls

```
> gc()
```

|        | used (Mb)    | gc trigger (Mb) | max used (Mb)   |
|--------|--------------|-----------------|-----------------|
| Ncells | 1081660 28.9 | 3962908 105.9   | 4953636 132.3   |
| Vcells | 1877674 14.4 | 81083053 618.7  | 115069044 878.0 |

```
> memory.size()
```

```
[1] 61.31004
```

```
> kluge(21, 40)
```

Getting probe level data...

Computing p-values

Making P/M/A Calls

```
> gc()
```

|        | used (Mb)    | gc trigger (Mb) | max used (Mb)   |
|--------|--------------|-----------------|-----------------|
| Ncells | 1081683 28.9 | 3616491 96.6    | 4953636 132.3   |
| Vcells | 1877700 14.4 | 92750712 707.7  | 117337694 895.3 |

```
> memory.size()
```

```
[1] 173.5549
```

```
> kluge(41, 60)
```

Getting probe level data...

Computing p-values

Making P/M/A Calls

```
> gc()

      used (Mb) gc trigger (Mb) max used (Mb)
Ncells 1081687 28.9   3654615  97.6   4953636 132.3
Vcells 1877717 14.4   92750727 707.7 117365293 895.5
```

```
> memory.size()
```

```
[1] 168.4987
```

```
> kluge(61, 75)
```

```
Getting probe level data...
Computing p-values
Making P/M/A Calls
```

```
> gc()
```

```
      used (Mb) gc trigger (Mb) max used (Mb)
Ncells 1081691 28.9   3908271 104.4   4953636 132.3
Vcells 1877739 14.4   63986947 488.2 117365293 895.5
```

```
> memory.size()
```

```
[1] 61.31732
```

### 3 Appendix

This computation was performed in the following environment:

```
> sessionInfo()
```

```
R version 2.6.1 (2007-11-26)
i386-pc-mingw32
```

```
locale:
```

```
LC_COLLATE=English_United States.1252;LC_CTYPE=English_United States.1252;LC_MONETARY=English_United States.1252
```

```
attached base packages:
```

```
[1] splines  tools      stats      graphics  grDevices  utils      datasets  methods
[9] base
```

```
other attached packages:
```

```
[1] hgu133plus2cdf_2.0.0 simpleaffy_2.14.05  gcrma_2.10.0      matchprobes_1.10.0
[5] genefilter_1.16.0   survival_2.34      affy_1.14.2       affyio_1.4.1
[9] Biobase_1.16.1
```

```
loaded via a namespace (and not attached):
```

```
[1] annotate_1.14.1      AnnotationDbi_1.0.6 DBI_0.2-4          RSQLite_0.7-1
```

# Quality Control of the Response Genetics Data

## 1 Introduction

This report describes the second step in the analysis of 75 FFPE Affymetrix experiments performed by Response Genetics for the Lung SPORE/DOD projects.

In this particular report, we use quality control metrics to reduce the number of genes and arrays under consideration.

## 2 Reading the Quality Control Metrics

We use these libraries:

```
> library(simpleaffy)
> library(affy)
```

The quality control metrics were computed in the first report (step01-MAS5). Here we read them into R.

```
> qcs1 <- read.csv(file.path(".", "Output", "qc_1_20.csv"))
> qcs2 <- read.csv(file.path(".", "Output", "qc_21_40.csv"))
> qcs3 <- read.csv(file.path(".", "Output", "qc_41_60.csv"))
> qcs4 <- read.csv(file.path(".", "Output", "qc_61_75.csv"))
```

Now we combine the QC values into a single structure.

```
> qc.all <- rbind(qcs1, qcs2, qcs3, qcs4)
> rm(qcs1, qcs2, qcs3, qcs4)
> write.csv(qc.all, file = file.path(".", "Output", "qc_all.csv"), row.names = FALSE)
```

Next, we read the same data back in, using the first column to supply row names.

```
> qc.all <- read.csv(file.path(".", "Output", "qc_all.csv"), row.names = 1)
> qc.all[1:6, 1:3]
```

|                       | scale    | percent.present | average.background |
|-----------------------|----------|-----------------|--------------------|
| AGR08-562.CEL.present | 9.142070 | 14.924554       | 64.24909           |
| AGR08-563.CEL.present | 7.711865 | 9.733882        | 87.86460           |
| AGR08-564.CEL.present | 4.034480 | 16.932785       | 103.96073          |
| AGR08-565.CEL.present | 7.191250 | 8.074989        | 121.73156          |
| AGR08-566.CEL.present | 9.117584 | 7.860997        | 97.36753           |
| AGR08-567.CEL.present | 6.276735 | 20.040238       | 70.77899           |

We can clearly simplify the row names.

```
> rownames(qc.all) <- substr(rownames(qc.all), 1, 9)
> qc.all[1:6, 1:4]
```

|           | scale    | percent.present | average.background | minimum.background |
|-----------|----------|-----------------|--------------------|--------------------|
| AGR08-562 | 9.142070 | 14.924554       | 64.24909           | 61.21925           |
| AGR08-563 | 7.711865 | 9.733882        | 87.86460           | 83.11230           |
| AGR08-564 | 4.034480 | 16.932785       | 103.96073          | 98.11364           |
| AGR08-565 | 7.191250 | 8.074989        | 121.73156          | 115.24502          |
| AGR08-566 | 9.117584 | 7.860997        | 97.36753           | 91.17045           |
| AGR08-567 | 6.276735 | 20.040238       | 70.77899           | 67.44786           |

### 3 Some Clinical Annotations

We next read some clinical information about the samples.

```
> date <- read.csv("date.csv")
> dim(date)
```

```
[1] 120 5
```

```
> head(date)
```

|   | MDACC.Specimen.Number | Date.of.Surgery | Now      | day360 | year     |
|---|-----------------------|-----------------|----------|--------|----------|
| 1 | MDA1                  | 8/5/2005        | 8/1/2008 | 1076   | 2.947945 |
| 2 | MDA10                 | 3/18/2005       | 8/1/2008 | 1213   | 3.323288 |
| 3 | MDA100                | 10/6/1999       | 8/1/2008 | 3175   | 8.698630 |
| 4 | MDA101                | 9/3/1999        | 8/1/2008 | 3208   | 8.789041 |
| 5 | MDA102                | 12/15/1999      | 8/1/2008 | 3106   | 8.509589 |
| 6 | MDA103                | 8/5/1999        | 8/1/2008 | 3236   | 8.865753 |

```
> ID <- read.csv("ID.csv")
> dim(ID)
```

```
[1] 75 2
```

```
> head(ID)
```

|   | Specimen.Number | Chip.ID   |
|---|-----------------|-----------|
| 1 | MDA3            | AGR08-562 |
| 2 | MDA4            | AGR08-563 |
| 3 | MDA5            | AGR08-564 |
| 4 | MDA6            | AGR08-565 |
| 5 | MDA7            | AGR08-566 |
| 6 | MDA9            | AGR08-567 |

Clearly, the first file maps the MDA specimen number to some survival information, while the second file maps the MDA specimen number to the CEL file. We can now merge these into a single structure.

```
> date <- merge(ID, date, by.x = "Specimen.Number", by.y = "MDACC.Specimen.Number")
> dim(date)
```

```
[1] 75 6
```

```
> head(date)
```

|   | Specimen.Number | Chip.ID   | Date.of.Surgery | Now      | day360 | year     |
|---|-----------------|-----------|-----------------|----------|--------|----------|
| 1 | MDA10           | AGR08-568 | 3/18/2005       | 8/1/2008 | 1213   | 3.323288 |
| 2 | MDA109          | AGR08-661 | 2/27/2001       | 8/1/2008 | 2674   | 7.326027 |
| 3 | MDA11           | AGR08-569 | 4/19/2005       | 8/1/2008 | 1182   | 3.238356 |
| 4 | MDA111          | AGR08-663 | 3/1/2001        | 8/1/2008 | 2670   | 7.315068 |
| 5 | MDA114          | AGR08-666 | 5/25/2001       | 8/1/2008 | 2586   | 7.084932 |
| 6 | MDA117          | AGR08-669 | 7/26/2001       | 8/1/2008 | 2525   | 6.917808 |

The next step is to merge the clinical annotations with the quality control measures on the CEL files.

```
> out <- merge(date, qc.all, by.x = "Chip.ID", by.y = "row.names")
```

```
> dim(out)
```

```
[1] 75 21
```

```
> head(out)
```

|   | Chip.ID   | Specimen.Number | Date.of.Surgery           | Now                       | day360                    | year                | scale    |
|---|-----------|-----------------|---------------------------|---------------------------|---------------------------|---------------------|----------|
| 1 | AGR08-562 | MDA3            | 7/21/2005                 | 8/1/2008                  | 1090                      | 2.986301            | 9.142070 |
| 2 | AGR08-563 | MDA4            | 7/1/2005                  | 8/1/2008                  | 1110                      | 3.041096            | 7.711865 |
| 3 | AGR08-564 | MDA5            | 7/18/2005                 | 8/1/2008                  | 1093                      | 2.994521            | 4.034480 |
| 4 | AGR08-565 | MDA6            | 5/20/2005                 | 8/1/2008                  | 1151                      | 3.153425            | 7.191250 |
| 5 | AGR08-566 | MDA7            | 4/27/2005                 | 8/1/2008                  | 1174                      | 3.216438            | 9.117584 |
| 6 | AGR08-567 | MDA9            | 4/28/2005                 | 8/1/2008                  | 1173                      | 3.213699            | 6.276735 |
|   |           |                 | percent.present           | average.background        | minimum.background        | maximum.background  |          |
| 1 |           |                 | 14.924554                 | 64.24909                  | 61.21925                  | 65.76459            |          |
| 2 |           |                 | 9.733882                  | 87.86460                  | 83.11230                  | 90.60596            |          |
| 3 |           |                 | 16.932785                 | 103.96073                 | 98.11364                  | 107.65860           |          |
| 4 |           |                 | 8.074989                  | 121.73156                 | 115.24502                 | 130.46763           |          |
| 5 |           |                 | 7.860997                  | 97.36753                  | 91.17045                  | 101.52322           |          |
| 6 |           |                 | 20.040238                 | 70.77899                  | 67.44786                  | 73.57750            |          |
|   |           |                 | AFFX.r2.Ec.bioB.3_at      | AFFX.r2.Ec.bioC.3_at      | AFFX.r2.Ec.bioD.3_at      | AFFX.r2.P1.cre.3_at |          |
| 1 |           |                 | 11.94451                  | 13.46356                  | 15.44630                  | 16.95217            |          |
| 2 |           |                 | 10.81255                  | 12.99849                  | 15.02482                  | 16.52847            |          |
| 3 |           |                 | 9.97492                   | 11.95150                  | 13.77272                  | 15.53087            |          |
| 4 |           |                 | 10.87180                  | 12.75666                  | 14.89362                  | 16.41770            |          |
| 5 |           |                 | 10.98516                  | 13.18725                  | 15.26179                  | 16.71391            |          |
| 6 |           |                 | 11.09174                  | 12.87277                  | 14.75510                  | 16.39212            |          |
|   |           |                 | AFFX.HSAC07.X00351_3_at   | AFFX.HSAC07.X00351_5_at   | AFFX.HSAC07.X00351_M_at   |                     |          |
| 1 |           |                 | 11.47109                  | 6.865734                  | 5.208003                  |                     |          |
| 2 |           |                 | 10.96383                  | 7.186255                  | 7.415933                  |                     |          |
| 3 |           |                 | 11.48040                  | 6.101688                  | 4.982652                  |                     |          |
| 4 |           |                 | 10.52984                  | 7.246127                  | 5.986817                  |                     |          |
| 5 |           |                 | 10.98318                  | 7.605745                  | 7.718577                  |                     |          |
| 6 |           |                 | 11.80284                  | 6.529268                  | 3.897452                  |                     |          |
|   |           |                 | AFFX.HUMGAPDH.M33197_3_at | AFFX.HUMGAPDH.M33197_5_at | AFFX.HUMGAPDH.M33197_M_at |                     |          |

|   |           |          |          |
|---|-----------|----------|----------|
| 1 | 9.327008  | 6.043686 | 5.933223 |
| 2 | 10.568375 | 7.355697 | 5.417545 |
| 3 | 11.587130 | 6.766997 | 6.909541 |
| 4 | 10.812368 | 7.659383 | 5.812756 |
| 5 | 10.869056 | 6.381063 | 5.873258 |
| 6 | 9.024217  | 6.724048 | 5.616518 |

Now we save this combined annotation information into a file.

```
> rm(date, ID)
> write.csv(out, file.path(".", "Output", "qc.csv"), row.names = FALSE)
```

In order to get the row names re-attached, we use the previous trick of reading the same data back in.

```
> qc <- read.csv(file.path(".", "Output", "qc.csv"), row.names = 1)
> head(qc)
```

|           | Specimen.Number         | Date.of.Surgery           | Now                       | day360             | year     | scale    |
|-----------|-------------------------|---------------------------|---------------------------|--------------------|----------|----------|
| AGRO8-562 | MDA3                    | 7/21/2005                 | 8/1/2008                  | 1090               | 2.986301 | 9.142070 |
| AGRO8-563 | MDA4                    | 7/1/2005                  | 8/1/2008                  | 1110               | 3.041096 | 7.711865 |
| AGRO8-564 | MDA5                    | 7/18/2005                 | 8/1/2008                  | 1093               | 2.994521 | 4.034480 |
| AGRO8-565 | MDA6                    | 5/20/2005                 | 8/1/2008                  | 1151               | 3.153425 | 7.191250 |
| AGRO8-566 | MDA7                    | 4/27/2005                 | 8/1/2008                  | 1174               | 3.216438 | 9.117584 |
| AGRO8-567 | MDA9                    | 4/28/2005                 | 8/1/2008                  | 1173               | 3.213699 | 6.276735 |
|           | percent.present         | average.background        | minimum.background        | maximum.background |          |          |
| AGRO8-562 | 14.924554               | 64.24909                  | 61.21925                  | 65.76459           |          |          |
| AGRO8-563 | 9.733882                | 87.86460                  | 83.11230                  | 90.60596           |          |          |
| AGRO8-564 | 16.932785               | 103.96073                 | 98.11364                  | 107.65860          |          |          |
| AGRO8-565 | 8.074989                | 121.73156                 | 115.24502                 | 130.46763          |          |          |
| AGRO8-566 | 7.860997                | 97.36753                  | 91.17045                  | 101.52322          |          |          |
| AGRO8-567 | 20.040238               | 70.77899                  | 67.44786                  | 73.57750           |          |          |
|           | AFFX.r2.Ec.bioB.3_at    | AFFX.r2.Ec.bioC.3_at      | AFFX.r2.Ec.bioD.3_at      |                    |          |          |
| AGRO8-562 | 11.94451                | 13.46356                  | 15.44630                  |                    |          |          |
| AGRO8-563 | 10.81255                | 12.99849                  | 15.02482                  |                    |          |          |
| AGRO8-564 | 9.97492                 | 11.95150                  | 13.77272                  |                    |          |          |
| AGRO8-565 | 10.87180                | 12.75666                  | 14.89362                  |                    |          |          |
| AGRO8-566 | 10.98516                | 13.18725                  | 15.26179                  |                    |          |          |
| AGRO8-567 | 11.09174                | 12.87277                  | 14.75510                  |                    |          |          |
|           | AFFX.r2.P1.cre.3_at     | AFFX.HSAC07.X00351_3_at   | AFFX.HSAC07.X00351_5_at   |                    |          |          |
| AGRO8-562 | 16.95217                | 11.47109                  | 6.865734                  |                    |          |          |
| AGRO8-563 | 16.52847                | 10.96383                  | 7.186255                  |                    |          |          |
| AGRO8-564 | 15.53087                | 11.48040                  | 6.101688                  |                    |          |          |
| AGRO8-565 | 16.41770                | 10.52984                  | 7.246127                  |                    |          |          |
| AGRO8-566 | 16.71391                | 10.98318                  | 7.605745                  |                    |          |          |
| AGRO8-567 | 16.39212                | 11.80284                  | 6.529268                  |                    |          |          |
|           | AFFX.HSAC07.X00351_M_at | AFFX.HUMGAPDH.M33197_3_at | AFFX.HUMGAPDH.M33197_5_at |                    |          |          |
| AGRO8-562 | 5.208003                | 9.327008                  | 6.043686                  |                    |          |          |
| AGRO8-563 | 7.415933                | 10.568375                 | 7.355697                  |                    |          |          |
| AGRO8-564 | 4.982652                | 11.587130                 | 6.766997                  |                    |          |          |
| AGRO8-565 | 5.986817                | 10.812368                 | 7.659383                  |                    |          |          |

|                           |          |           |          |
|---------------------------|----------|-----------|----------|
| AGR08-566                 | 7.718577 | 10.869056 | 6.381063 |
| AGR08-567                 | 3.897452 | 9.024217  | 6.724048 |
| AFFX.HUMGAPDH.M33197_M_at |          |           |          |
| AGR08-562                 | 5.933223 |           |          |
| AGR08-563                 | 5.417545 |           |          |
| AGR08-564                 | 6.909541 |           |          |
| AGR08-565                 | 5.812756 |           |          |
| AGR08-566                 | 5.873258 |           |          |
| AGR08-567                 | 5.616518 |           |          |

## 4 Gene Information

We read the gene information from a file. This file maps Affymetrix probe set IDs to GenBank accession numbers.

```
> gene.info <- read.csv("gene_info.csv")
> dim(gene.info)

[1] 54675    3

> head(gene.info)
```

|   | Affy.ID         | Accession | Symbol |
|---|-----------------|-----------|--------|
| 1 | AFFX-BioB-5_at  | J04423    |        |
| 2 | AFFX-BioB-M_at  | U00096    |        |
| 3 | AFFX-BioB-3_at  | U00096    |        |
| 4 | AFFX-BioC-5_at  | U00096    |        |
| 5 | AFFX-BioC-3_at  | J04423    |        |
| 6 | AFFX-BioDn-5_at | U00096    |        |

## 5 Affymetrix Present/Absent Calls

In the previous report, we computed the Affymetrix present/absent calls for each probe set in each sample. Here we read that information back into R.

```
> c1 <- read.table(file.path(".", "Output", "mas5_call_1_20.txt"), sep = "\t",
+   row.names = 1, head = TRUE)
> c2 <- read.table(file.path(".", "Output", "mas5_call_21_40.txt"), sep = "\t",
+   row.names = 1, head = TRUE)
> c3 <- read.table(file.path(".", "Output", "mas5_call_41_60.txt"), sep = "\t",
+   row.names = 1, head = TRUE)
> c4 <- read.table(file.path(".", "Output", "mas5_call_61_75.txt"), sep = "\t",
+   row.names = 1, head = TRUE)
```

As before, we combine this information into a single structure.

```
> call <- data.frame(c1, c2, c3, c4)
> head(call, 2)
```



|           |               |               |               |               |               |
|-----------|---------------|---------------|---------------|---------------|---------------|
|           | AGR08.562.CEL | AGR08.563.CEL | AGR08.564.CEL | AGR08.565.CEL | AGR08.566.CEL |
| 1007_s_at | P             | A             | P             | A             | A             |
| 1053_at   | A             | A             | A             | A             | A             |
|           | AGR08.567.CEL | AGR08.568.CEL | AGR08.569.CEL | AGR08.570.CEL | AGR08.571.CEL |
| 1007_s_at | P             | P             | A             | P             | P             |
| 1053_at   | A             | A             | A             | A             | A             |
|           | AGR08.572.CEL | AGR08.573.CEL | AGR08.574.CEL | AGR08.575.CEL | AGR08.576.CEL |
| 1007_s_at | P             | P             | P             | P             | P             |
| 1053_at   | A             | A             | A             | A             | A             |
|           | AGR08.577.CEL | AGR08.579.CEL | AGR08.580.CEL | AGR08.581.CEL | AGR08.582.CEL |
| 1007_s_at | P             | P             | P             | P             | P             |
| 1053_at   | A             | A             | A             | A             | A             |
|           | AGR08.583.CEL | AGR08.584.CEL | AGR08.586.CEL | AGR08.588.CEL | AGR08.589.CEL |
| 1007_s_at | P             | P             | P             | P             | P             |
| 1053_at   | A             | A             | A             | A             | A             |
|           | AGR08.591.CEL | AGR08.593.CEL | AGR08.595.CEL | AGR08.596.CEL | AGR08.597.CEL |
| 1007_s_at | P             | P             | P             | P             | P             |
| 1053_at   | A             | A             | A             | A             | A             |
|           | AGR08.598.CEL | AGR08.599.CEL | AGR08.600.CEL | AGR08.601.CEL | AGR08.602.CEL |
| 1007_s_at | P             | P             | P             | P             | P             |
| 1053_at   | A             | A             | A             | A             | A             |
|           | AGR08.603.CEL | AGR08.604.CEL | AGR08.605.CEL | AGR08.606.CEL | AGR08.607.CEL |
| 1007_s_at | P             | P             | P             | P             | P             |
| 1053_at   | A             | A             | A             | A             | A             |
|           | AGR08.608.CEL | AGR08.609.CEL | AGR08.610.CEL | AGR08.612.CEL | AGR08.613.CEL |
| 1007_s_at | P             | P             | P             | P             | P             |
| 1053_at   | A             | A             | A             | A             | A             |
|           | AGR08.614.CEL | AGR08.615.CEL | AGR08.616.CEL | AGR08.617.CEL | AGR08.618.CEL |
| 1007_s_at | P             | P             | P             | P             | P             |
| 1053_at   | A             | A             | A             | A             | A             |
|           | AGR08.620.CEL | AGR08.621.CEL | AGR08.622.CEL | AGR08.623.CEL | AGR08.625.CEL |
| 1007_s_at | P             | P             | P             | P             | P             |
| 1053_at   | A             | A             | A             | A             | A             |
|           | AGR08.626.CEL | AGR08.627.CEL | AGR08.629.CEL | AGR08.630.CEL | AGR08.631.CEL |
| 1007_s_at | M             | P             | P             | P             | P             |
| 1053_at   | A             | A             | A             | A             | A             |
|           | AGR08.633.CEL | AGR08.634.CEL | AGR08.635.CEL | AGR08.637.CEL | AGR08.638.CEL |
| 1007_s_at | P             | P             | P             | P             | P             |
| 1053_at   | A             | A             | A             | A             | A             |
|           | AGR08.640.CEL | AGR08.641.CEL | AGR08.643.CEL | AGR08.644.CEL | AGR08.648.CEL |
| 1007_s_at | P             | P             | P             | P             | P             |
| 1053_at   | A             | A             | A             | A             | A             |
|           | AGR08.661.CEL | AGR08.663.CEL | AGR08.666.CEL | AGR08.669.CEL | AGR08.672.CEL |
| 1007_s_at | P             | P             | P             | P             | P             |
| 1053_at   | A             | A             | A             | A             | A             |

For various purposes, it will be easier to recode the calls numerically.

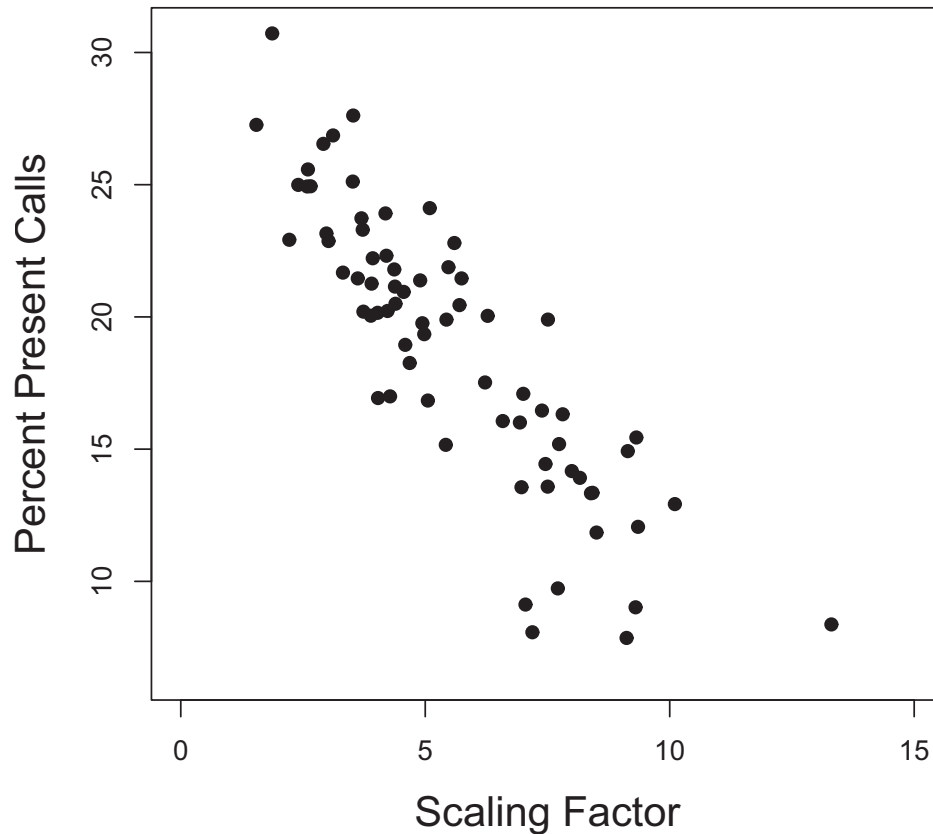

Figure 1: Scatter plot of the MAS5 scaling factors and percent present calls on the CEL files.

```
> to.numeric <- function(x) {
+   ifelse(x == "A", 0, 1)
+ }
> call <- to.numeric(call)
> id <- data.frame(qc[, c(1, 7)], colnames(call))
```

Now we start exploring the QC data. Figure 1 shows that the percentage of present calls on an array is negatively correlated with its scaling factor. Arrays with larger scaling factors (because the overall brightness is low) have fewer genes that are called present. We also note that the percentage of present calls is well below the usual range of 30% to 60% that we typically see when using fresh frozen samples; the difference is almost certainly explained by RNA degradation of the FFPE samples.

We decide (more or less arbitrarily) to ignore arrays on which at most 15% of the genes are called present.

```
> ind.array <- which(id$percent.present > 15)
```

That will leave only 55 CEL files for use in our further analyses.

Now we look at the present/absent calls for individual probe sets. The next piece of code computes, for each gene, the percentage of times it is called present among the QC-selected arrays. The results are summarized in Figure 2.

```
> call.selected <- call[, ind.array]
> rate <- apply(call.selected, 1, mean)
> length(which(rate == 1))
```

```
[1] 1804
```

```
> sum(rate > 0.5)
```

```
[1] 10778
```

```
> sum(rate > 0.05)
```

```
[1] 29108
```

We again arbitrarily decide that we will only consider probe sets that are called present in all of the QC-selected samples.

```
> dat.selected <- call[rate == 1, ind.array]
> dim(dat.selected)
```

```
[1] 1804 55
```

```
> dat.selected <- merge(gene.info, dat.selected, by.x = "Affy.ID", by.y = "row.names")
> nblank <- length(which(dat.selected$Symbol == ""))
> nsel <- nrow(dat.selected) - nblank
> nblank
```

```
[1] 404
```

Data for the 1400 selected genes are now saved in anticipation of the next step in the analysis.

```
> write.csv(dat.selected[dat.selected$Symbol != "", ], file.path(".",
+ "Output", "dat.selected.csv"), row.names = FALSE)
```

## 6 Appendix

This computation was performed in the following environment:

```
> sessionInfo()
```

```
R version 2.6.1 (2007-11-26)
i386-pc-mingw32
```

```
locale:
```

```
LC_COLLATE=English_United States.1252;LC_CTYPE=English_United States.1252;LC_MONETARY=English_United States.1252
```

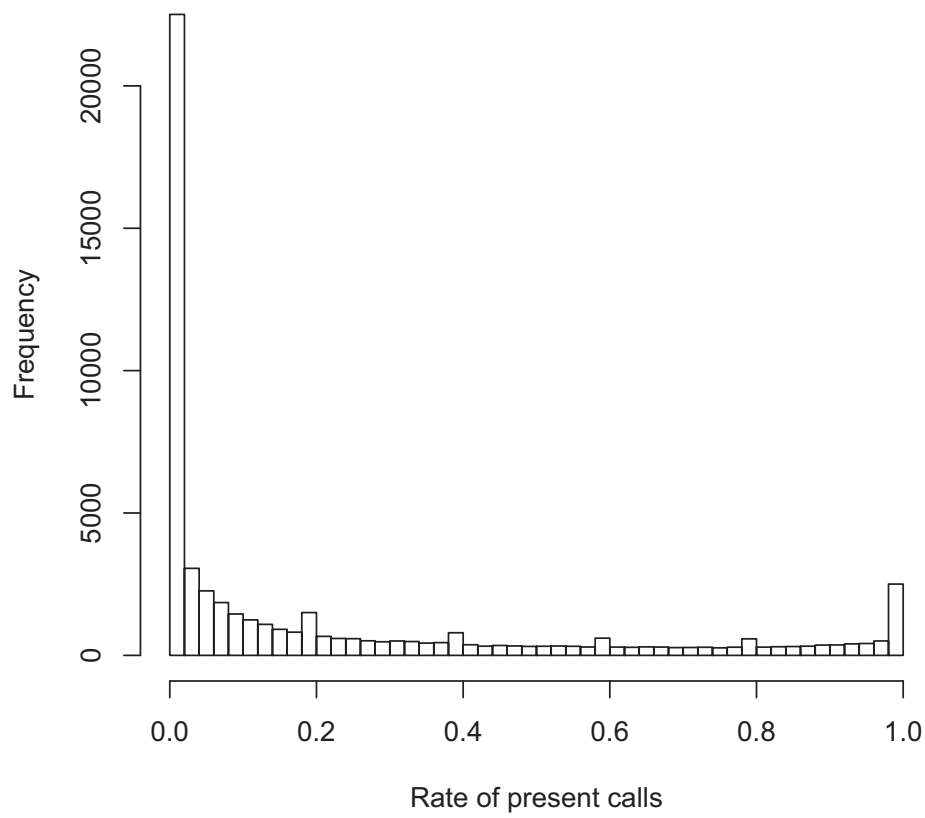

Figure 2: Histogram of the fraction of time a probe set was called present among the QC-selected arrays.

attached base packages:

```
[1] splines    tools      stats      graphics  grDevices  utils      datasets  methods
[9] base
```

other attached packages:

```
[1] hgu133plus2cdf_2.0.0 simpleaffy_2.14.05  gcrma_2.10.0      matchprobes_1.10.0
[5] genefilter_1.16.0   survival_2.34      affy_1.14.2       affyio_1.4.1
[9] Biobase_1.16.1
```

loaded via a namespace (and not attached):

```
[1] annotate_1.14.1      AnnotationDbi_1.0.6 DBI_0.2-4          RSQLite_0.7-1
```

# Extracting Probe-Level Response Genetics Data

## 1 Introduction

This report describes the third step in the analysis of 75 FFPE Affymetrix experiments performed by Response Genetics for the Lung SPORE/DOD projects.

In this particular report, we combine probe locations with probe intensities for the genes and arrays that passed our QC filtering in Step 2.

## 2 Getting Ready

We use these libraries:

```
> library(simpleaffy)
> library(affy)
> library(MASS)
```

We increase the (RAM) memory limit.

```
> memory.limit(4000)
```

NULL

We load the (combined) QC data from step 2.

```
> qcs <- read.csv(file.path(".", "Output", "qc.csv"), row.names = 1)
> head(qcs)
```

|           | Specimen.Number | Date.of.Surgery    | Now                | day360             | year     | scale    |
|-----------|-----------------|--------------------|--------------------|--------------------|----------|----------|
| AGR08-562 | MDA3            | 7/21/2005          | 8/1/2008           | 1090               | 2.986301 | 9.142070 |
| AGR08-563 | MDA4            | 7/1/2005           | 8/1/2008           | 1110               | 3.041096 | 7.711865 |
| AGR08-564 | MDA5            | 7/18/2005          | 8/1/2008           | 1093               | 2.994521 | 4.034480 |
| AGR08-565 | MDA6            | 5/20/2005          | 8/1/2008           | 1151               | 3.153425 | 7.191250 |
| AGR08-566 | MDA7            | 4/27/2005          | 8/1/2008           | 1174               | 3.216438 | 9.117584 |
| AGR08-567 | MDA9            | 4/28/2005          | 8/1/2008           | 1173               | 3.213699 | 6.276735 |
|           | percent.present | average.background | minimum.background | maximum.background |          |          |
| AGR08-562 | 14.924554       | 64.24909           | 61.21925           | 65.76459           |          |          |
| AGR08-563 | 9.733882        | 87.86460           | 83.11230           | 90.60596           |          |          |
| AGR08-564 | 16.932785       | 103.96073          | 98.11364           | 107.65860          |          |          |
| AGR08-565 | 8.074989        | 121.73156          | 115.24502          | 130.46763          |          |          |
| AGR08-566 | 7.860997        | 97.36753           | 91.17045           | 101.52322          |          |          |
| AGR08-567 | 20.040238       | 70.77899           | 67.44786           | 73.57750           |          |          |

|           | AFFX.r2.Ec.bioB.3_at | AFFX.r2.Ec.bioC.3_at | AFFX.r2.Ec.bioD.3_at |
|-----------|----------------------|----------------------|----------------------|
| AGR08-562 | 11.94451             | 13.46356             | 15.44630             |
| AGR08-563 | 10.81255             | 12.99849             | 15.02482             |
| AGR08-564 | 9.97492              | 11.95150             | 13.77272             |
| AGR08-565 | 10.87180             | 12.75666             | 14.89362             |
| AGR08-566 | 10.98516             | 13.18725             | 15.26179             |
| AGR08-567 | 11.09174             | 12.87277             | 14.75510             |

  

|           | AFFX.r2.P1.cre.3_at | AFFX.HSAC07.X00351_3_at | AFFX.HSAC07.X00351_5_at |
|-----------|---------------------|-------------------------|-------------------------|
| AGR08-562 | 16.95217            | 11.47109                | 6.865734                |
| AGR08-563 | 16.52847            | 10.96383                | 7.186255                |
| AGR08-564 | 15.53087            | 11.48040                | 6.101688                |
| AGR08-565 | 16.41770            | 10.52984                | 7.246127                |
| AGR08-566 | 16.71391            | 10.98318                | 7.605745                |
| AGR08-567 | 16.39212            | 11.80284                | 6.529268                |

  

|           | AFFX.HSAC07.X00351_M_at | AFFX.HUMGAPDH.M33197_3_at | AFFX.HUMGAPDH.M33197_5_at |
|-----------|-------------------------|---------------------------|---------------------------|
| AGR08-562 | 5.208003                | 9.327008                  | 6.043686                  |
| AGR08-563 | 7.415933                | 10.568375                 | 7.355697                  |
| AGR08-564 | 4.982652                | 11.587130                 | 6.766997                  |
| AGR08-565 | 5.986817                | 10.812368                 | 7.659383                  |
| AGR08-566 | 7.718577                | 10.869056                 | 6.381063                  |
| AGR08-567 | 3.897452                | 9.024217                  | 6.724048                  |

  

|           | AFFX.HUMGAPDH.M33197_M_at |
|-----------|---------------------------|
| AGR08-562 | 5.933223                  |
| AGR08-563 | 5.417545                  |
| AGR08-564 | 6.909541                  |
| AGR08-565 | 5.812756                  |
| AGR08-566 | 5.873258                  |
| AGR08-567 | 5.616518                  |

Use the QC rownames and percent present calls to construct a list of the names of files having more than 15% present calls.

```
> celpath <- file.path(".", "CELfile")
> fileNames <- paste(rownames(qcs), "CEL", sep = ".")[qcs$percent.present >
+ 15]
```

Also get a list of the probe set IDs that were selected in step 2 because they passed the QC filter (i.e., they were called present on all arrays that had at least 15% present calls).

```
> selected.id <- read.csv(file.path(".", "Output", "dat.selected.csv"),
+ row.names = 1)
> head(selected.id, 1)
```

|           | Accession     | Symbol        | AGR08.564.CEL | AGR08.567.CEL | AGR08.568.CEL | AGR08.571.CEL |
|-----------|---------------|---------------|---------------|---------------|---------------|---------------|
| 1007_s_at | NM_013994     | DDR1          | 1             | 1             | 1             | 1             |
|           | AGR08.574.CEL | AGR08.576.CEL | AGR08.577.CEL | AGR08.579.CEL | AGR08.580.CEL |               |
| 1007_s_at | 1             | 1             | 1             | 1             | 1             |               |
|           | AGR08.581.CEL | AGR08.582.CEL | AGR08.583.CEL | AGR08.584.CEL | AGR08.586.CEL |               |
| 1007_s_at | 1             | 1             | 1             | 1             | 1             |               |
|           | AGR08.588.CEL | AGR08.589.CEL | AGR08.591.CEL | AGR08.593.CEL | AGR08.595.CEL |               |

```

1007_s_at      1      1      1      1      1
      AGR08.597.CEL AGR08.598.CEL AGR08.600.CEL AGR08.601.CEL AGR08.602.CEL
1007_s_at      1      1      1      1      1
      AGR08.603.CEL AGR08.604.CEL AGR08.605.CEL AGR08.606.CEL AGR08.607.CEL
1007_s_at      1      1      1      1      1
      AGR08.608.CEL AGR08.609.CEL AGR08.613.CEL AGR08.614.CEL AGR08.615.CEL
1007_s_at      1      1      1      1      1
      AGR08.616.CEL AGR08.617.CEL AGR08.618.CEL AGR08.621.CEL AGR08.622.CEL
1007_s_at      1      1      1      1      1
      AGR08.625.CEL AGR08.627.CEL AGR08.629.CEL AGR08.630.CEL AGR08.631.CEL
1007_s_at      1      1      1      1      1
      AGR08.633.CEL AGR08.634.CEL AGR08.635.CEL AGR08.637.CEL AGR08.638.CEL
1007_s_at      1      1      1      1      1
      AGR08.640.CEL AGR08.643.CEL AGR08.644.CEL AGR08.666.CEL AGR08.669.CEL
1007_s_at      1      1      1      1      1
      AGR08.672.CEL
1007_s_at      1

```

### 3 Probe Level Data

For each array, we first use RMA to background correct the probe level data. We then extract the probes for the selected probe sets and save them in a separate file.

```

> for (i in 1:length(fileNames)) {
+   Data <- read.affybatch(file.path(celpath, fileNames[i]))
+   bgc <- bg.correct(Data, method = "rma")
+   probe.selected <- pm(bgc, rownames(selected.id))
+   write.csv(probe.selected, file.path(".", "Output", paste("selected_probe",
+     i, "csv", sep = ".")))
+ }

```

Now we merge these data back into a single structure.

```

> selected.dat <- read.csv(file.path(".", "Output", paste("selected_probe",
+   1, "csv", sep = ".")), row.names = 1)
> for (i in 2:length(fileNames)) {
+   tmp <- read.csv(file.path(".", "Output", paste("selected_probe",
+     i, "csv", sep = ".")), row.names = 1)
+   print(dim(tmp))
+   if (any(rownames(tmp) != rownames(selected.dat))) {
+     stop(paste("Probe file", i, "is missing some probes"))
+   }
+   selected.dat <- data.frame(selected.dat, tmp)
+ }

```

```

[1] 15775      1
[1] 15775      1
[1] 15775      1
[1] 15775      1

```





```
[1] 15775    1
[1] 15775    1

> dim(selected.dat)

[1] 15775    55
```

## 4 Relative probe locations

Read a file containing the probe locations.

```
> loc <- read.csv("Probe location.csv")
> head(loc)

      Probe Probe.locations      X  X.1  X.2  X.3  X.4  X.5  X.6  X.7  X.8  X.9 X.10 X.11
1 1007_s_at          3330 3443 3512 3563 3570 3576 3583 3589 3615 3713 3786 3793 3799
2  1053_at           1090 1102 1108 1126 1180 1186 1210 1216 1228 1288 1300 1312 1318
3   117_at           1463 1631 1643 1649 1655 1691 1697 1703 1727 1733 1739 1751 1811
4   121_at           2170 2218 2308 2374 2380 2392 2398 2464 2500 2572 2584 2590 2602
5 1255_g_at           1225 1236 1417 1436 1441 1446 1477 1487 1494 1518 1547 1559 1588
6  1294_at           2688 2694 2736 2814 2820 2922 2952 3018 3030 3090 3102 3114 3198
  X.12 X.13 X.14
1 3807 3871 3878
2 1360 1372 1396
3 1871 1877 1883
4 2608 2650 2668
5 1593 1599 1609
6 3204 3210 3264
```

Pick out the subset of these probe locations that matter for the selected probe sets.

```
> locf <- loc[loc$Probe %in% rownames(selected.id), ]
> dim(locf)

[1] 1400    17
```

Get the largest location within each probe set.

```
> locf.max <- apply(locf[, -1], 1, max, na.rm = TRUE)
```

Recompute the probe locations in terms of the position relative to the largest location in each set.

```
> probe.loc <- unlist(data.frame(t(locf[, -1] - locf.max)), use.names = FALSE)
> head(probe.loc, 50)

[1] -548 -435 -366 -315 -308 -302 -295 -289 -263 -165 -92 -85 -79 -71 -7  0
[17] -285 -219 -156 -153 -129 -72 -69 -60 -48 -45 -21 -15 -12 -9 -3  0
[33] -471 -451 -340 -17 -13 -10 -8 -7 -4 -1  0 NA NA NA NA NA
[49] -387 -346
```

Put the new probe location into a data frame.

```

> loc.dat <- data.frame(set = rep(locf$Probe, each = 16), probe = paste(rep(locf$Probe,
+   each = 16), rep(1:16, times = length(locf$Probe)), sep = ""), loc = probe.loc)
> dim(loc.dat)

[1] 22400    3

> head(loc.dat)

      set      probe  loc
1 1007_s_at 1007_s_at1 -548
2 1007_s_at 1007_s_at2 -435
3 1007_s_at 1007_s_at3 -366
4 1007_s_at 1007_s_at4 -315
5 1007_s_at 1007_s_at5 -308
6 1007_s_at 1007_s_at6 -302

```

Merge the relative probe locations with the probe intensity data.

```

> loc.dat <- merge(loc.dat, selected.dat, by.x = "probe", by.y = "row.names")
> dim(loc.dat)

[1] 15710    58

```

Finally, save the results.

```

> write.csv(loc.dat, file.path(".", "Output", "probe_selected_dat.csv"),
+   row.names = FALSE)

```

## 5 Appendix

This computation was performed in the following environment:

```
> sessionInfo()
```

```
R version 2.6.1 (2007-11-26)
```

```
i386-pc-mingw32
```

```
locale:
```

```
LC_COLLATE=English_United States.1252;LC_CTYPE=English_United States.1252;LC_MONETARY=English_United States.1252
```

```
attached base packages:
```

```
[1] splines  tools      stats      graphics  grDevices  utils      datasets  methods
[9] base
```

```
other attached packages:
```

```
[1] hgu133plus2cdf_2.0.0 MASS_7.2-38          simpleaffy_2.14.05  gcrma_2.10.0
[5] matchprobes_1.10.0  genefilter_1.16.0    survival_2.34       affy_1.14.2
[9] affyio_1.4.1        Biobase_1.16.1
```

```
loaded via a namespace (and not attached):
```

```
[1] annotate_1.14.1      AnnotationDbi_1.0.6 DBI_0.2-4           RSQLite_0.7-1
```

# Fitting intensity models to the Response Genetics Data

## 1 Introduction

This report describes the fourth step in the analysis of 75 FFPE Affymetrix experiments performed by Response Genetics for the Lung SPORE/DOD projects.

In this particular report, we fit a probe-level model to the (RMA) background-corrected intensities. This model explicitly incorporates the relative probe position (measured in bases from the most extreme probe in the probe set) that were recorded in Step 3. A robust regression model is used reduce the effect of FFPE sample degradation and minimize the effect of extreme values.

## 2 Getting Ready

We use these libraries:

```
> library(affy)
> library(MASS)
```

We increase the (RAM) memory limit.

```
> memory.limit(4000)
```

NULL

We read the probe level data (and locations) that was collected in Step 3.

```
> selected.dat <- read.csv(file.path(".", "Output", "probe_selected_dat.csv"))
> selected.dat[1:50, 1:4]
```

|    | probe       | set       | loc  | AGR08.564.CEL |
|----|-------------|-----------|------|---------------|
| 1  | 1007_s_at1  | 1007_s_at | -548 | 23.295146     |
| 2  | 1007_s_at10 | 1007_s_at | -165 | 655.862394    |
| 3  | 1007_s_at11 | 1007_s_at | -92  | 3338.862394   |
| 4  | 1007_s_at12 | 1007_s_at | -85  | 2129.862394   |
| 5  | 1007_s_at13 | 1007_s_at | -79  | 1638.862394   |
| 6  | 1007_s_at14 | 1007_s_at | -71  | 831.862394    |
| 7  | 1007_s_at15 | 1007_s_at | -7   | 6144.862394   |
| 8  | 1007_s_at16 | 1007_s_at | 0    | 12122.862394  |
| 9  | 1007_s_at2  | 1007_s_at | -435 | 87.902734     |
| 10 | 1007_s_at3  | 1007_s_at | -366 | 265.862394    |
| 11 | 1007_s_at4  | 1007_s_at | -315 | 218.862394    |
| 12 | 1007_s_at5  | 1007_s_at | -308 | 472.862394    |

|    |                |              |      |             |
|----|----------------|--------------|------|-------------|
| 13 | 1007_s_at6     | 1007_s_at    | -302 | 1234.862394 |
| 14 | 1007_s_at7     | 1007_s_at    | -295 | 70.175582   |
| 15 | 1007_s_at8     | 1007_s_at    | -289 | 174.862394  |
| 16 | 1007_s_at9     | 1007_s_at    | -263 | 242.862394  |
| 17 | 1316_at1       | 1316_at      | -285 | 66.326560   |
| 18 | 1316_at10      | 1316_at      | -45  | 3255.862394 |
| 19 | 1316_at11      | 1316_at      | -21  | 7.520074    |
| 20 | 1316_at12      | 1316_at      | -15  | 21.333594   |
| 21 | 1316_at13      | 1316_at      | -12  | 14.493832   |
| 22 | 1316_at14      | 1316_at      | -9   | 21.708411   |
| 23 | 1316_at15      | 1316_at      | -3   | 11.611369   |
| 24 | 1316_at16      | 1316_at      | 0    | 11.316169   |
| 25 | 1316_at2       | 1316_at      | -219 | 26.433032   |
| 26 | 1316_at3       | 1316_at      | -156 | 49.105807   |
| 27 | 1316_at4       | 1316_at      | -153 | 14.710180   |
| 28 | 1316_at5       | 1316_at      | -129 | 136.862408  |
| 29 | 1316_at6       | 1316_at      | -72  | 414.862394  |
| 30 | 1316_at7       | 1316_at      | -69  | 77.995711   |
| 31 | 1316_at8       | 1316_at      | -60  | 13.481984   |
| 32 | 1316_at9       | 1316_at      | -48  | 1850.862394 |
| 33 | 1552302_at1    | 1552302_at   | -471 | 15.389390   |
| 34 | 1552302_at10   | 1552302_at   | -1   | 77.995711   |
| 35 | 1552302_at11   | 1552302_at   | 0    | 91.886419   |
| 36 | 1552302_at2    | 1552302_at   | -451 | 21.708411   |
| 37 | 1552302_at3    | 1552302_at   | -340 | 635.862394  |
| 38 | 1552302_at4    | 1552302_at   | -17  | 13.481984   |
| 39 | 1552302_at5    | 1552302_at   | -13  | 19.916866   |
| 40 | 1552302_at6    | 1552302_at   | -10  | 22.483959   |
| 41 | 1552302_at7    | 1552302_at   | -8   | 55.188464   |
| 42 | 1552302_at8    | 1552302_at   | -7   | 48.268878   |
| 43 | 1552302_at9    | 1552302_at   | -4   | 54.297324   |
| 44 | 1552426_a_at1  | 1552426_a_at | -387 | 214.862394  |
| 45 | 1552426_a_at10 | 1552426_a_at | -18  | 651.862394  |
| 46 | 1552426_a_at11 | 1552426_a_at | 0    | 2121.862394 |
| 47 | 1552426_a_at2  | 1552426_a_at | -346 | 16.895508   |
| 48 | 1552426_a_at3  | 1552426_a_at | -277 | 15.868637   |
| 49 | 1552426_a_at4  | 1552426_a_at | -161 | 46.621529   |
| 50 | 1552426_a_at5  | 1552426_a_at | -154 | 17.167305   |

We reorder these data by location within probe set.

```
> selected.dat <- selected.dat[order(selected.dat$set, selected.dat$loc),
+ ]
> dim(selected.dat)
```

```
[1] 15710 58
```

Computations will be performed for each probe set.

```
> set.name <- unique(selected.dat$set)
> NG <- length(set.name)
> NS <- dim(selected.dat)[2] - 3
```

We set aside room to hold the results.

```
> b0 <- b1 <- data.frame(matrix(0, NG, NS))
> rownames(b0) <- rownames(b1) <- set.name
> colnames(b0) <- colnames(b1) <- colnames(selected.dat)[-(1:3)]
```

Now we go ahead and fit the models. This step may take several hours!

```
> for (i in 1:NG) {
+   ind <- which(selected.dat$set == set.name[i])
+   for (j in 1:NS) {
+     fit <- rlm(log2(selected.dat[ind, j + 3]) ~ selected.dat$loc[ind])
+     b0[i, j] <- coef(fit)[1]
+     b1[i, j] <- coef(fit)[2]
+   }
+ }
```

And we perform quantile normalization.

```
> b0.n <- b0
> b0.n[] <- normalize.quantiles(as.matrix(b0))
```

Finally, we save the results.

```
> write.csv(b0.n, file.path(".", "Output", "selected_data_norm_b0.csv"))
```

### 3 Appendix

This computation was performed in the following environment:

```
> sessionInfo()
```

```
R version 2.6.1 (2007-11-26)
i386-pc-mingw32
```

```
locale:
```

```
LC_COLLATE=English_United States.1252;LC_CTYPE=English_United States.1252;LC_MONETARY=English_United States.1252
```

```
attached base packages:
```

```
[1] splines  tools      stats      graphics  grDevices  utils      datasets  methods
[9] base
```

```
other attached packages:
```

```
[1] hgu133plus2cdf_2.0.0 MASS_7.2-38          simpleaffy_2.14.05  gcrma_2.10.0
[5] matchprobes_1.10.0  genefilter_1.16.0    survival_2.34       affy_1.14.2
[9] affyio_1.4.1        Biobase_1.16.1
```

```
loaded via a namespace (and not attached):
```

```
[1] annotate_1.14.1      AnnotationDbi_1.0.6 DBI_0.2-4           RSQLite_0.7-1
```

# Predict Prognosis Using Robust Gene Signature

## 1 Introduction

This report describes the sixth step in the analysis of 75 FFPE Affymetrix experiments performed by Response Genetics for the Lung SPORE/DOD projects.

In this particular report, we apply the fitted model to the Consortium data set of 442 patients reported in their Nature Medicine article (Shedden et al., 2008).

## 2 Getting Ready

We use these libraries:

```
> library(survival)
> library(superpc)
> library(affy)
> library(preprocessCore)
> pv.expr <- function(x, digits = 1) {
+   if (!x)
+     return(0)
+   exponent <- floor(log10(x))
+   base <- round(x/10^exponent, digits)
+   ifelse(x > 1e-06, paste("p = ", base * (10^exponent), sep = ""),
+     paste("p = ", base, "E", exponent, sep = ""))
+ }
> par(mar = c(4, 4, 3, 1), mfrow = c(1, 1))
```

## 3 FFPE data clinical variable only

In this section, we explore the association between clinical variables (histology and stage) and the survival or progression in FFPE data.

```
> clin <- read.csv("FFPE.clin.csv", row.names = 1)
> head(clin)
```

|               | Specimen.Number | SPOR.N | Histology      | Final.Pat.Stage | Time_to_Progression |
|---------------|-----------------|--------|----------------|-----------------|---------------------|
| AGR08.564.CEL | MDA5            | 1724   | Squamous       | IIA             | 2.3846680           |
| AGR08.567.CEL | MDA9            | 1663   | Adenocarcinoma | IB              | 2.2642026           |
| AGR08.568.CEL | MDA10           | 1623   | Squamous       | IIIB            | 0.3778234           |
| AGR08.571.CEL | MDA14           | 1576   | Adenocarcinoma | IIB             | 2.8199863           |

```

AGR08.574.CEL      MDA18   1547 Adenocarcinoma      IIB      2.8966461
AGR08.576.CEL      MDA20   1537 Adenocarcinoma      IB       2.1300479
      Progression Death_Time Death_Event stage
AGR08.564.CEL      0    2.384668           0      2
AGR08.567.CEL      0    2.264203           0      1
AGR08.568.CEL      1    1.404517           1      3
AGR08.571.CEL      0    2.819986           0      2
AGR08.574.CEL      1    2.896646           0      2
AGR08.576.CEL      0    2.130048           0      1

```

```
> dim(clin)
```

```
[1] 55  9
```

```
> ffpe.fitted <- read.csv(".\Output\\selected_data_norm_b0.csv", row.names = 1)
```

```
> dim(ffpe.fitted)
```

```
[1] 1400 55
```

```
> expr <- ffpe.fitted[, rownames(clin)]
```

```
> dim(expr)
```

```
[1] 1400 55
```

```
> all(rownames(clin) == colnames(expr))
```

```
[1] TRUE
```

In the survival analysis, we show that the Histology is not significantly associated with survival and progression. While the stage is associated with survival but not progression.

```
> fit <- survfit(Surv(Death_Time, Death_Event) ~ Histology, data = clin)
```

```
> logrank <- survdiff(Surv(Death_Time, Death_Event) ~ Histology, data = clin)
```

```
> logrank
```

Call:

```
survdiff(formula = Surv(Death_Time, Death_Event) ~ Histology,
  data = clin)
```

|                          | N  | Observed | Expected | (O-E) <sup>2</sup> /E | (O-E) <sup>2</sup> /V |
|--------------------------|----|----------|----------|-----------------------|-----------------------|
| Histology=Adenocarcinoma | 30 | 8        | 10.04    | 0.413                 | 0.936                 |
| Histology=Squamous       | 25 | 10       | 7.96     | 0.520                 | 0.936                 |

Chisq= 0.9 on 1 degrees of freedom, p= 0.333

Histology is not significantly associated with survival (Figure ??).



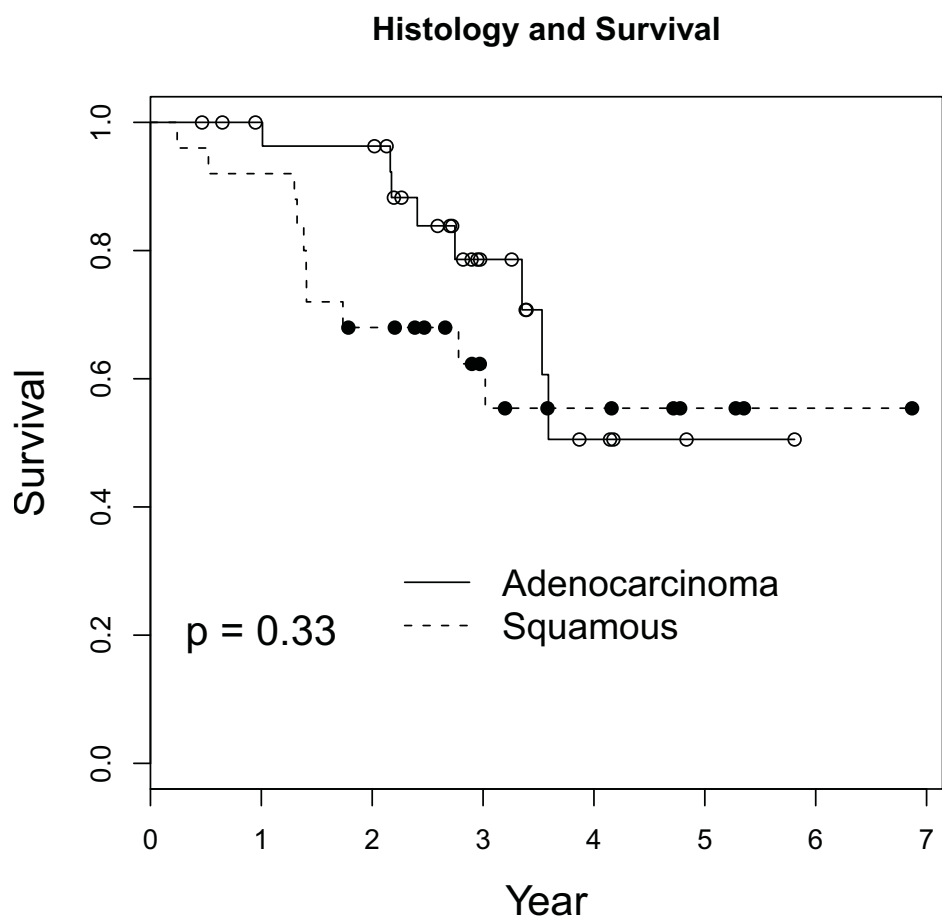

Figure 1: Kaplan Meier plots of survival for different histology

## 4 FFPE data hierarchical clustering

In this section, we used unsupervised classification to separate patients into 2 groups.

```
> hc <- hclust(dist(t(expr)))
> group <- cutree(hc, 2)
> table(clin$Histology, group)
```

```
      group
      1  2
Adenocarcinoma  5 25
Squamous       23  2
```

```
> clin$RGS <- group
> sdt <- apply(expr, 1, sd)
> hist(sdt)
> rgb.palette <- colorRampPalette(c("green", "black", "red"), space = "rgb")
```

Heatmap (Figure ??) only shows the genes with standard deviation greater than 1 to be clear, but note, the cluster dendrogram is generated using all genes.

```
> group1 <- c("High Risk", "Low Risk")[group]
> fit <- survfit(Surv(Death_Time, Death_Event) ~ group1, data = clin)
> fit
```

Call: survfit(formula = Surv(Death\_Time, Death\_Event) ~ group1, data = clin)

|                  | records | n.max | n.start | events | median | 0.95LCL | 0.95UCL |
|------------------|---------|-------|---------|--------|--------|---------|---------|
| group1=High Risk | 28      | 28    | 28      | 14     | 3.02   | 2.17    | NA      |
| group1=Low Risk  | 27      | 27    | 27      | 4      | NA     | 3.53    | NA      |

```
> logrank <- survdiff(Surv(Death_Time, Death_Event) ~ group1, data = clin)
> logrank
```

Call:

```
survdiff(formula = Surv(Death_Time, Death_Event) ~ group1, data = clin)
```

|                  | N  | Observed | Expected | (O-E) <sup>2</sup> /E | (O-E) <sup>2</sup> /V |
|------------------|----|----------|----------|-----------------------|-----------------------|
| group1=High Risk | 28 | 14       | 8.94     | 2.86                  | 5.72                  |
| group1=Low Risk  | 27 | 4        | 9.06     | 2.82                  | 5.72                  |

Chisq= 5.7 on 1 degrees of freedom, p= 0.0168

## 5 Predict Survival: FFPE data training to testing

In this section, we will use the FFPE training data to prediction the survival of the FFPE testing data. We will address the variability in the partition of training and testing data by permutation.

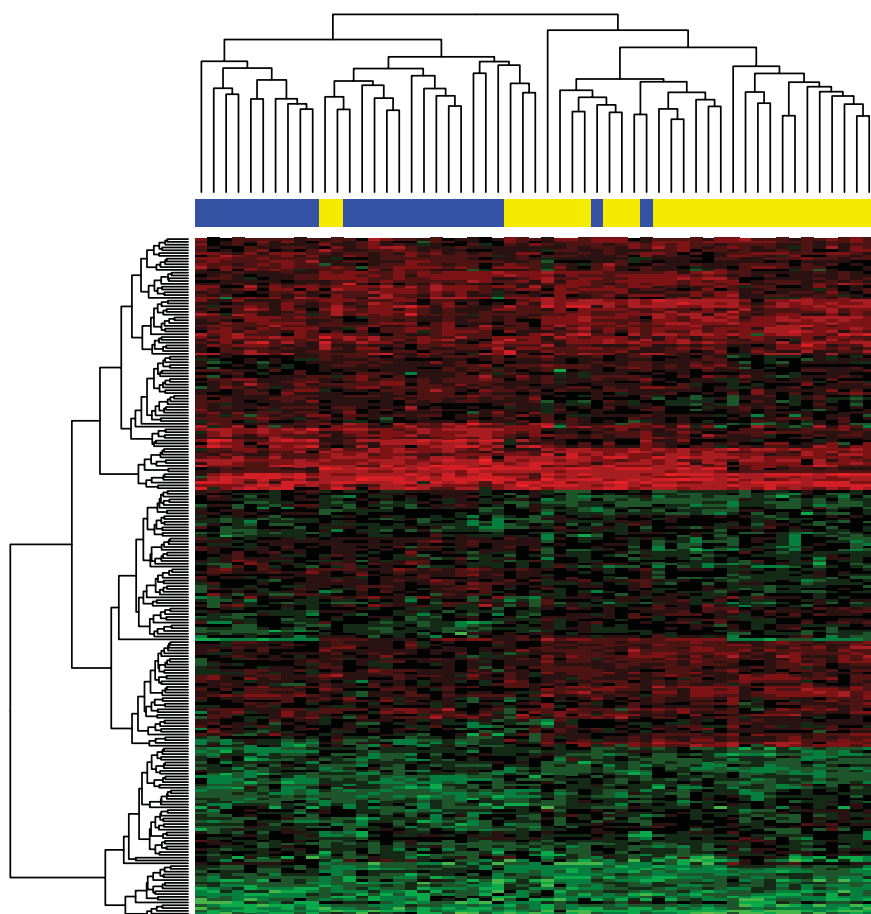

Figure 2: Heatmap of robust gene signature

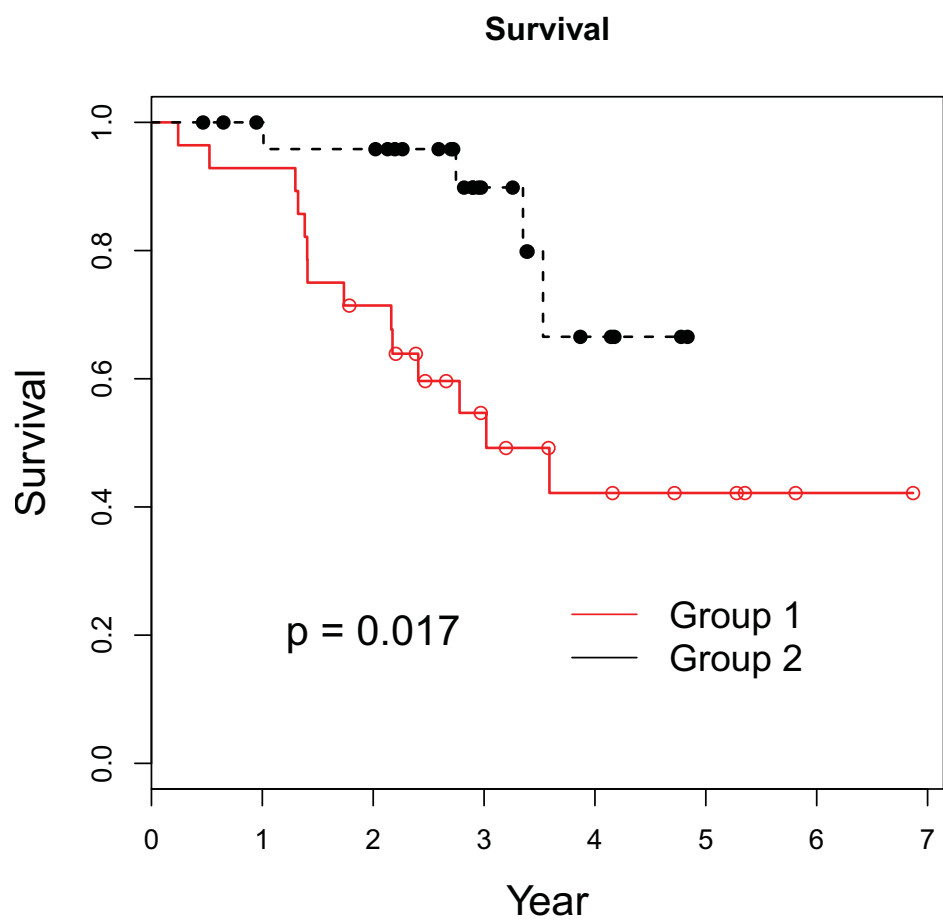

Figure 3: Kaplan Meier plots of survival for different clusters

```
Call: survfit(formula = Surv(Death_Time, Death_Event) ~ group1 + Histology,
              data = clin)
```

|                                            | records | n.max | n.start | events | median | 0.95LCL |
|--------------------------------------------|---------|-------|---------|--------|--------|---------|
| group1=High Risk, Histology=Adenocarcinoma | 5       | 5     | 5       | 4      | 2.41   | 2.17    |
| group1=High Risk, Histology=Squamous       | 23      | 23    | 23      | 10     | NA     | 1.74    |
| group1=Low Risk, Histology=Adenocarcinoma  | 25      | 25    | 25      | 4      | NA     | 3.53    |
| group1=Low Risk, Histology=Squamous        | 2       | 2     | 2       | 0      | NA     | NA      |

  

|                                            | 0.95UCL |
|--------------------------------------------|---------|
| group1=High Risk, Histology=Adenocarcinoma | NA      |
| group1=High Risk, Histology=Squamous       | NA      |
| group1=Low Risk, Histology=Adenocarcinoma  | NA      |
| group1=Low Risk, Histology=Squamous        | NA      |

Call:

```
survdiffformula = Surv(Death_Time, Death_Event) ~ group1 + Histology,
data = clin)
```

|                                            | N  | Observed | Expected | (O-E) <sup>2</sup> /E | (O-E) <sup>2</sup> /V |
|--------------------------------------------|----|----------|----------|-----------------------|-----------------------|
| group1=High Risk, Histology=Adenocarcinoma | 5  | 4        | 1.920    | 2.254                 | 2.536                 |
| group1=High Risk, Histology=Squamous       | 23 | 10       | 7.023    | 1.262                 | 2.076                 |
| group1=Low Risk, Histology=Adenocarcinoma  | 25 | 4        | 8.115    | 2.087                 | 3.828                 |
| group1=Low Risk, Histology=Squamous        | 2  | 0        | 0.942    | 0.942                 | 0.998                 |

Chisq= 6.6 on 3 degrees of freedom, p= 0.0863

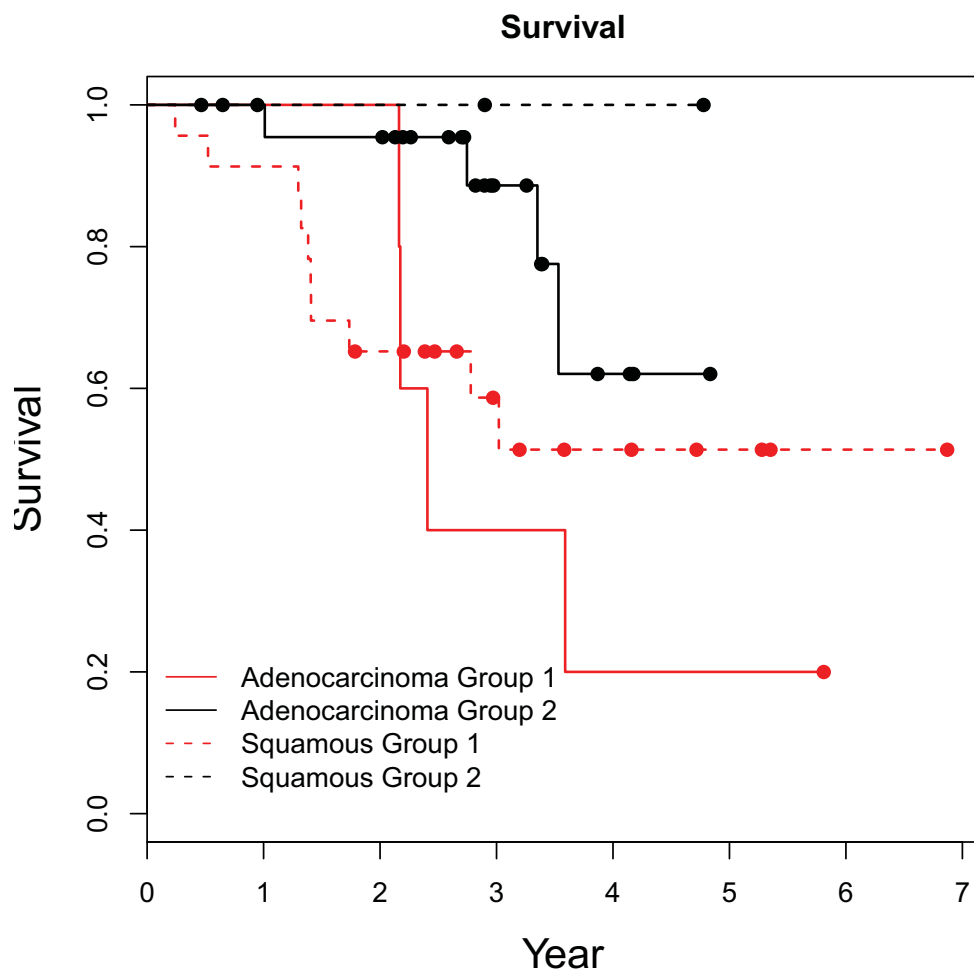

```

> ind1 <- 1:25
> ind2 <- 26:55
> data.train <- list(x = expr[, ind1], y = clin$Death_Time[ind1], censoring.status = clin$Death_Event[in
+   featurenames = rownames(expr))
> data.test <- list(x = expr[, ind2], y = clin$Death_Time[ind2], censoring.status = clin$Death_Event[in
+   featurenames = rownames(expr))
> train.obj <- superpc.train(data.train, type = "survival")
> fit <- superpc.predict(train.obj, data.train, data.test, threshold = 1,
+   prediction.type = "discrete")
> fit$v.pred.1df

```

```

AGR08.604.CEL AGR08.605.CEL AGR08.606.CEL AGR08.607.CEL AGR08.608.CEL AGR08.609.CEL
                2                2                2                1                2                1
AGR08.613.CEL AGR08.614.CEL AGR08.615.CEL AGR08.616.CEL AGR08.617.CEL AGR08.618.CEL
                2                1                2                1                1                1
AGR08.621.CEL AGR08.622.CEL AGR08.625.CEL AGR08.627.CEL AGR08.629.CEL AGR08.630.CEL
                1                1                1                1                2                2
AGR08.631.CEL AGR08.633.CEL AGR08.634.CEL AGR08.635.CEL AGR08.637.CEL AGR08.638.CEL
                2                1                2                1                2                2
AGR08.640.CEL AGR08.643.CEL AGR08.644.CEL AGR08.666.CEL AGR08.669.CEL AGR08.672.CEL
                2                2                2                2                2                2

```

```

> surv.fit <- survfit(Surv(Death_Time, Death_Event) ~ fit$v.pred.1df,
+   data = clin[ind2, ])
> surv.fit

```

```

Call: survfit(formula = Surv(Death_Time, Death_Event) ~ fit$v.pred.1df,
  data = clin[ind2, ])

```

|                   | records | n.max | n.start | events | median | 0.95LCL | 0.95UCL |
|-------------------|---------|-------|---------|--------|--------|---------|---------|
| fit\$v.pred.1df=1 | 12      | 12    | 12      | 0      | NA     | NA      | NA      |
| fit\$v.pred.1df=2 | 18      | 18    | 18      | 10     | 2.78   | 2.16    | NA      |

```

> logrank <- survdiff(Surv(Death_Time, Death_Event) ~ fit$v.pred.1df,
+   data = clin[ind2, ])
> logrank

```

```

Call:
survdiff(formula = Surv(Death_Time, Death_Event) ~ fit$v.pred.1df,
  data = clin[ind2, ])

```

|                   | N  | Observed | Expected | (O-E) <sup>2</sup> /E | (O-E) <sup>2</sup> /V |
|-------------------|----|----------|----------|-----------------------|-----------------------|
| fit\$v.pred.1df=1 | 12 | 0        | 3.83     | 3.83                  | 6.21                  |
| fit\$v.pred.1df=2 | 18 | 10       | 6.17     | 2.37                  | 6.21                  |

Chisq= 6.2 on 1 degrees of freedom, p= 0.0127

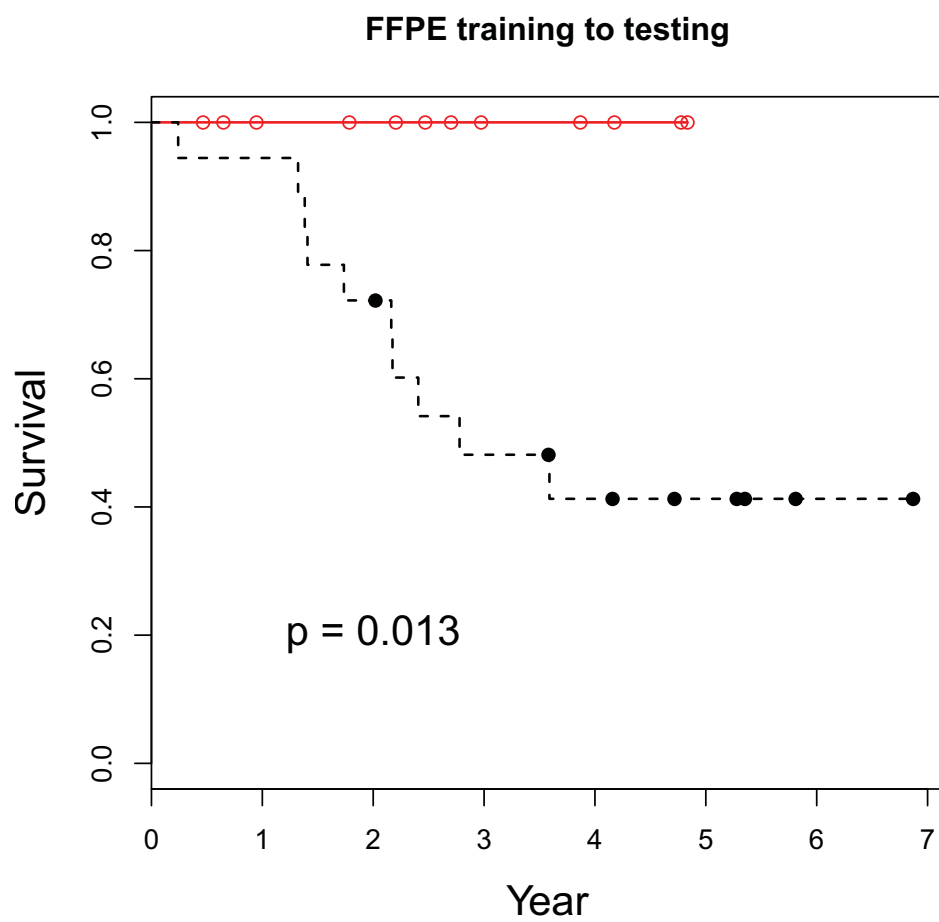

Figure 5: Kaplan Meier plots of survival, with groups predicted from FFPE training to testing

## 6 Predict Survival: FFPE data training to testing, bootstrap for robustness

```

> BT <- 500
> pv.logrank <- pv.coxph <- rep(NA, BT)
> set.seed(1234)
> for (t in 1:BT) {
+   ind1 <- sample(1:55, 25)
+   ind2 <- setdiff(1:55, ind1)
+   data.train <- list(x = expr[, ind1], y = clin$Death_Time[ind1],
+     censoring.status = clin$Death_Event[ind1], featurenames = NULL)
+   data.test <- list(x = expr[, ind2], y = clin$Death_Time[ind2],
+     censoring.status = clin$Death_Event[ind2], featurenames = NULL)
+   train.obj <- superpc.train(data.train, type = "survival")
+   fail <- try(fit <- superpc.predict(train.obj, data.train, data.test,
+     threshold = 1))
+   pv.coxph[t] <- summary(coxph(Surv(Death_Time, Death_Event) ~ fit$v.pred.1df,
+     data = clin[ind2, ]))$coef[5]
+   fail <- try(fit <- superpc.predict(train.obj, data.train, data.test,
+     threshold = 1, prediction.type = "discrete"))
+   logrank <- survdiff(Surv(Death_Time, Death_Event) ~ fit$v.pred.1df,
+     data = clin[ind2, ])
+   pv.logrank[t] <- pchisq(logrank$chisq, 1, lower.tail = F)
+ }
> hist(pv.logrank, nclass = 30)
> ks.test(pv.logrank, runif(500, 0, 1))

```

Two-sample Kolmogorov-Smirnov test

```

data: pv.logrank and runif(500, 0, 1)
D = 0.098, p-value = 0.01643
alternative hypothesis: two-sided

```

```
> summary(pv.logrank)
```

```

      Min.   1st Qu.   Median     Mean   3rd Qu.     Max.
0.001418 0.195900 0.406400 0.441500 0.674700 0.998200

```

## 7 Consortium Training to Consortium testing and FFPE

In this section, we using consortium training data to prediction the consortium testing data and the FFPE data. The consortium training and tesing data are define in the Nature Medicine paper.

We first read the consortium data, align the consortium and FFPE data and do normalization.

```

> beer.clin.dat <- read.csv("Consortium.clin.csv", row.names = 1)
> beer.expr <- read.csv("Consortium.expr.csv", row.names = 1)
> head(beer.clin.dat)

```



|                 | MICROARRAY      | dat.SITE | death | month | year      | GENDER | AGE_AT_DIAGNOSIS |
|-----------------|-----------------|----------|-------|-------|-----------|--------|------------------|
| CL2004110909AA  | CL2004110909AA  | DFCI     | 0     | 110   | 9.1666667 | Female | 55               |
| CL2004111002AA  | CL2004111002AA  | DFCI     | 0     | 98    | 8.1666667 | Female | 41               |
| CL2004111003AA  | CL2004111003AA  | DFCI     | 0     | 110   | 9.1666667 | Male   | 47               |
| CL20041110100AA | CL20041110100AA | DFCI     | 0     | 66    | 5.5000000 | Male   | 73               |
| CL20041110102AA | CL20041110102AA | DFCI     | 1     | 29    | 2.4166667 | Female | 63               |
| CL20041110103AA | CL20041110103AA | DFCI     | 1     | 7     | 0.5833333 | Male   | 72               |

|                 | smoking | stage | adj_chemo_YN |
|-----------------|---------|-------|--------------|
| CL2004110909AA  | 1       | 1     | 0            |
| CL2004111002AA  | 1       | 1     | 0            |
| CL2004111003AA  | 1       | 1     | 1            |
| CL20041110100AA | 0       | 1     | NA           |
| CL20041110102AA | 1       | 2     | NA           |
| CL20041110103AA | 0       | 1     | NA           |

```
> beer.clin <- beer.clin.dat[colnames(beer.expr), ]
> dim(beer.clin)
```

```
[1] 442 10
```

```
> dim(beer.expr)
```

```
[1] 1012 442
```

```
> which(rownames(beer.clin) != colnames(beer.expr))
```

```
integer(0)
```

```
> ffpe.expr <- expr[rownames(beer.expr), ]
> dim(ffpe.expr)
```

```
[1] 1012 55
```

```
> cb.expr <- data.frame(ffpe.expr, beer.expr)
> site <- c(rep("FFPE", dim(ffpe.expr)[2]), beer.clin$dat.SITE)
> cb.expr[] <- normalize.quantiles(as.matrix(cb.expr))
> ffpe.expr <- cb.expr[, site == "FFPE"]
> beer.expr <- cb.expr[, site != "FFPE"]
```

Using consortium training (HLM and MI) data to build model, first to predict the consortium testing (DFCI and MSKCC) data, and then predict the FFPE data using the same model.

```
> ind1 <- which(!is.na(beer.clin$year) & beer.clin$dat.SITE %in% c("HLM",
+ "MI"))
> length(ind1)
```

```
[1] 254
```

```
> data.train <- list(x = beer.expr[, ind1], y = beer.clin$year[ind1],
+ censoring.status = beer.clin$death[ind1], featurenames = NULL)
> train.obj <- superpc.train(data.train, type = "survival")
> ind2 <- which(beer.clin$year < 7 & beer.clin$dat.SITE %in% c("DFCI",
+ "MSKCC"))
> length(ind2)
```

```
[1] 157
```

```
> data.test <- list(x = beer.expr[, ind2], y = beer.clin$year[ind2],
+   censoring.status = beer.clin$death[ind2], featurenames = NULL)
> fit <- superpc.predict(train.obj, data.train, data.test, threshold = 1,
+   prediction.type = "discrete")
> fit$v.pred.1df
```

|               |               |                   |               |
|---------------|---------------|-------------------|---------------|
| NCI_U133A_1L  | NCI_U133A_2L  | NCI_U133A_3L      | NCI_U133A_4L  |
| 2             | 1             | 1                 | 1             |
| NCI_U133A_5L  | NCI_U133A_6L  | NCI_U133A_7L      | NCI_U133A_8L  |
| 1             | 1             | 1                 | 1             |
| NCI_U133A_9L  | NCI_U133A_11L | NCI_U133A_12L     | NCI_U133A_13L |
| 1             | 2             | 1                 | 2             |
| NCI_U133A_14L | NCI_U133A_15L | NCI_U133A_16L     | NCI_U133A_17L |
| 2             | 2             | 2                 | 1             |
| NCI_U133A_18L | NCI_U133A_19L | NCI_U133A_20L     | NCI_U133A_21L |
| 2             | 2             | 1                 | 1             |
| NCI_U133A_22L | NCI_U133A_24L | NCI_U133A_25L     | NCI_U133A_27L |
| 1             | 1             | 1                 | 1             |
| NCI_U133A_28L | NCI_U133A_29L | NCI_U133A_30L     | NCI_U133A_32L |
| 1             | 1             | 1                 | 1             |
| NCI_U133A_33L | NCI_U133A_34L | NCI_U133A_37L_Rep | NCI_U133A_39L |
| 2             | 2             | 2                 | 1             |
| NCI_U133A_40L | NCI_U133A_41L | NCI_U133A_42L     | NCI_U133A_43L |
| 1             | 1             | 1                 | 2             |
| NCI_U133A_44L | NCI_U133A_45L | NCI_U133A_46L     | NCI_U133A_47L |
| 1             | 1             | 1                 | 2             |
| NCI_U133A_49L | NCI_U133A_50L | NCI_U133A_51L     | NCI_U133A_54L |
| 1             | 1             | 1                 | 1             |
| NCI_U133A_55L | NCI_U133A_56L | NCI_U133A_57L     | NCI_U133A_58L |
| 1             | 1             | 2                 | 2             |
| NCI_U133A_59L | NCI_U133A_60L | NCI_U133A_61L     | NCI_U133A_62L |
| 2             | 1             | 1                 | 1             |
| NCI_U133A_63L | NCI_U133A_64L | NCI_U133A_65L     | NCI_U133A_66L |
| 1             | 1             | 1                 | 2             |
| NCI_U133A_67L | NCI_U133A_68L | NCI_U133A_69L     | NCI_U133A_70L |
| 2             | 1             | 1                 | 2             |
| NCI_U133A_71L | NCI_U133A_72L | NCI_U133A_73L     | NCI_U133A_74L |
| 1             | 2             | 2                 | 2             |
| NCI_U133A_75L | NCI_U133A_76L | NCI_U133A_77L     | NCI_U133A_78L |
| 1             | 1             | 1                 | 1             |
| NCI_U133A_79L | NCI_U133A_80L | NCI_U133A_81L     | NCI_U133A_82L |
| 1             | 2             | 1                 | 2             |
| NCI_U133A_83L | NCI_U133A_85L | NCI_U133A_86L     | NCI_U133A_87L |
| 1             | 1             | 1                 | 1             |
| NCI_U133A_88L | NCI_U133A_89L | NCI_U133A_90L     | NCI_U133A_91L |
| 1             | 1             | 2                 | 1             |
| NCI_U133A_92L | NCI_U133A_93L | NCI_U133A_94L_Rep | NCI_U133A_95L |

|                 |                 |                 |                 |
|-----------------|-----------------|-----------------|-----------------|
| 2               | 1               | 1               | 2               |
| NCI_U133A_96L   | NCI_U133A_99L   | NCI_U133A_100L  | NCI_U133A_101L  |
| 1               | 2               | 1               | 1               |
| NCI_U133A_102L  | NCI_U133A_103L  | NCI_U133A_106L  | NCI_U133A_107L  |
| 1               | 1               | 1               | 2               |
| NCI_U133A_97L   | CL2004111022AA  | CL2004111043AA  | CL2005060345AA  |
| 1               | 1               | 1               | 1               |
| CL2004111046AA  | CL20041116136AA | CL2004111017AA  | CL2004111040AA  |
| 1               | 1               | 2               | 1               |
| CL2005060338AA  | CL2004111048AA  | CL2005060327AA  | CL20041119167AA |
| 2               | 1               | 2               | 1               |
| CL2005060344AA  | CL2005060346AA  | CL2004111041AA  | CL20041116134AA |
| 2               | 2               | 1               | 2               |
| CL2005060341AA  | CL2004111010AA  | CL2005060332AA  | CL2005060334AA  |
| 2               | 1               | 2               | 1               |
| CL2005060343AA  | CL20041119175AA | CL2004111045AA  | CL2005060333AA  |
| 1               | 1               | 1               | 1               |
| CL2005060337AA  | CL2005060336AA  | CL2005060340AA  | CL20041116156AA |
| 1               | 2               | 1               | 1               |
| CL2005060342AA  | CL2004111038AA  | CL2005060349AA  | CL2005060350AA  |
| 1               | 1               | 1               | 1               |
| CL2005060351AA  | CL2005060352AA  | CL2005060353AA  | CL2005060354AA  |
| 1               | 2               | 1               | 1               |
| CL2005060355AA  | CL2005060356AA  | CL2005060357AA  | CL2005060358AA  |
| 1               | 1               | 1               | 1               |
| CL2005060360AA  | CL2004111097AA  | CL2004111098AA  | CL20041110100AA |
| 1               | 1               | 1               | 1               |
| CL20041110102AA | CL20041110103AA | CL20041110104AA | CL20041110107AA |
| 2               | 2               | 1               | 1               |
| CL20041110108AA | CL20041110109AA | CL20041110110AA | CL20041110111AA |
| 1               | 2               | 1               | 1               |
| CL20041116112AA | CL20041116113AA | CL20041116114AA | CL20041119180AA |
| 1               | 1               | 1               | 1               |
| CL20041119181AA | CL20041119182AA | CL20041119183AA | CL20041119184AA |
| 1               | 1               | 2               | 1               |
| CL20041119186AA | CL20041119187AA | CL20041119191AA | CL20041119192AA |
| 2               | 1               | 1               | 1               |
| CL20041119194AA |                 |                 |                 |
| 2               |                 |                 |                 |

```
> surv.fit <- survfit(Surv(beer.clin$year[ind2], beer.clin$death[ind2]) ~
+   fit$v.pred.1df)
> logrank <- survdiff(Surv(beer.clin$year[ind2], beer.clin$death[ind2]) ~
+   fit$v.pred.1df)
> logrank
```

Call:

```
survdiff(formula = Surv(beer.clin$year[ind2], beer.clin$death[ind2]) ~
  fit$v.pred.1df)
```

```

              N Observed Expected (O-E)^2/E (O-E)^2/V
fit$v.pred.1df=1 112      42    55.2     3.17     14.5
fit$v.pred.1df=2  45      29    15.8    11.11     14.5

```

```
Chisq= 14.5 on 1 degrees of freedom, p= 0.00014
```

```
> pv <- pchisq(logrank$chisq, 1, lower.tail = F)
```

```
> ind3 <- which(beer.clin$year < 7 & beer.clin$dat.SITE %in% c("DFCI"))
```

```
> length(ind3)
```

```
[1] 64
```

```

> data.test <- list(x = beer.expr[, ind3], y = beer.clin$year[ind3],
+   censoring.status = beer.clin$death[ind3], featurenames = NULL)
> fit <- superpc.predict(train.obj, data.train, data.test, threshold = 1,
+   prediction.type = "discrete")
> fit$v.pred.1df

```

```

CL2004111022AA CL2004111043AA CL2005060345AA CL2004111046AA CL20041116136AA
              1              1              1              1              1
CL2004111017AA CL2004111040AA CL2005060338AA CL2004111048AA CL2005060327AA
              2              1              2              1              2
CL20041119167AA CL2005060344AA CL2005060346AA CL2004111041AA CL20041116134AA
              1              2              2              1              2
CL2005060341AA CL2004111010AA CL2005060332AA CL2005060334AA CL2005060343AA
              2              1              2              1              1
CL20041119175AA CL2004111045AA CL2005060333AA CL2005060337AA CL2005060336AA
              1              1              1              1              2
CL2005060340AA CL20041116156AA CL2005060342AA CL2004111038AA CL2005060349AA
              1              1              1              1              1
CL2005060350AA CL2005060351AA CL2005060352AA CL2005060353AA CL2005060354AA
              1              1              2              1              1
CL2005060355AA CL2005060356AA CL2005060357AA CL2005060358AA CL2005060360AA
              1              1              1              1              1
CL2004111097AA CL2004111098AA CL20041110100AA CL20041110102AA CL20041110103AA
              1              1              1              2              2
CL20041110104AA CL20041110107AA CL20041110108AA CL20041110109AA CL20041110110AA
              1              1              1              2              1
CL20041110111AA CL20041116112AA CL20041116113AA CL20041116114AA CL20041119180AA
              1              1              1              1              1
CL20041119181AA CL20041119182AA CL20041119183AA CL20041119184AA CL20041119186AA
              1              1              2              1              2
CL20041119187AA CL20041119191AA CL20041119192AA CL20041119194AA
              1              1              1              2

```

```

> surv.fit <- survfit(Surv(beer.clin$year[ind3], beer.clin$death[ind3]) ~
+   fit$v.pred.1df)

```

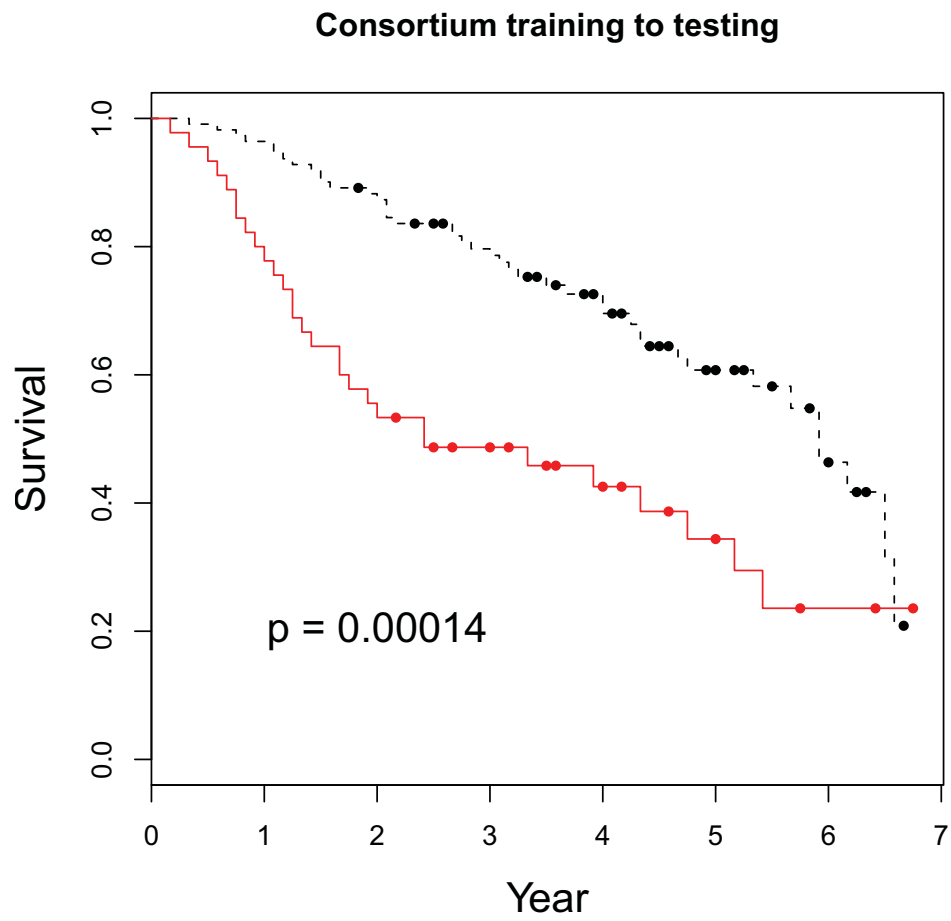

Figure 6: Kaplan Meier plots of survival, with groups predicted from consortium training to consortium testing

```
> logrank <- survdiff(Surv(beer.clin$year[ind3], beer.clin$death[ind3]) ~
+   fit$v.pred.1df)
> logrank
```

Call:

```
survdiff(formula = Surv(beer.clin$year[ind3], beer.clin$death[ind3]) ~
  fit$v.pred.1df)
```

|                   | N  | Observed | Expected | (O-E) <sup>2</sup> /E | (O-E) <sup>2</sup> /V |
|-------------------|----|----------|----------|-----------------------|-----------------------|
| fit\$v.pred.1df=1 | 48 | 23       | 28.24    | 0.973                 | 5.9                   |
| fit\$v.pred.1df=2 | 16 | 11       | 5.76     | 4.769                 | 5.9                   |

Chisq= 5.9 on 1 degrees of freedom, p= 0.0151

```
> pv <- pchisq(logrank$chisq, 1, lower.tail = F)
```

```
> ind4 <- which(beer.clin$year < 7 & beer.clin$dat.SITE %in% c("MSKCC"))
> length(ind4)
```

```
[1] 93
```

```
> data.test <- list(x = beer.expr[, ind4], y = beer.clin$year[ind4],
+   censoring.status = beer.clin$death[ind4], featurenames = NULL)
> fit <- superpc.predict(train.obj, data.train, data.test, threshold = 1,
+   prediction.type = "discrete")
> fit$v.pred.1df
```

|               |               |                   |               |
|---------------|---------------|-------------------|---------------|
| NCI_U133A_1L  | NCI_U133A_2L  | NCI_U133A_3L      | NCI_U133A_4L  |
| 2             | 1             | 1                 | 1             |
| NCI_U133A_5L  | NCI_U133A_6L  | NCI_U133A_7L      | NCI_U133A_8L  |
| 1             | 1             | 1                 | 1             |
| NCI_U133A_9L  | NCI_U133A_11L | NCI_U133A_12L     | NCI_U133A_13L |
| 1             | 2             | 1                 | 2             |
| NCI_U133A_14L | NCI_U133A_15L | NCI_U133A_16L     | NCI_U133A_17L |
| 2             | 2             | 2                 | 1             |
| NCI_U133A_18L | NCI_U133A_19L | NCI_U133A_20L     | NCI_U133A_21L |
| 2             | 2             | 1                 | 1             |
| NCI_U133A_22L | NCI_U133A_24L | NCI_U133A_25L     | NCI_U133A_27L |
| 1             | 1             | 1                 | 1             |
| NCI_U133A_28L | NCI_U133A_29L | NCI_U133A_30L     | NCI_U133A_32L |
| 1             | 1             | 1                 | 1             |
| NCI_U133A_33L | NCI_U133A_34L | NCI_U133A_37L_Rep | NCI_U133A_39L |
| 2             | 2             | 2                 | 1             |
| NCI_U133A_40L | NCI_U133A_41L | NCI_U133A_42L     | NCI_U133A_43L |
| 1             | 1             | 1                 | 2             |
| NCI_U133A_44L | NCI_U133A_45L | NCI_U133A_46L     | NCI_U133A_47L |
| 1             | 1             | 1                 | 2             |
| NCI_U133A_49L | NCI_U133A_50L | NCI_U133A_51L     | NCI_U133A_54L |
| 1             | 1             | 1                 | 1             |

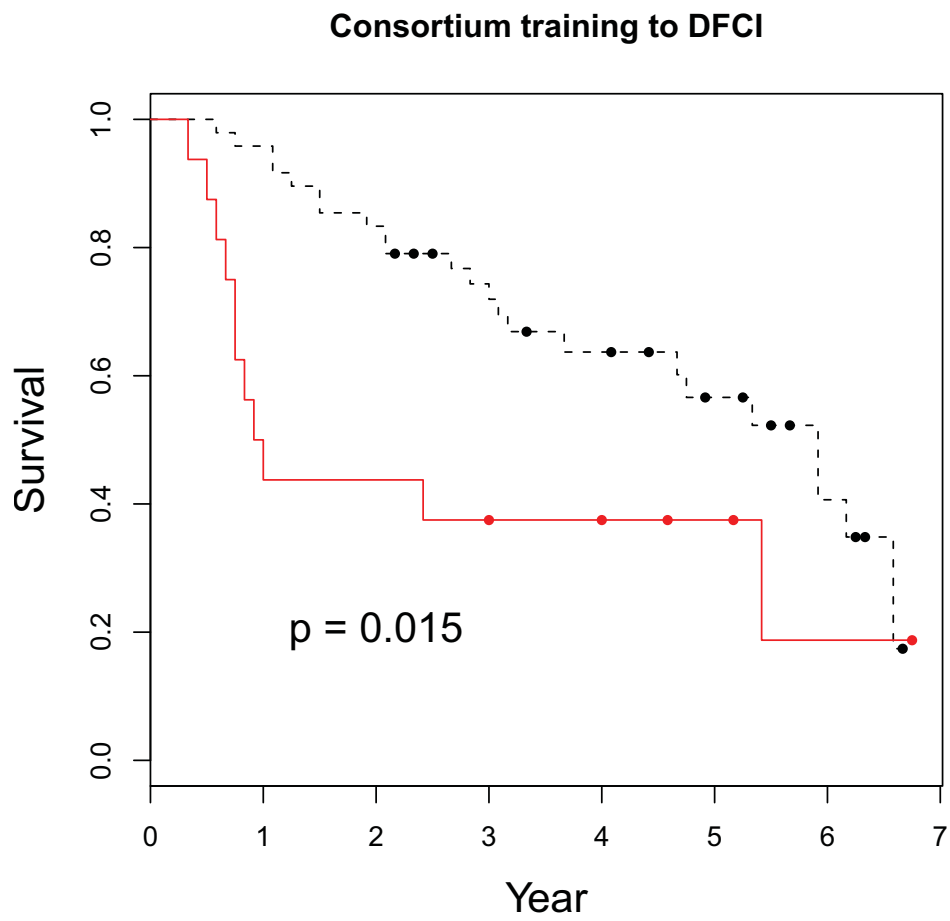

Figure 7: Kaplan Meier plots of survival, with groups predicted from consortium training to DFCI site

|                |                |                   |                |
|----------------|----------------|-------------------|----------------|
| NCI_U133A_55L  | NCI_U133A_56L  | NCI_U133A_57L     | NCI_U133A_58L  |
| 1              | 1              | 2                 | 2              |
| NCI_U133A_59L  | NCI_U133A_60L  | NCI_U133A_61L     | NCI_U133A_62L  |
| 2              | 1              | 1                 | 1              |
| NCI_U133A_63L  | NCI_U133A_64L  | NCI_U133A_65L     | NCI_U133A_66L  |
| 1              | 1              | 1                 | 2              |
| NCI_U133A_67L  | NCI_U133A_68L  | NCI_U133A_69L     | NCI_U133A_70L  |
| 2              | 1              | 1                 | 2              |
| NCI_U133A_71L  | NCI_U133A_72L  | NCI_U133A_73L     | NCI_U133A_74L  |
| 1              | 2              | 2                 | 2              |
| NCI_U133A_75L  | NCI_U133A_76L  | NCI_U133A_77L     | NCI_U133A_78L  |
| 1              | 1              | 1                 | 1              |
| NCI_U133A_79L  | NCI_U133A_80L  | NCI_U133A_81L     | NCI_U133A_82L  |
| 1              | 2              | 1                 | 2              |
| NCI_U133A_83L  | NCI_U133A_85L  | NCI_U133A_86L     | NCI_U133A_87L  |
| 1              | 1              | 1                 | 1              |
| NCI_U133A_88L  | NCI_U133A_89L  | NCI_U133A_90L     | NCI_U133A_91L  |
| 1              | 1              | 2                 | 1              |
| NCI_U133A_92L  | NCI_U133A_93L  | NCI_U133A_94L_Rep | NCI_U133A_95L  |
| 2              | 1              | 1                 | 2              |
| NCI_U133A_96L  | NCI_U133A_99L  | NCI_U133A_100L    | NCI_U133A_101L |
| 1              | 2              | 1                 | 1              |
| NCI_U133A_102L | NCI_U133A_103L | NCI_U133A_106L    | NCI_U133A_107L |
| 1              | 1              | 1                 | 2              |
| NCI_U133A_97L  |                |                   |                |
| 1              |                |                   |                |

```
> surv.fit <- survfit(Surv(beer.clin$year[ind4], beer.clin$death[ind4]) ~
+   fit$v.pred.1df)
> logrank <- survdiff(Surv(beer.clin$year[ind4], beer.clin$death[ind4]) ~
+   fit$v.pred.1df)
> logrank
```

Call:

```
survdiff(formula = Surv(beer.clin$year[ind4], beer.clin$death[ind4]) ~
  fit$v.pred.1df)
```

|                   | N  | Observed | Expected | (O-E) <sup>2</sup> /E | (O-E) <sup>2</sup> /V |
|-------------------|----|----------|----------|-----------------------|-----------------------|
| fit\$v.pred.1df=1 | 64 | 19       | 27.66    | 2.71                  | 11.0                  |
| fit\$v.pred.1df=2 | 29 | 18       | 9.34     | 8.03                  | 11.0                  |

Chisq= 11 on 1 degrees of freedom, p= 0.000899

```
> pv <- pchisq(logrank$chisq, 1, lower.tail = F)
```

```
> ind1 <- which(!is.na(beer.clin$year))
```

```
> length(ind1)
```

```
[1] 440
```



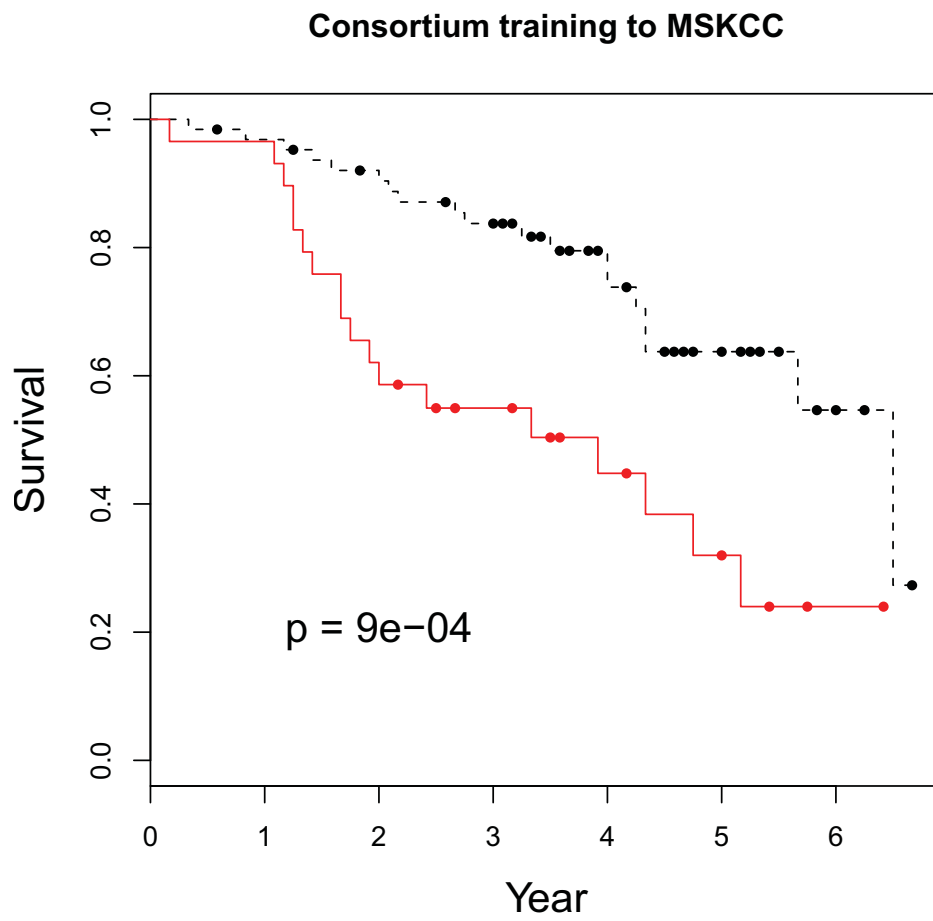

Figure 8: Kaplan Meier plots of survival, with groups predicted from consortium training to MSKCC site

```

> data.train <- list(x = beer.expr[, ind1], y = beer.clin$year[ind1],
+   censoring.status = beer.clin$death[ind1], featurenames = NULL)
> train.obj <- superpc.train(data.train, type = "survival")
> data.test <- list(x = ffpe.expr, y = clin$Death_Time, censoring.status = clin$Death_Event,
+   featurenames = rownames(ffpe.expr))
> fit <- superpc.predict(train.obj, data.train, data.test, threshold = 1,
+   prediction.type = "discrete")
> fit$v.pred.1df

AGR08.564.CEL AGR08.567.CEL AGR08.568.CEL AGR08.571.CEL AGR08.574.CEL AGR08.576.CEL
      2           1           2           2           1           1
AGR08.577.CEL AGR08.579.CEL AGR08.580.CEL AGR08.581.CEL AGR08.582.CEL AGR08.583.CEL
      1           2           2           2           2           1
AGR08.584.CEL AGR08.586.CEL AGR08.588.CEL AGR08.589.CEL AGR08.591.CEL AGR08.593.CEL
      1           2           1           2           1           2
AGR08.595.CEL AGR08.597.CEL AGR08.598.CEL AGR08.600.CEL AGR08.601.CEL AGR08.602.CEL
      2           2           1           2           1           2
AGR08.603.CEL AGR08.604.CEL AGR08.605.CEL AGR08.606.CEL AGR08.607.CEL AGR08.608.CEL
      2           2           2           2           2           2
AGR08.609.CEL AGR08.613.CEL AGR08.614.CEL AGR08.615.CEL AGR08.616.CEL AGR08.617.CEL
      2           2           1           2           1           2
AGR08.618.CEL AGR08.621.CEL AGR08.622.CEL AGR08.625.CEL AGR08.627.CEL AGR08.629.CEL
      1           2           2           1           1           2
AGR08.630.CEL AGR08.631.CEL AGR08.633.CEL AGR08.634.CEL AGR08.635.CEL AGR08.637.CEL
      2           2           1           2           2           2
AGR08.638.CEL AGR08.640.CEL AGR08.643.CEL AGR08.644.CEL AGR08.666.CEL AGR08.669.CEL
      2           2           2           2           2           2
AGR08.672.CEL
      2

> table(fit$v.pred.1df)

 1  2
16 39

> surv.fit <- survfit(Surv(clin$Death_Time, clin$Death_Event) ~ fit$v.pred.1df)
> logrank <- survdiff(Surv(clin$Death_Time, clin$Death_Event) ~ fit$v.pred.1df)
> logrank

Call:
survdiff(formula = Surv(clin$Death_Time, clin$Death_Event) ~
  fit$v.pred.1df)

              N Observed Expected (O-E)^2/E (O-E)^2/V
fit$v.pred.1df=1 16         2     5.57     2.29     3.32
fit$v.pred.1df=2 39        16    12.43     1.02     3.32

Chisq= 3.3 on 1 degrees of freedom, p= 0.0684

> pv <- pchisq(logrank$chisq, 1, lower.tail = F)

```

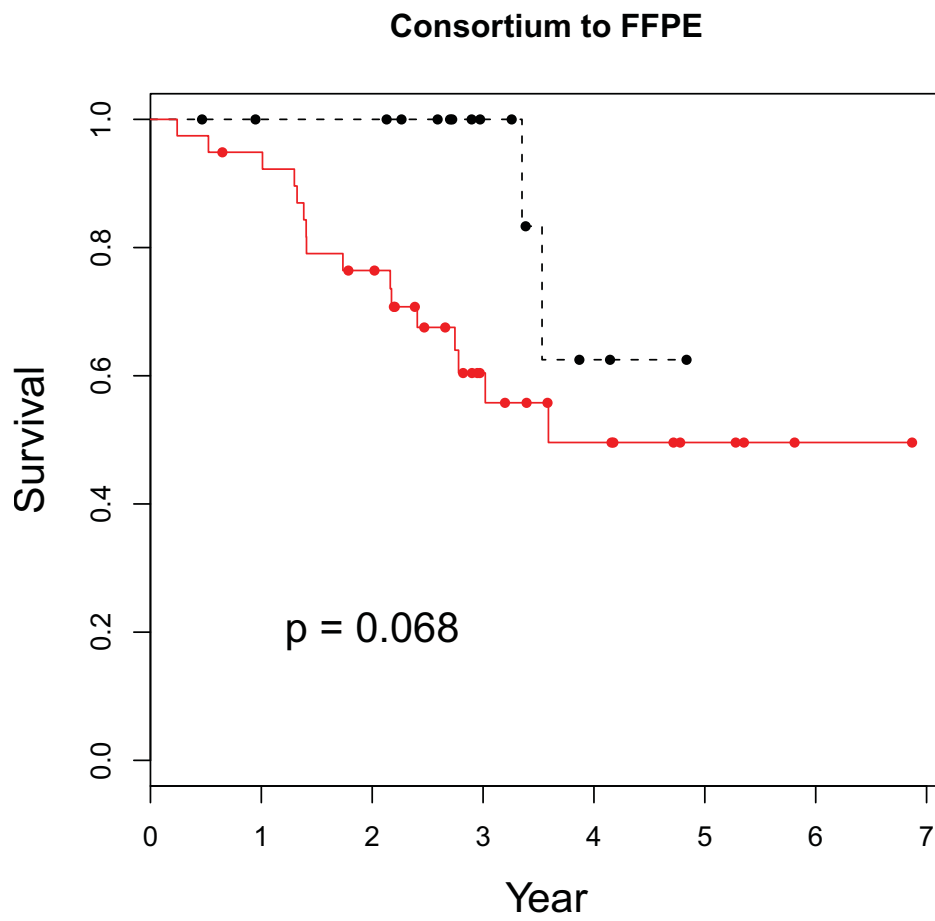

Figure 9: Kaplan Meier plots of survival, with groups predicted from consortium training to ffpe

## 8 FFPE predict Consortium

In this section, we built prediction model from FFPE data, and used the model to predict the Consortium dataset. Then we test the prediction performance for the whole consortium data, for each individual site, for different stages and with/without Chemo. We define a function to simply the code.

```
> data.train <- list(x = ffpe.expr, y = clin$Death_Time, censoring.status = clin$Death_Event,
+   featurenames = rownames(ffpe.expr))
> train.obj <- superpc.train(data.train, type = "survival")
> data.test <- list(x = beer.expr, y = beer.clin$year, censoring.status = beer.clin$death,
+   featurenames = NULL)
> fit <- superpc.predict(train.obj, data.train, data.test, threshold = 1,
+   prediction.type = "discrete")
> fit$v.pred.1df
```

|               |               |               |                   |
|---------------|---------------|---------------|-------------------|
| NCI_U133A_1L  | NCI_U133A_2L  | NCI_U133A_3L  | NCI_U133A_4L      |
| 2             | 1             | 1             | 1                 |
| NCI_U133A_5L  | NCI_U133A_6L  | NCI_U133A_7L  | NCI_U133A_8L      |
| 1             | 1             | 1             | 1                 |
| NCI_U133A_9L  | NCI_U133A_10L | NCI_U133A_11L | NCI_U133A_12L     |
| 1             | 1             | 2             | 2                 |
| NCI_U133A_13L | NCI_U133A_14L | NCI_U133A_15L | NCI_U133A_16L     |
| 2             | 2             | 2             | 2                 |
| NCI_U133A_17L | NCI_U133A_18L | NCI_U133A_19L | NCI_U133A_20L     |
| 1             | 2             | 2             | 1                 |
| NCI_U133A_21L | NCI_U133A_22L | NCI_U133A_23L | NCI_U133A_24L     |
| 1             | 1             | 2             | 1                 |
| NCI_U133A_25L | NCI_U133A_26L | NCI_U133A_27L | NCI_U133A_28L     |
| 1             | 2             | 1             | 2                 |
| NCI_U133A_29L | NCI_U133A_30L | NCI_U133A_31L | NCI_U133A_32L     |
| 2             | 1             | 2             | 1                 |
| NCI_U133A_33L | NCI_U133A_34L | NCI_U133A_35L | NCI_U133A_37L_Rep |
| 2             | 2             | 1             | 2                 |
| NCI_U133A_38L | NCI_U133A_39L | NCI_U133A_40L | NCI_U133A_41L     |
| 1             | 1             | 1             | 1                 |
| NCI_U133A_42L | NCI_U133A_43L | NCI_U133A_44L | NCI_U133A_45L     |
| 1             | 2             | 1             | 1                 |
| NCI_U133A_46L | NCI_U133A_47L | NCI_U133A_48L | NCI_U133A_49L     |
| 1             | 2             | 1             | 1                 |
| NCI_U133A_50L | NCI_U133A_51L | NCI_U133A_52L | NCI_U133A_53L     |
| 1             | 1             | 1             | 2                 |
| NCI_U133A_54L | NCI_U133A_55L | NCI_U133A_56L | NCI_U133A_57L     |
| 1             | 2             | 1             | 2                 |
| NCI_U133A_58L | NCI_U133A_59L | NCI_U133A_60L | NCI_U133A_61L     |
| 1             | 2             | 1             | 1                 |
| NCI_U133A_62L | NCI_U133A_63L | NCI_U133A_64L | NCI_U133A_65L     |
| 1             | 1             | 1             | 1                 |
| NCI_U133A_66L | NCI_U133A_67L | NCI_U133A_68L | NCI_U133A_69L     |
| 2             | 2             | 1             | 1                 |

|                   |                 |                 |                 |
|-------------------|-----------------|-----------------|-----------------|
| NCI_U133A_70L     | NCI_U133A_71L   | NCI_U133A_72L   | NCI_U133A_73L   |
| 1                 | 1               | 2               | 2               |
| NCI_U133A_74L     | NCI_U133A_75L   | NCI_U133A_76L   | NCI_U133A_77L   |
| 2                 | 1               | 1               | 1               |
| NCI_U133A_78L     | NCI_U133A_79L   | NCI_U133A_80L   | NCI_U133A_81L   |
| 1                 | 1               | 2               | 1               |
| NCI_U133A_82L     | NCI_U133A_83L   | NCI_U133A_84L   | NCI_U133A_85L   |
| 2                 | 1               | 1               | 1               |
| NCI_U133A_86L     | NCI_U133A_87L   | NCI_U133A_88L   | NCI_U133A_89L   |
| 1                 | 1               | 1               | 1               |
| NCI_U133A_90L     | NCI_U133A_91L   | NCI_U133A_92L   | NCI_U133A_93L   |
| 2                 | 1               | 2               | 1               |
| NCI_U133A_94L_Rep | NCI_U133A_95L   | NCI_U133A_96L   | NCI_U133A_98L   |
| 1                 | 1               | 1               | 1               |
| NCI_U133A_99L     | NCI_U133A_100L  | NCI_U133A_101L  | NCI_U133A_102L  |
| 1                 | 1               | 1               | 1               |
| NCI_U133A_103L    | NCI_U133A_106L  | NCI_U133A_107L  | NCI_U133A_97L   |
| 1                 | 1               | 1               | 1               |
| CL2004111013AA    | CL2004111022AA  | CL2004111042AA  | CL2004111002AA  |
| 1                 | 1               | 1               | 1               |
| CL2004111043AA    | CL2005060326AA  | CL2005060345AA  | CL2004111046AA  |
| 1                 | 1               | 1               | 1               |
| CL20041116136AA   | CL2004111003AA  | CL2004110909AA  | CL2004111017AA  |
| 1                 | 1               | 1               | 2               |
| CL2004111033AA    | CL2004111040AA  | CL2005060338AA  | CL2004111044AA  |
| 1                 | 1               | 2               | 2               |
| CL20041116127AA   | CL2004111048AA  | CL2005060327AA  | CL20041119167AA |
| 1                 | 2               | 2               | 1               |
| CL2005060344AA    | CL2005060346AA  | CL2004111041AA  | CL20041116126AA |
| 2                 | 2               | 1               | 2               |
| CL20041116134AA   | CL2005060341AA  | CL2004111010AA  | CL2004111018AA  |
| 2                 | 2               | 1               | 1               |
| CL2005060339AA    | CL2005060332AA  | CL2005060334AA  | CL2005060343AA  |
| 2                 | 2               | 1               | 1               |
| CL20041119175AA   | CL2004111045AA  | CL2005060328AA  | CL2005060329AA  |
| 1                 | 1               | 1               | 1               |
| CL2005060333AA    | CL2005060337AA  | CL2005060336AA  | CL2005060340AA  |
| 2                 | 1               | 2               | 1               |
| CL20041116156AA   | CL2005060342AA  | CL2004111038AA  | CL2005060348AA  |
| 1                 | 1               | 1               | 2               |
| CL2005060349AA    | CL2005060350AA  | CL2005060351AA  | CL2005060352AA  |
| 1                 | 1               | 1               | 2               |
| CL2005060353AA    | CL2005060354AA  | CL2005060355AA  | CL2005060356AA  |
| 1                 | 1               | 1               | 1               |
| CL2005060357AA    | CL2005060358AA  | CL2005060360AA  | CL2004111097AA  |
| 1                 | 1               | 1               | 1               |
| CL2004111098AA    | CL20041110100AA | CL20041110102AA | CL20041110103AA |
| 1                 | 1               | 1               | 2               |

|                   |                   |                   |                   |
|-------------------|-------------------|-------------------|-------------------|
| CL20041110104AA   | CL20041110107AA   | CL20041110108AA   | CL20041110109AA   |
| 1                 | 1                 | 1                 | 1                 |
| CL20041110110AA   | CL20041110111AA   | CL20041116112AA   | CL20041116113AA   |
| 1                 | 1                 | 1                 | 1                 |
| CL20041116114AA   | CL20041119179AA   | CL20041119180AA   | CL20041119181AA   |
| 1                 | 1                 | 1                 | 1                 |
| CL20041119182AA   | CL20041119183AA   | CL20041119184AA   | CL20041119185AA   |
| 1                 | 2                 | 1                 | 1                 |
| CL20041119186AA   | CL20041119187AA   | CL20041119190AA   | CL20041119191AA   |
| 1                 | 1                 | 1                 | 1                 |
| CL20041119192AA   | CL20041119194AA   | CL2004113027AA    | NCI_Lung_1_U133A  |
| 1                 | 2                 | 2                 | 1                 |
| NCI_Lung_3_U133A  | NCI_Lung_4_U133A  | NCI_Lung_5_U133A  | NCI_Lung_6_U133A  |
| 1                 | 1                 | 1                 | 1                 |
| NCI_Lung_7_U133A  | NCI_Lung_8_U133A  | NCI_Lung_10_U133A | NCI_Lung_11_U133A |
| 1                 | 1                 | 1                 | 1                 |
| NCI_Lung_12_U133A | NCI_Lung_13_U133A | NCI_Lung_14_U133A | NCI_Lung_15_U133A |
| 1                 | 1                 | 1                 | 1                 |
| NCI_Lung_16_U133A | NCI_Lung_17_U133A | NCI_Lung_18_U133A | NCI_Lung_19_U133A |
| 2                 | 2                 | 2                 | 2                 |
| NCI_Lung_20_U133A | NCI_Lung_21_U133A | NCI_Lung_22_U133A | NCI_Lung_23_U133A |
| 1                 | 2                 | 1                 | 1                 |
| NCI_Lung_25_U133A | NCI_Lung_26_U133A | NCI_Lung_27_U133A | NCI_Lung_28_U133A |
| 2                 | 2                 | 2                 | 2                 |
| NCI_Lung_29_U133A | NCI_Lung_30_U133A | NCI_Lung31_U133A  | NCI_Lung32_U133A  |
| 1                 | 2                 | 1                 | 2                 |
| NCI_Lung33_U133A  | NCI_Lung34_U133A  | NCI_Lung35_U133A  | NCI_Lung36_U133A  |
| 2                 | 2                 | 2                 | 2                 |
| NCI_Lung37_U133A  | NCI_Lung38_U133A  | NCI_Lung39_U133A  | NCI_Lung40_U133A  |
| 2                 | 2                 | 1                 | 2                 |
| NCI_Lung41_U133A  | NCI_Lung42_U133A  | NCI_Lung43_U133A  | NCI_Lung44_U133A  |
| 2                 | 1                 | 1                 | 1                 |
| NCI_Lung45_U133A  | NCI_Lung46_U133A  | NCI_Lung47_U133A  | NCI_Lung48_U133A  |
| 1                 | 1                 | 2                 | 1                 |
| NCI_Lung49_U133A  | NCI_Lung50_U133A  | NCI_Lung51_U133A  | NCI_Lung52_U133A  |
| 1                 | 2                 | 2                 | 1                 |
| NCI_Lung53_U133A  | NCI_Lung54_U133A  | NCI_Lung55_U133A  | NCI_Lung56_U133A  |
| 1                 | 2                 | 2                 | 1                 |
| NCI_Lung57_U133A  | NCI_Lung58_U133A  | NCI_Lung_59_U133A | NCI_Lung_60_U133A |
| 1                 | 2                 | 2                 | 1                 |
| NCI_Lung_61_U133A | NCI_Lung_62_U133A | NCI_Lung_63_U133A | NCI_Lung_64_U133A |
| 2                 | 2                 | 1                 | 2                 |
| NCI_Lung_65_U133A | NCI_Lung_66_U133A | NCI_Lung_67_U133A | NCI_Lung_68_U133A |
| 2                 | 1                 | 1                 | 1                 |
| NCI_Lung_69_U133A | NCI_Lung_70_U133A | NCI_Lung_71_U133A | NCI_Lung_72_U133A |
| 2                 | 2                 | 1                 | 2                 |
| NCI_Lung_73_U133A | NCI_Lung_74_U133A | NCI_Lung_75_U133A | NCI_Lung_76_U133A |
| 2                 | 1                 | 1                 | 2                 |

|                    |                   |                   |                   |
|--------------------|-------------------|-------------------|-------------------|
| NCI_Lung_77_U133A  | NCI_Lung_78_U133A | NCI_Lung_79_U133A | NCI_Lung_80_U133A |
| 1                  | 2                 | 2                 | 1                 |
| NCI_Lung_81_U133A  | NCI_Lung_82_U133A | NCI_Lung_83_U133A | NCI_Lung_84_U133A |
| 1                  | 1                 | 1                 | 1                 |
| NCI_Lung_85_U133A  | NCI_Lung_86_U133A | NCI_Lung_89_U133A | NCI_Lung_90_U133A |
| 2                  | 1                 | 1                 | 1                 |
| NCI_Lung_91_U133A  | NCI_Lung_92_U133A | NCI_Lung_93_U133A | NCI_Lung_95_U133A |
| 1                  | 1                 | 2                 | 1                 |
| NCI_Lung_96_U133A  | NCI_Lung_97_U133A | NCI_Lung_98_U133A | NCI_Lung_99_U133A |
| 1                  | 1                 | 1                 | 1                 |
| NCI_Lung_100_U133A | NCI_lung201_U133A | NCI_lung202_U133A | NCI_lung203_U133A |
| 2                  | 1                 | 2                 | 2                 |
| NCI_lung204_U133A  | NCI_lung205_U133A | NCI_lung206_U133A | NCI_lung207_U133A |
| 1                  | 1                 | 2                 | 1                 |
| NCI_lung209_U133A  | NCI_lung210_U133A | NCI_lung212_U133A | NCI_lung213_U133A |
| 2                  | 1                 | 2                 | 1                 |
| NCI_lung214_U133A  | NCI_lung215_U133A | NCI_lung216_U133A | NCI_lung218_U133A |
| 1                  | 2                 | 2                 | 1                 |
| NCI_lung219_U133A  | NCI_lung220_U133A | NCI_lung221_U133A | NCI_lung222_U133A |
| 1                  | 1                 | 2                 | 1                 |
| NCI_lung224_U133A  | NCI_lung227_U133A | NCI_lung228_U133A | NCI_lung229_U133A |
| 2                  | 1                 | 1                 | 1                 |
| NCI_lung230_U133A  | NCI_lung231_U133A | NCI_lung234_U133A | NCI_lung235_U133A |
| 2                  | 1                 | 2                 | 2                 |
| NCI_lung236_U133A  | NCI_lung237_U133A | NCI_lung238_U133A | NCI_lung239_U133A |
| 1                  | 2                 | 1                 | 1                 |
| NCI_lung240_U133A  | NCI_lung246_U133A | NCI_lung247_U133A | NCI_lung249_U133A |
| 2                  | 2                 | 1                 | 2                 |
| NCI_lung258_U133A  | NCI_lung259_U133A | NCI_lung263_U133A | NCI_lung267_U133A |
| 2                  | 1                 | 1                 | 2                 |
| NCI_lung268_U133A  | NCI_lung269_U133A | NCI_lung270_U133A | NCI_lung271_U133A |
| 1                  | 2                 | 2                 | 2                 |
| NCI_lung272_U133A  | NCI_lung273_U133A | NCI_lung274_U133A | Moff_0130D        |
| 2                  | 2                 | 2                 | 2                 |
| Moff_0184A         | Moff_0404A        | Moff_0480I        | Moff_0516E        |
| 1                  | 2                 | 1                 | 1                 |
| Moff_0604H         | Moff_0683H        | Moff_0686G        | Moff_0711B        |
| 2                  | 2                 | 1                 | 2                 |
| Moff_0770K         | Moff_0928E        | Moff_0936G        | Moff_1221F        |
| 2                  | 1                 | 1                 | 1                 |
| Moff_1276H         | Moff_1300F        | Moff_1343G        | Moff_1400H        |
| 2                  | 1                 | 2                 | 1                 |
| Moff_1473F         | Moff_1477G        | Moff_1487F        | Moff_1514K        |
| 2                  | 1                 | 1                 | 1                 |
| Moff_1576F         | Moff_1734M        | Moff_1835I        | Moff_1864H        |
| 1                  | 2                 | 1                 | 2                 |
| Moff_1883G         | Moff_1888E        | Moff_1903E        | Moff_2072G        |
| 2                  | 2                 | 2                 | 1                 |

|                   |                   |                   |                   |
|-------------------|-------------------|-------------------|-------------------|
| Moff_2186B        | Moff_2199G        | Moff_2219F        | Moff_2296D        |
| 1                 | 2                 | 1                 | 2                 |
| Moff_2310K        | Moff_2325E        | Moff_2333J        | Moff_2352G        |
| 1                 | 1                 | 1                 | 1                 |
| Moff_2362A        | Moff_2366C        | Moff_2373H        | Moff_2401B        |
| 1                 | 2                 | 1                 | 2                 |
| Moff_2463A        | Moff_2470G        | Moff_2472B        | Moff_2497D        |
| 2                 | 1                 | 1                 | 1                 |
| Moff_2517G1       | Moff_2550F        | Moff_2595A        | Moff_2603I        |
| 1                 | 2                 | 1                 | 1                 |
| Moff_2629F        | Moff_2634G        | Moff_2658C        | Moff_2663F        |
| 1                 | 1                 | 1                 | 2                 |
| Moff_2690H        | Moff_2886F        | Moff_2955B        | Moff_2958D        |
| 1                 | 1                 | 1                 | 2                 |
| Moff_2996G        | Moff_3003G        | Moff_3009D        | Moff_3053B        |
| 1                 | 2                 | 1                 | 1                 |
| Moff_3191I        | Moff_3274K        | Moff_3298E        | Moff_3401F        |
| 2                 | 2                 | 2                 | 2                 |
| Moff_3730B        | Moff_4094F        | Moff_4112G        | Moff_4172B        |
| 1                 | 1                 | 2                 | 2                 |
| Moff_4217B        | Moff_3510G        | Moff_0142C        | Moff_0291A        |
| 1                 | 2                 | 2                 | 1                 |
| Moff_0298B        | Moff_0542F        | Moff_1817G1       | Moff_1940G        |
| 1                 | 2                 | 2                 | 1                 |
| Moff_0170D        | Moff_0978B        | NCI_lung275_U133A | NCI_lung276_U133A |
| 2                 | 1                 | 1                 | 2                 |
| NCI_lung277_U133A | NCI_lung278_U133A | NCI_lung280_U133A | NCI_lung281_U133  |
| 2                 | 2                 | 1                 | 2                 |
| NCI_lung282_U133  | NCI_lung283_U133  | NCI_lung285_U133  | NCI_lung286_U133  |
| 2                 | 2                 | 1                 | 1                 |
| NCI_lung289_U133  | NCI_lung290_U133  | NCI_lung291_U133  | NCI_lung292_U133  |
| 1                 | 2                 | 1                 | 2                 |
| NCI_lung293_U133  | NCI_lung294_U133  | NCI_lung295_U133  | NCI_Lung296_U133  |
| 2                 | 2                 | 1                 | 2                 |
| NCI_Lung297_U133  | NCI_Lung298_U133  | NCI_Lung299_U133  | NCI_Lung300_U133  |
| 2                 | 2                 | 1                 | 2                 |
| NCI_Lung304_U133  | NCI_Lung305_U133  | NCI_Lung306_U133  | NCI_Lung307_U133  |
| 1                 | 1                 | 2                 | 2                 |
| NCI_Lung309_U133  | NCI_Lung310_U133  | NCI_Lung311_U133  | NCI_Lung312_U133  |
| 2                 | 2                 | 2                 | 2                 |
| NCI_Lung313_U133  | NCI_Lung314_U133A | NCI_Lung318_U133A | NCI_Lung319_U133A |
| 2                 | 1                 | 2                 | 1                 |
| NCI_Lung320_U133A | NCI_Lung321_U133A |                   |                   |
| 1                 | 2                 |                   |                   |

```

> beer.clin$predicted <- fit$v.pred.1df
> write.csv(beer.clin, "beer.clin.pred.csv")
> display.surv <- function(subset, main, tx = 2) {

```



```

+   surv.fit <- survfit(Surv(beer.clin$year, beer.clin$death) ~ fit$v.pred.1df,
+     subset = subset)
+   logrank <- survdiff(Surv(beer.clin$year, beer.clin$death) ~ fit$v.pred.1df,
+     subset = subset)
+   pv <- pchisq(logrank$chisq, 1, lower.tail = F)
+   plot(surv.fit, col = 1:2, lty = c(2, 1), xlab = "Year", ylab = "Survival",
+     mark = 20, cex.lab = 1.5, main = main)
+   text(tx, 0.1, pv.expr(pv), cex = 1.5)
+   print(surv.fit)
+ }

```

Kaplan-Meier plots showing the predictive power of the robust gene signature developed from training set (55 FFPE tumor samples) and independently tested from different sets (To avoid the extrapolation of the prediction model, the comparison of survival time between predicted groups are truncated at 7 years):

Figure 8. FFPE to consortium over all.

Figure 9. FFPE to consortium MSKCC.

Figure 10. FFPE to consortium DFCI.

Figure 11. FFPE to consortium MI.

Figure 12. FFPE to consortium HLM.

Figure 13. FFPE to consortium stage I.

Figure 14. FFPE to consortium stage II.

Figure 15. FFPE to consortium stage III.

Figure 16. FFPE to consortium with chemotherapy.

Figure 17. FFPE to consortium without chemotherapy.

```
> display.surv(subset = which(beer.clin$year < 7), main = "FFPE to Consortium")
```

```
Call: survfit(formula = Surv(beer.clin$year, beer.clin$death) ~ fit$v.pred.1df,
  subset = subset)
```

|                   | records | n.max | n.start | events | median | 0.95LCL | 0.95UCL |
|-------------------|---------|-------|---------|--------|--------|---------|---------|
| fit\$v.pred.1df=1 | 223     | 223   | 223     | 113    | 5.33   | 4.33    | 5.92    |
| fit\$v.pred.1df=2 | 139     | 139   | 139     | 105    | 2.31   | 1.74    | 3.33    |

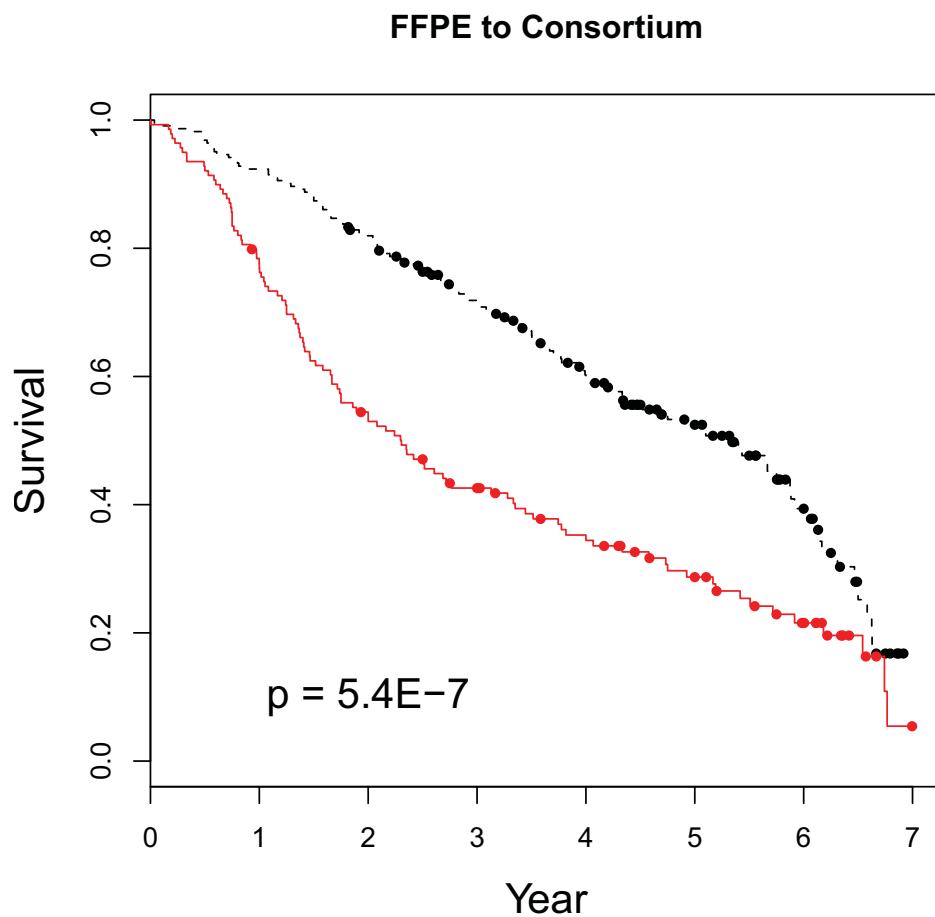

Figure 10: Kaplan Meier plots of survival, with groups predicted from FFPE to Consortium

```
> display.surv(subset = which(beer.clin$year < 7 & beer.clin$dat.SITE ==
+ "MSKCC"), main = "FFPE to MSKCC")
```

```
Call: survfit(formula = Surv(beer.clin$year, beer.clin$death) ~ fit$v.pred.1df,
subset = subset)
```

|                   | records | n.max | n.start | events | median | 0.95LCL | 0.95UCL |
|-------------------|---------|-------|---------|--------|--------|---------|---------|
| fit\$v.pred.1df=1 | 65      | 65    | 65      | 20     | 6.50   | 4.33    | NA      |
| fit\$v.pred.1df=2 | 28      | 28    | 28      | 17     | 3.33   | 1.75    | NA      |

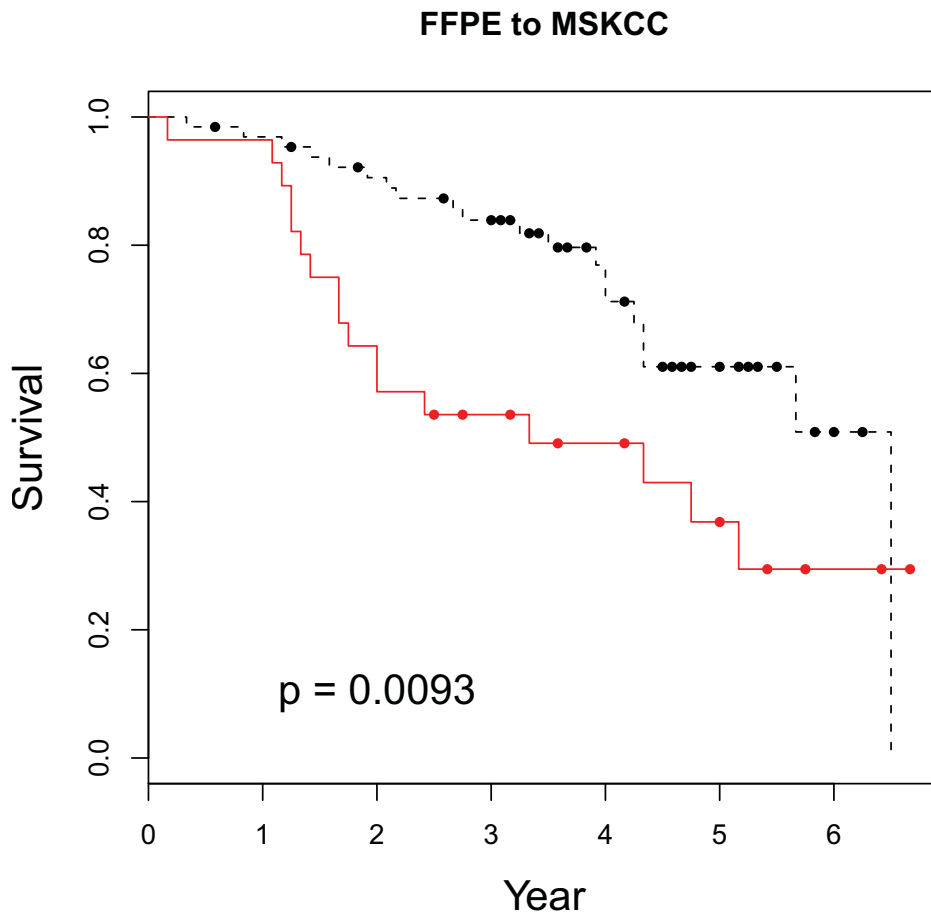

Figure 11: Kaplan Meier plots of survival, with groups predicted from FFPE to MSKCC

```
> display.surv(subset = which(beer.clin$year < 7 & beer.clin$dat.SITE ==
+   "DFCI"), main = "FFPE to DFCI")
```

```
Call: survfit(formula = Surv(beer.clin$year, beer.clin$death) ~ fit$v.pred.1df,
  subset = subset)
```

|                   | records | n.max | n.start | events | median | 0.95LCL | 0.95UCL |
|-------------------|---------|-------|---------|--------|--------|---------|---------|
| fit\$v.pred.1df=1 | 49      | 49    | 49      | 23     | 5.917  | 3.67    | NA      |
| fit\$v.pred.1df=2 | 15      | 15    | 15      | 11     | 0.917  | 0.75    | NA      |

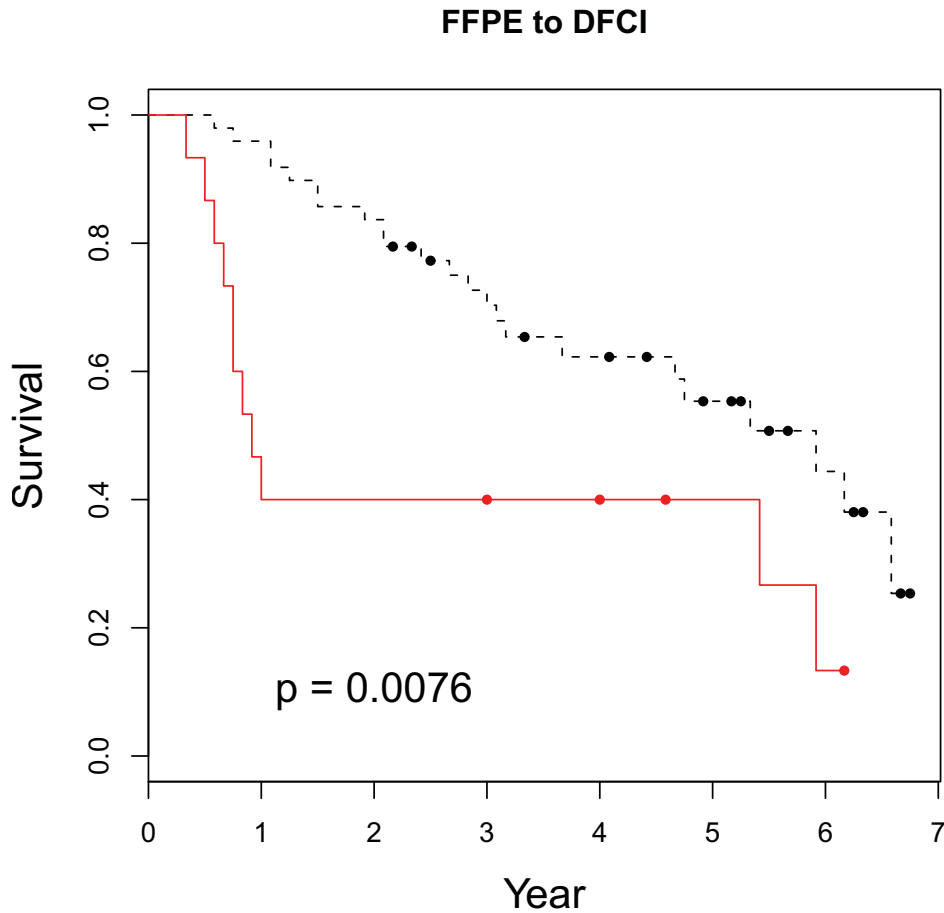

Figure 12: Kaplan Meier plots of survival, with groups predicted from FFPE to DFCI

```
> display.surv(subset = which(beer.clin$year < 7 & beer.clin$dat.SITE ==
+ "MI"), main = "FFPE to MI")
```

```
Call: survfit(formula = Surv(beer.clin$year, beer.clin$death) ~ fit$v.pred.1df,
subset = subset)
```

|                   | records | n.max | n.start | events | median | 0.95LCL | 0.95UCL |
|-------------------|---------|-------|---------|--------|--------|---------|---------|
| fit\$v.pred.1df=1 | 70      | 70    | 70      | 38     | 5.40   | 3.98    | 6.14    |
| fit\$v.pred.1df=2 | 66      | 66    | 66      | 52     | 2.24   | 1.58    | 3.82    |

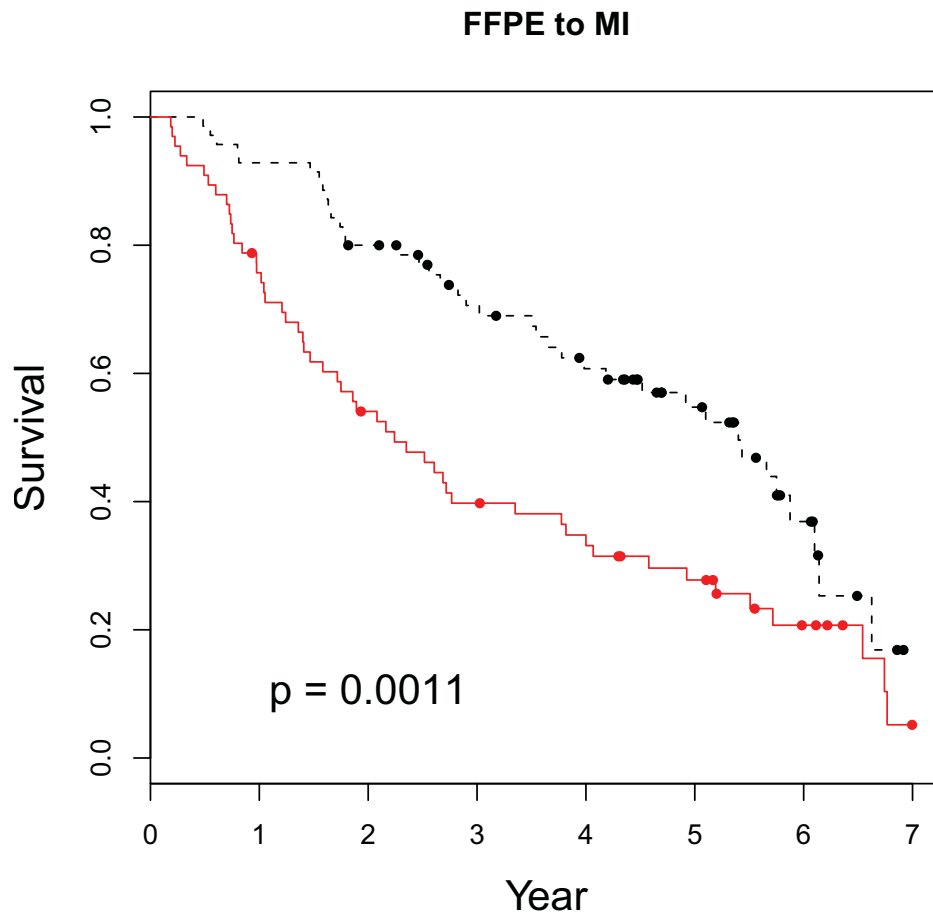

Figure 13: Kaplan Meier plots of survival, with groups predicted from FFPE to MI

```
> display.surv(subset = which(beer.clin$year < 7 & beer.clin$dat.SITE ==
+   "HLM"), main = "FFPE to HLM")
```

```
Call: survfit(formula = Surv(beer.clin$year, beer.clin$death) ~ fit$v.pred.1df,
  subset = subset)
```

|                   | records | n.max | n.start | events | median | 0.95LCL | 0.95UCL |
|-------------------|---------|-------|---------|--------|--------|---------|---------|
| fit\$v.pred.1df=1 | 39      | 39    | 39      | 32     | 3.35   | 2.20    | 5.10    |
| fit\$v.pred.1df=2 | 30      | 30    | 30      | 25     | 2.30   | 1.46    | 3.52    |

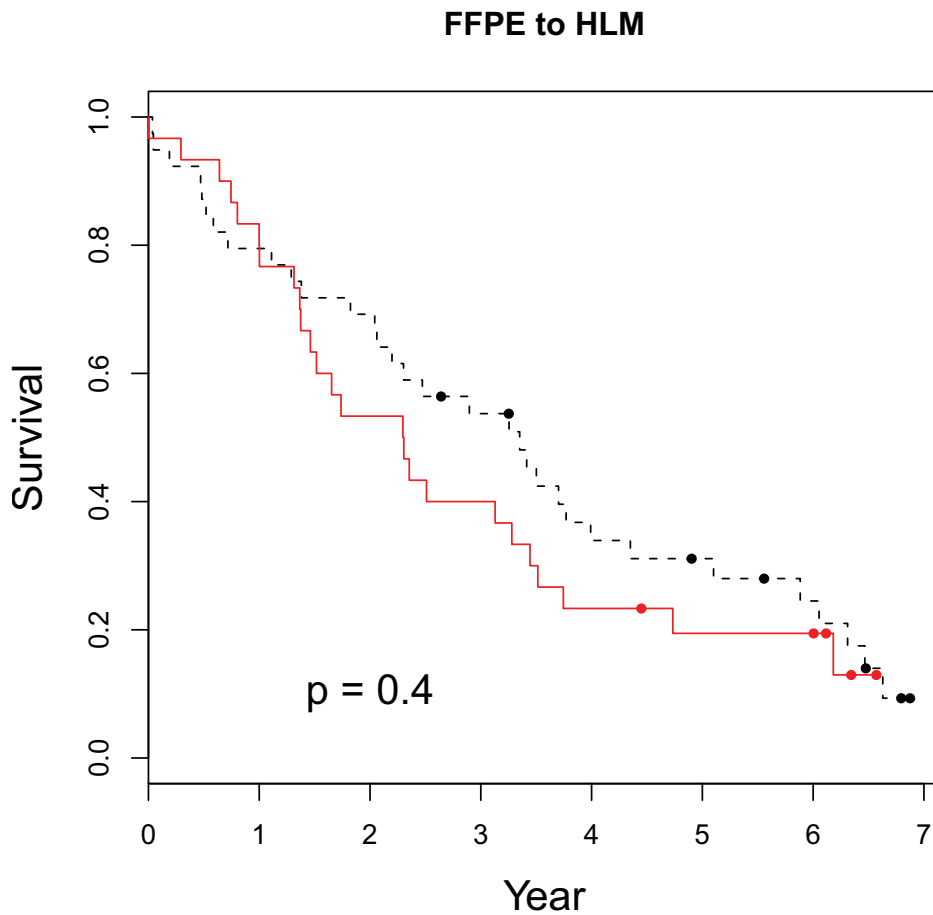

Figure 14: Kaplan Meier plots of survival, with groups predicted from FFPE to HLM

```
> display.surv(subset = which(beer.clin$year < 7 & beer.clin$stage ==
+ 1), main = "FFPE to Consortium, stage 1")
```

```
Call: survfit(formula = Surv(beer.clin$year, beer.clin$death) ~ fit$v.pred.1df,
subset = subset)
```

|                   | records | n.max | n.start | events | median | 0.95LCL | 0.95UCL |
|-------------------|---------|-------|---------|--------|--------|---------|---------|
| fit\$v.pred.1df=1 | 150     | 150   | 150     | 61     | 5.92   | 5.40    | 6.58    |
| fit\$v.pred.1df=2 | 65      | 65    | 65      | 38     | 4.75   | 3.33    | NA      |

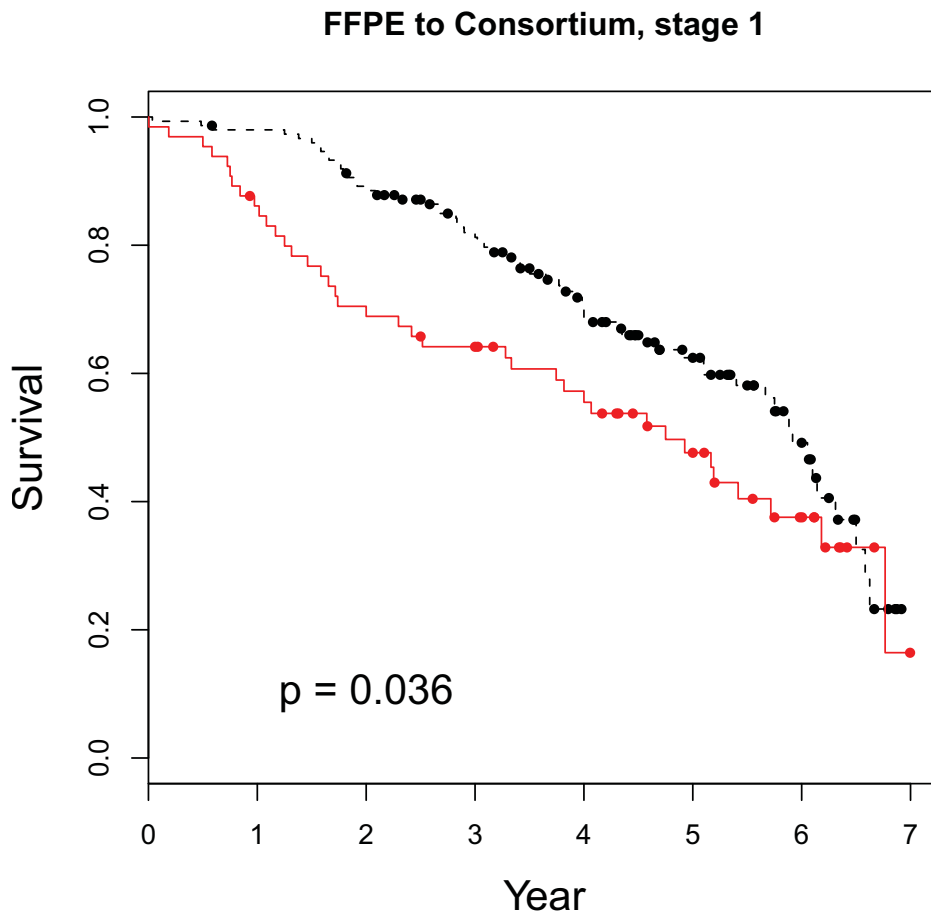

Figure 15: Kaplan Meier plots of survival, with groups predicted from FFPE to Consortium, stage 1

```
> display.surv(subset = which(beer.clin$year < 7 & beer.clin$stage ==
+ 2), main = "FFPE to Consortium, stage 2")
```

```
Call: survfit(formula = Surv(beer.clin$year, beer.clin$death) ~ fit$v.pred.1df,
subset = subset)
```

|                   | records | n.max | n.start | events | median | 0.95LCL | 0.95UCL |
|-------------------|---------|-------|---------|--------|--------|---------|---------|
| fit\$v.pred.1df=1 | 44      | 44    | 44      | 27     | 3.67   | 2.47    | 6.17    |
| fit\$v.pred.1df=2 | 38      | 38    | 38      | 33     | 1.75   | 1.04    | 3.44    |

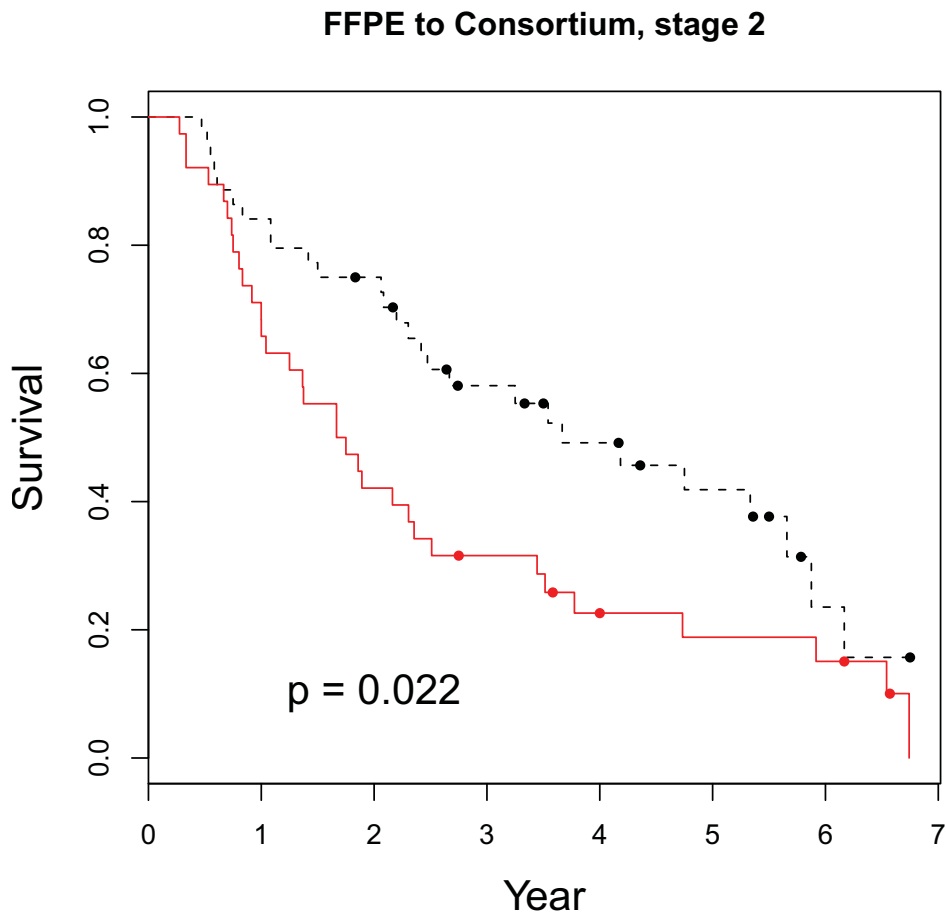

Figure 16: Kaplan Meier plots of survival, with groups predicted from FFPE to Consortium, stage 2



```
> display.surv(subset = which(beer.clin$year < 7 & beer.clin$stage ==
+ 3), main = "FFPE to Consortium, stage 3")
```

```
Call: survfit(formula = Surv(beer.clin$year, beer.clin$death) ~ fit$v.pred.1df,
subset = subset)
```

|                   | records | n.max | n.start | events | median | 0.95LCL | 0.95UCL |
|-------------------|---------|-------|---------|--------|--------|---------|---------|
| fit\$v.pred.1df=1 | 28      | 28    | 28      | 24     | 2.17   | 1.47    | 4.25    |
| fit\$v.pred.1df=2 | 36      | 36    | 36      | 34     | 1.41   | 1.21    | 2.24    |

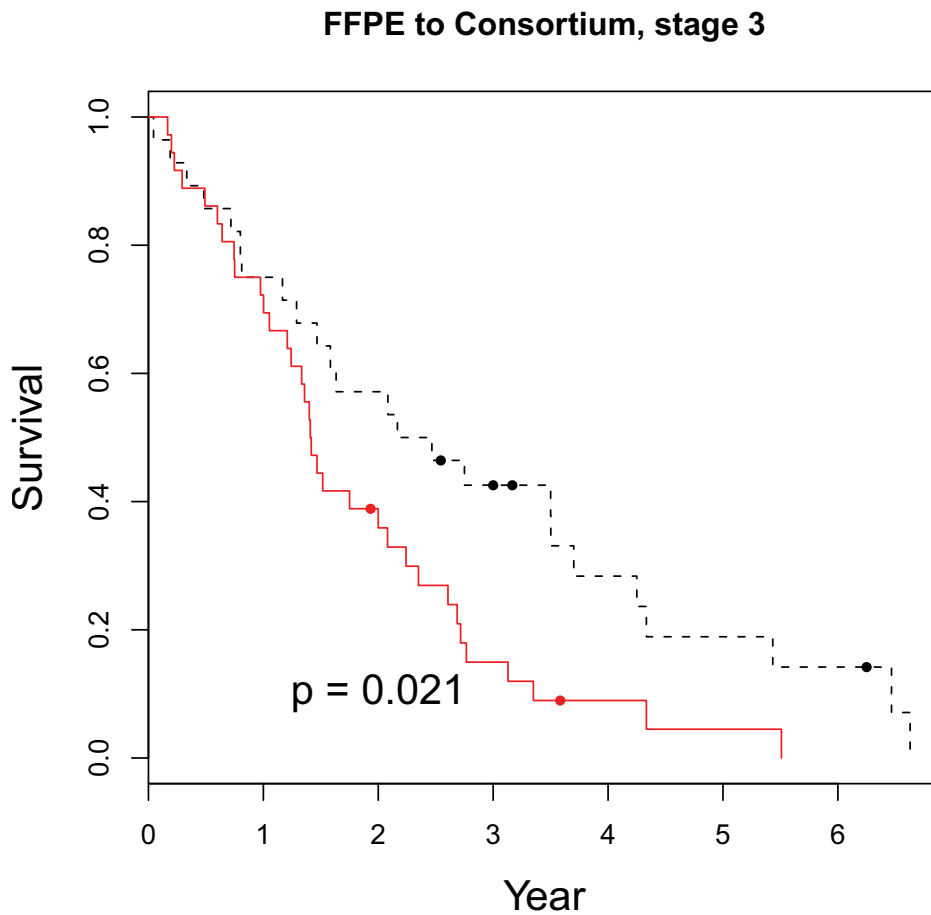

Figure 17: Kaplan Meier plots of survival, with groups predicted from FFPE to Consortium, stage 3

```
> display.surv(subset = which(beer.clin$year < 7 & beer.clin$adj_chemo_YN ==
+ 1), main = "FFPE to Consortium, with Chemo")
```

```
Call: survfit(formula = Surv(beer.clin$year, beer.clin$death) ~ fit$v.pred.1df,
subset = subset)
```

|                   | records | n.max | n.start | events | median | 0.95LCL | 0.95UCL |
|-------------------|---------|-------|---------|--------|--------|---------|---------|
| fit\$v.pred.1df=1 | 45      | 45    | 45      | 35     | 3.77   | 2.47    | 5.33    |
| fit\$v.pred.1df=2 | 26      | 26    | 26      | 23     | 1.69   | 1.37    | 4.75    |

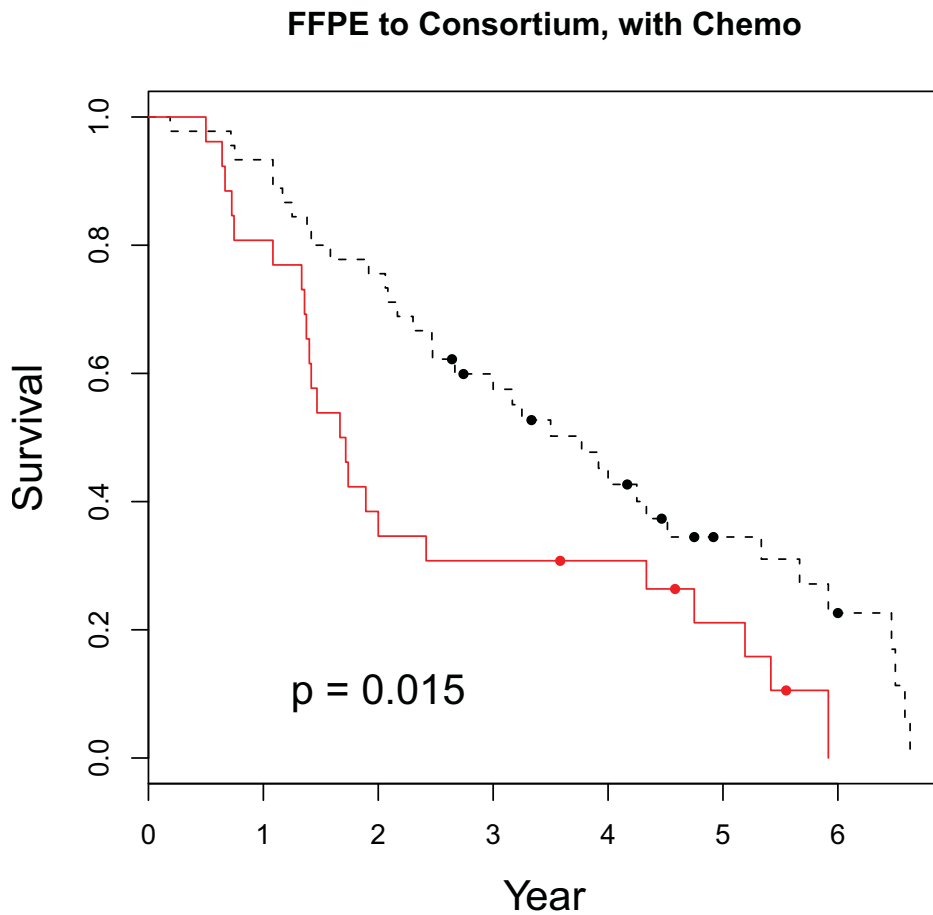

Figure 18: Kaplan Meier plots of survival, with groups predicted from FFPE to Consortium, with Chemo

```
> display.surv(subset = which(beer.clin$year < 7 & beer.clin$adj_chemo_YN ==
+ 0), main = "FFPE to Consortium, without Chemo")
```

```
Call: survfit(formula = Surv(beer.clin$year, beer.clin$death) ~ fit$v.pred.1df,
subset = subset)
```

|                   | records | n.max | n.start | events | median | 0.95LCL | 0.95UCL |
|-------------------|---------|-------|---------|--------|--------|---------|---------|
| fit\$v.pred.1df=1 | 120     | 120   | 120     | 49     | 5.88   | 5.10    | 6.62    |
| fit\$v.pred.1df=2 | 70      | 70    | 70      | 47     | 2.51   | 1.75    | 4.07    |

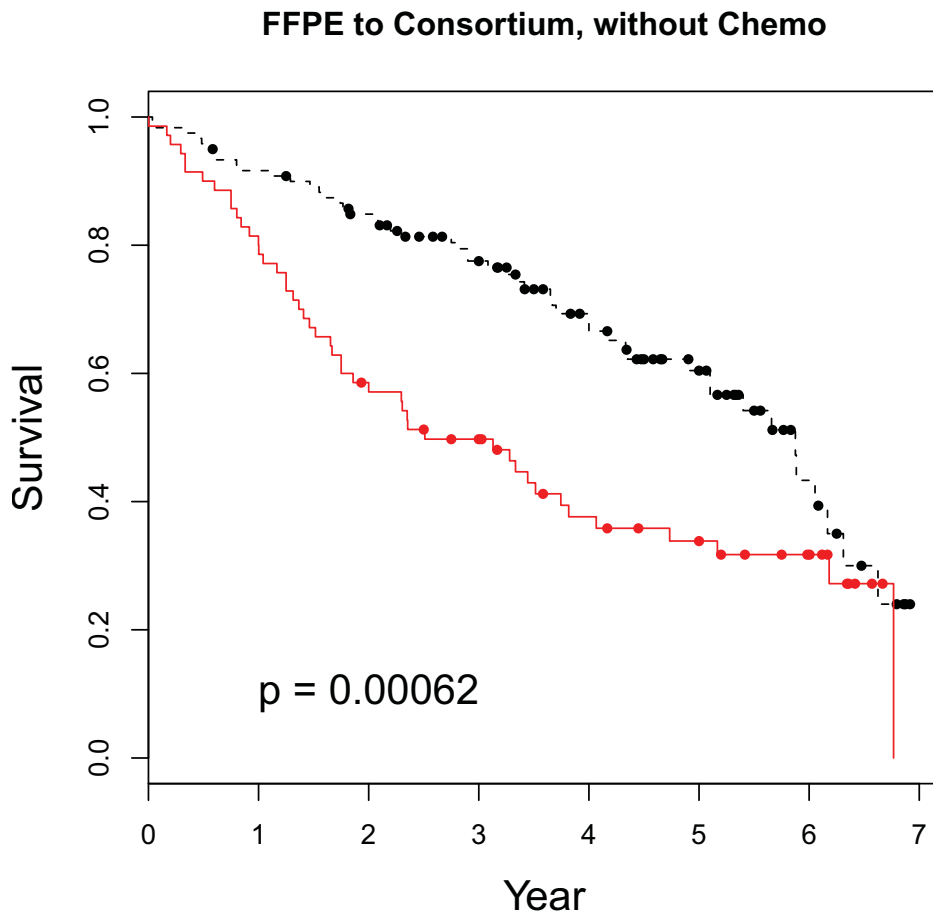

Figure 19: Kaplan Meier plots of survival, with groups predicted from FFPE to Consortium, without Chemo

## 9 FFPE data predict Consortium without truncation

Kaplan-Meier plots showing the predictive power of the robust gene signature developed from training set (55 FFPE tumor samples) and independently tested from different sets:

Figure 18. FFPE to consortium over all.

Figure 19. FFPE to consortium MSKCC.

Figure 20. FFPE to consortium DFCI.

Figure 21. FFPE to consortium MI.

Figure 22. FFPE to consortium HLM.

```
> display.surv(subset = which(!is.na(beer.clin$year)), main = "FFPE to Consortium w/o truncation",
+ tx = 4)
```

```
Call: survfit(formula = Surv(beer.clin$year, beer.clin$death) ~ fit$v.pred.1df,
subset = subset)
```

|                   | records | n.max | n.start | events | median | 0.95LCL | 0.95UCL |
|-------------------|---------|-------|---------|--------|--------|---------|---------|
| fit\$v.pred.1df=1 | 269     | 269   | 269     | 120    | 6.47   | 5.88    | 8.01    |
| fit\$v.pred.1df=2 | 171     | 171   | 171     | 116    | 3.52   | 2.51    | 5.19    |

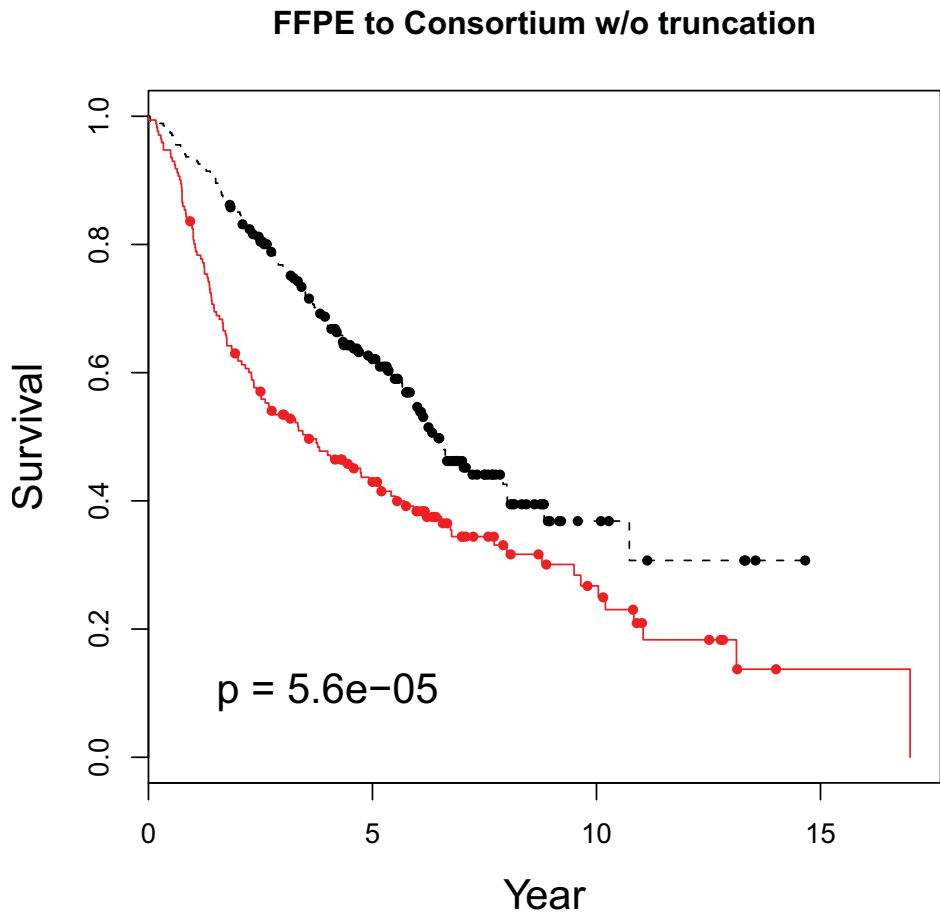

Figure 20: Kaplan Meier plots of survival, with groups predicted from FFPE to Consortium w/o truncation

```
> display.surv(subset = which(!is.na(beer.clin$year)) & beer.clin$dat.SITE ==
+ "MSKCC"), main = "FFPE to MSKCC w/o truncation", tx = 3)
```

```
Call: survfit(formula = Surv(beer.clin$year, beer.clin$death) ~ fit$v.pred.1df,
subset = subset)
```

|                   | records | n.max | n.start | events | median | 0.95LCL | 0.95UCL |
|-------------------|---------|-------|---------|--------|--------|---------|---------|
| fit\$v.pred.1df=1 | 72      | 72    | 72      | 20     | NA     | 5.67    | NA      |
| fit\$v.pred.1df=2 | 32      | 32    | 32      | 19     | 4.75   | 2.00    | NA      |

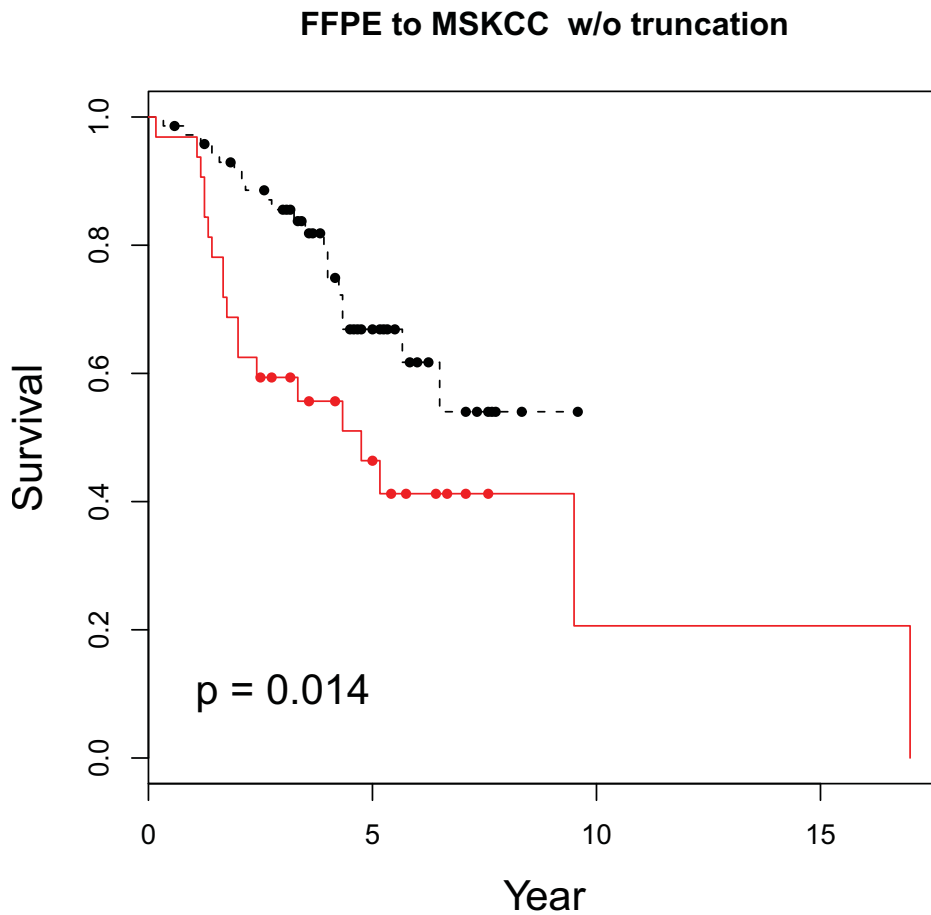

Figure 21: Kaplan Meier plots of survival, with groups predicted from FFPE to MSKCC

```
> display.surv(subset = which(!is.na(beer.clin$year)) & beer.clin$dat.SITE ==
+ "DFCI"), main = "FFPE to DFCI w/o truncation")
```

```
Call: survfit(formula = Surv(beer.clin$year, beer.clin$death) ~ fit$v.pred.1df,
subset = subset)
```

|                   | records | n.max | n.start | events | median | 0.95LCL | 0.95UCL |
|-------------------|---------|-------|---------|--------|--------|---------|---------|
| fit\$v.pred.1df=1 | 63      | 63    | 63      | 24     | 7.92   | 5.917   | NA      |
| fit\$v.pred.1df=2 | 19      | 19    | 19      | 11     | 5.42   | 0.833   | NA      |

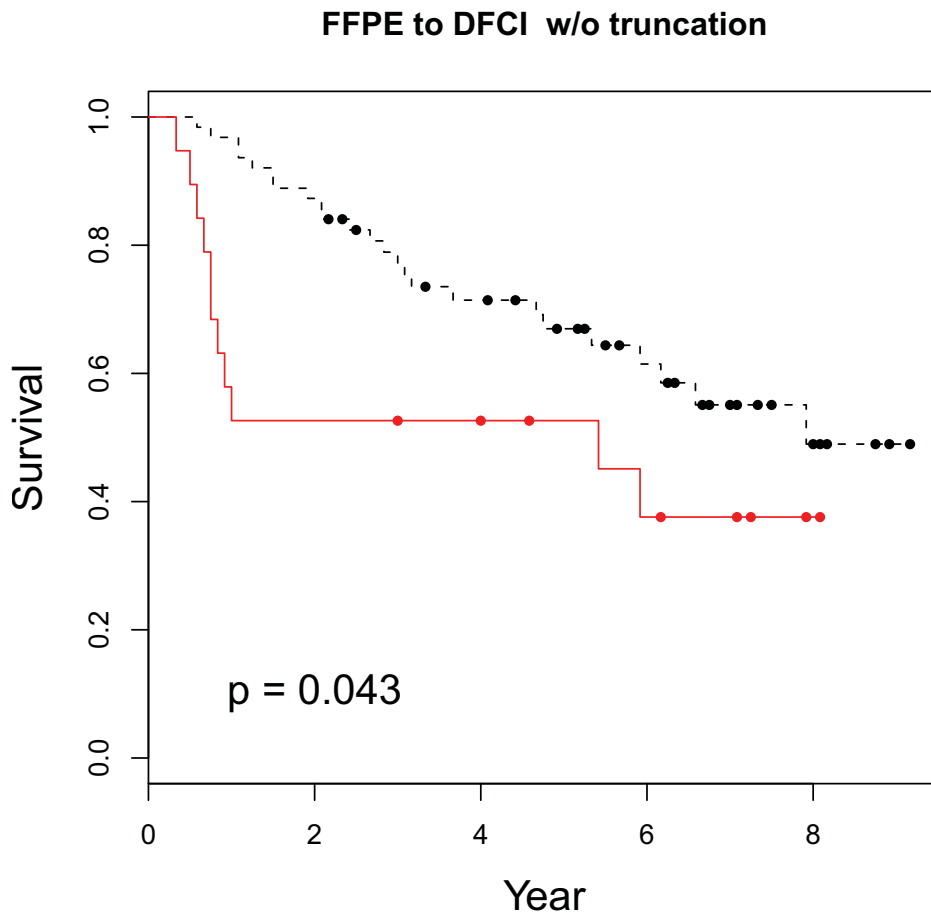

Figure 22: Kaplan Meier plots of survival, with groups predicted from FFPE to DFCI

```
> display.surv(subset = which(!is.na(beer.clin$year)) & beer.clin$dat.SITE ==
+ "MI"), main = "FFPE to MI w/o truncation", tx = 3)
```

```
Call: survfit(formula = Surv(beer.clin$year, beer.clin$death) ~ fit$v.pred.1df,
subset = subset)
```

|                   | records | n.max | n.start | events | median | 0.95LCL | 0.95UCL |
|-------------------|---------|-------|---------|--------|--------|---------|---------|
| fit\$v.pred.1df=1 | 89      | 89    | 89      | 41     | 6.62   | 5.66    | NA      |
| fit\$v.pred.1df=2 | 86      | 86    | 86      | 61     | 4.00   | 2.52    | 6.77    |

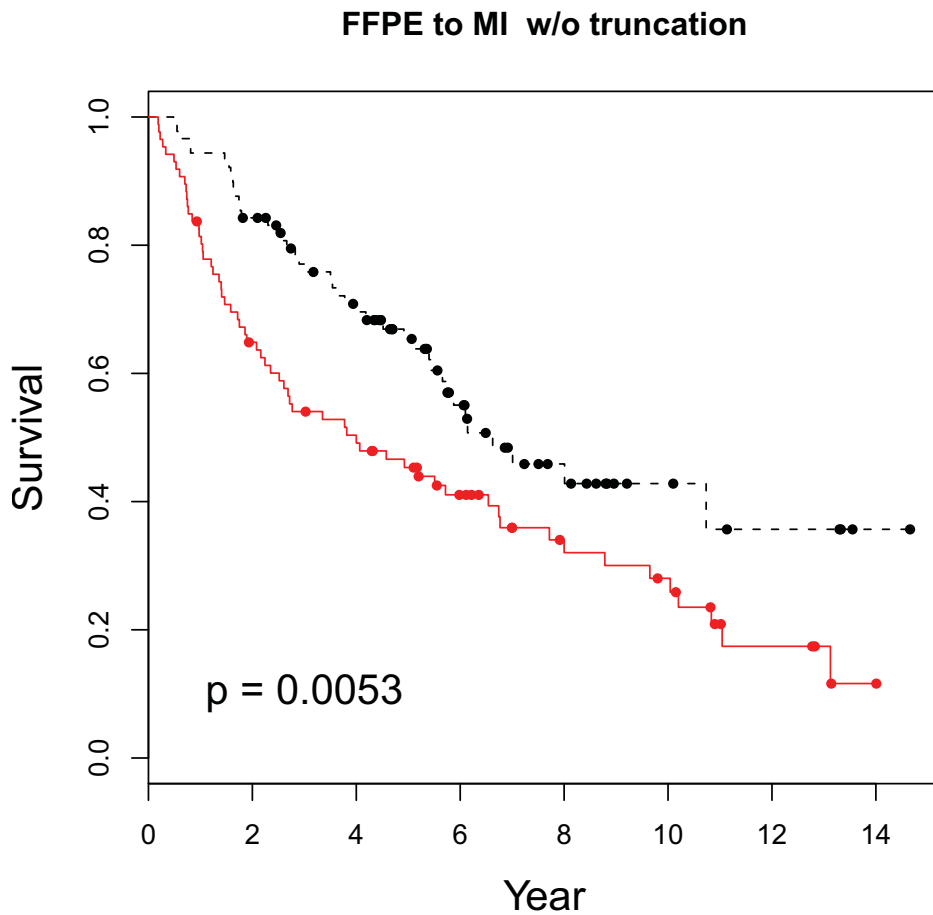

Figure 23: Kaplan Meier plots of survival, with groups predicted from FFPE to MI



```
> display.surv(subset = which(!is.na(beer.clin$year)) & beer.clin$dat.SITE ==
+ "HLM"), main = "FFPE to HLM w/o truncation")
```

```
Call: survfit(formula = Surv(beer.clin$year, beer.clin$death) ~ fit$v.pred.1df,
subset = subset)
```

|                   | records | n.max | n.start | events | median | 0.95LCL | 0.95UCL |
|-------------------|---------|-------|---------|--------|--------|---------|---------|
| fit\$v.pred.1df=1 | 45      | 45    | 45      | 35     | 3.70   | 2.47    | 6.31    |
| fit\$v.pred.1df=2 | 34      | 34    | 34      | 25     | 2.43   | 1.65    | 4.73    |

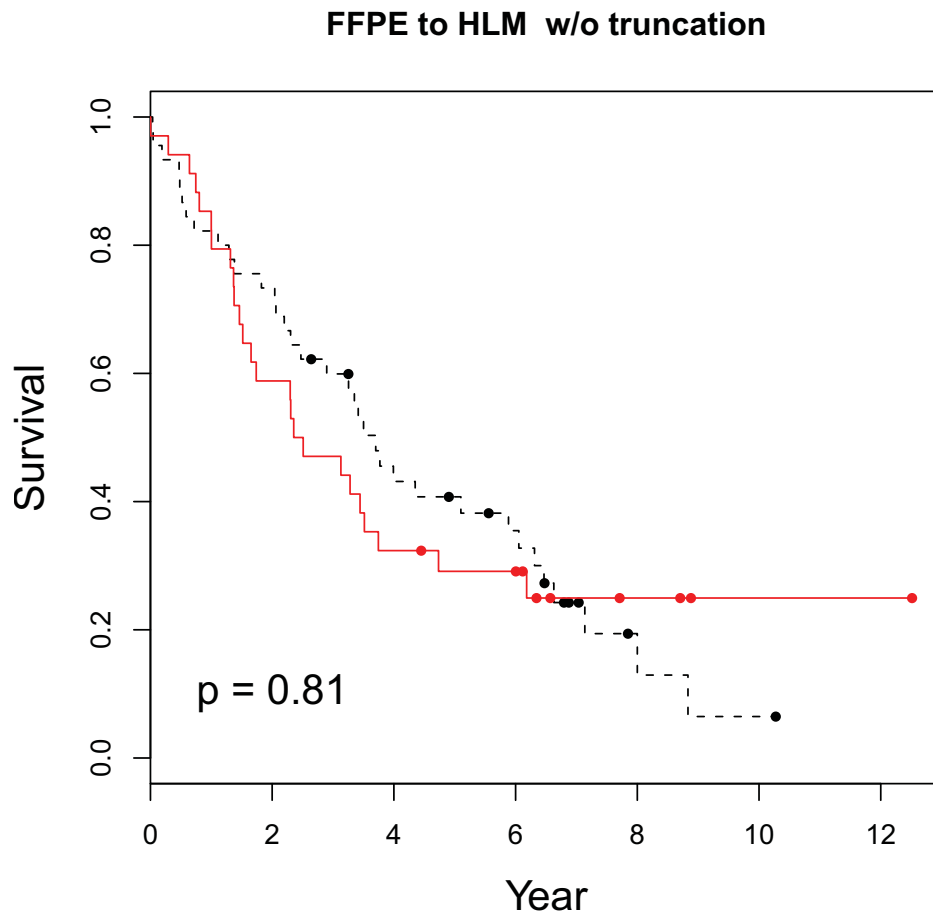

Figure 24: Kaplan Meier plots of survival, with groups predicted from FFPE to HLM

## 10 Survival analysis for individual genes

In this section, we did the survival analysis for individual genes, and compared the HR between FFPE and Consortium data, and each individual site of the Consortium.

```
> coxph.beer <- function(x, subset) {
+   summary(coxph(Surv(beer.clin$year, beer.clin$death) ~ unlist(x),
+     subset = subset))$coef
+ }
> coxph.ffpe <- function(x) {
+   summary(coxph(Surv(Death_Time, Death_Event) ~ unlist(x), data = clin))$coef
+ }
> beer.coef <- t(apply(beer.expr, 1, coxph.beer, subset = which(beer.clin$year <
+   7)))
> hist(beer.coef[, 5], nclass = 50)
> ffpe.coef <- t(apply(ffpe.expr, 1, coxph.ffpe))
> hist(ffpe.coef[, 5], nclass = 50)
> length(intersect(which(beer.coef[, 5] < 0.05), which(ffpe.coef[, 5] <
+   0.05)))

[1] 59

> length(setdiff(which(beer.coef[, 5] < 0.05), which(ffpe.coef[, 5] <
+   0.05)))

[1] 307

> length(setdiff(which(ffpe.coef[, 5] < 0.05), which(beer.coef[, 5] <
+   0.05)))

[1] 62

> gene.info <- read.csv("gene_info.csv")
> head(gene.info)

      Affy.ID Accession Symbol
1  AFFX-BioB-5_at   J04423
2  AFFX-BioB-M_at   U00096
3  AFFX-BioB-3_at   U00096
4  AFFX-BioC-5_at   U00096
5  AFFX-BioC-3_at   J04423
6  AFFX-BioDn-5_at  U00096

> out <- data.frame(ffpe.coef[, c(1, 2, 5)], beer.coef[, c(1, 2, 5)])
> colnames(out) <- c("ffpe.coef", "ffpe.HR", "ffpe.pv", "beer.coef",
+   "beer.HR", "beer.pv")
> head(out)
```

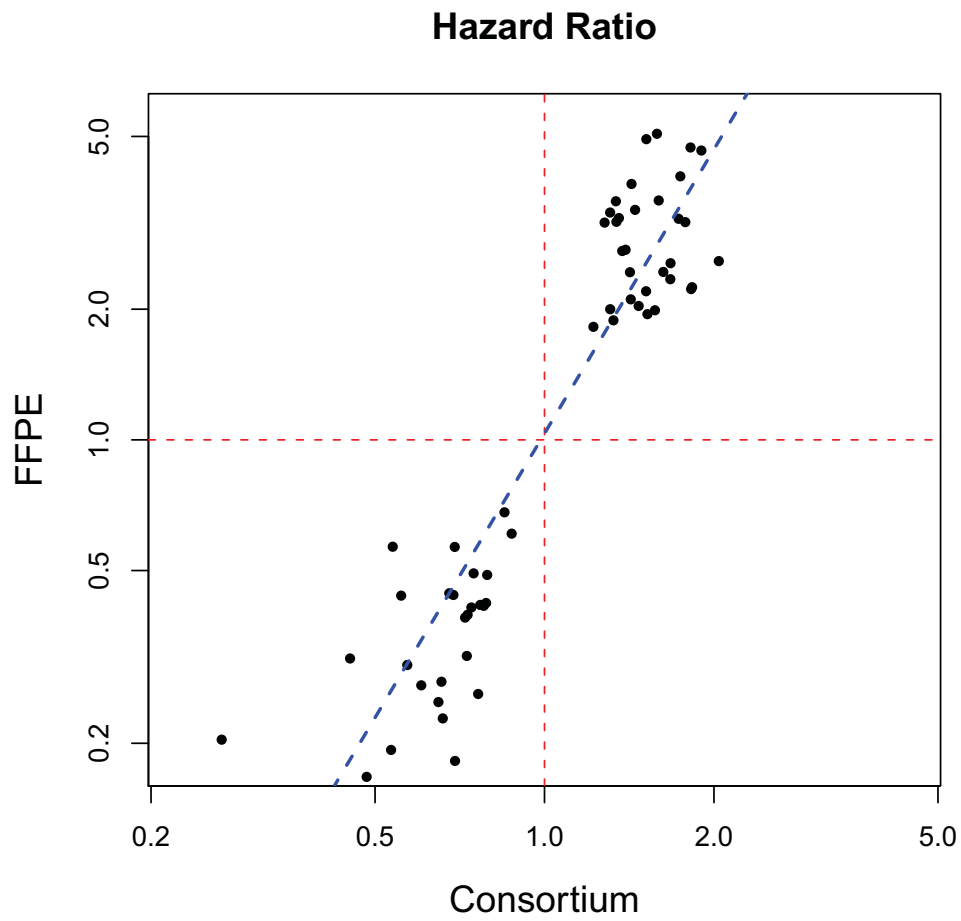

Figure 25: HR comparison between FFPE and Consortium

```

      ffpe.coef  ffpe.HR  ffpe.pv  beer.coef  beer.HR  beer.pv
1007_s_at  -0.43073807  0.6500291  0.2303817 -0.112608926  0.8935000  0.38405896
1316_at    -0.70127004  0.4959550  0.1029630 -0.031518456  0.9689731  0.78846129
200004_at  -0.04396638  0.9569861  0.8758638 -0.498065271  0.6077053  0.03048689
200007_at   0.32310218  1.3814065  0.5378768 -0.154367380  0.8569571  0.41758612
200012_x_at 0.27403627  1.3152625  0.5534911  0.255823805  1.2915251  0.19895556
200015_s_at -0.81764306  0.4414710  0.1854671 -0.003755492  0.9962516  0.98580058

```

```

> out <- merge(gene.info, out, by.x = "Affy.ID", by.y = "row.names")
> write.csv(out[out$ffpe.pv < 0.05 & out$beer.pv < 0.05, ], "59 genes.csv",
+   row.names = F)

```

## 11 Conclusions

## 12 Appendix

This computation was performed in the following environment:

```
> sessionInfo()
```

```
R version 2.10.0 (2009-10-26)
i386-pc-mingw32
```

locale:

```
[1] LC_COLLATE=English_United States.1252 LC_CTYPE=English_United States.1252
[3] LC_MONETARY=English_United States.1252 LC_NUMERIC=C
[5] LC_TIME=English_United States.1252
```

attached base packages:

```
[1] splines  stats      graphics  grDevices  utils      datasets  methods  base
```

other attached packages:

```
[1] preprocessCore_1.8.0 affy_1.24.2      Biobase_2.6.1      superpc_1.06
[5] survival_2.35-8
```

loaded via a namespace (and not attached):

```
[1] affyio_1.14.0 tools_2.10.0
```

# Predict Prognosis Using Refined Gene Signature

## 1 Introduction

In this particular report, we apply the 59-gene signature developed from FFPE and Consortium datasets to prediction the lung cancer prognosis in Bild et al (Nature 2006) and Bhattacharjee et al (PNAS 2001) datasets.

The Bild et al (Nature 2006) dataset was download from GEO website.

Both gene expression and clinical information of Bhattacharjee et al (PNAS 2001) dataset was download from the supplimentary matrials of the Bhattacharjee et al (2001) from PNAS website.

## 2 Getting Ready

We use these libraries:

```
> library(survival)
> library(superpc)
> library(affy)
> library(preprocessCore)
> pv.expr <- function(x, digits = 1) {
+   if (!x)
+     return(0)
+   exponent <- floor(log10(x))
+   base <- round(x/10^exponent, digits)
+   ifelse(x > 1e-06, paste("p = ", base * (10^exponent), sep = ""),
+     paste("p = ", base, "E", exponent, sep = ""))
+ }
> par(mar = c(4, 4, 3, 1), mfrow = c(1, 1))
```

## 3 Predict lung cancer patients' survival in Bhattacharjee et al dataset

In this section, we use the 59-gene signature developed from FFPE and Consortium datasets to prediction the lung cancer prognosis in Bhattacharjee et al (PNAS 2001) dataset.

Read FFPE data.

```
> ffpe.clin <- read.csv("FFPE.clin.csv", row.names = 1)
> head(ffpe.clin)
```

|               | Specimen.Number | SPOR.N | Histology      | Final.Pat.Stage | Time_to_Progression |
|---------------|-----------------|--------|----------------|-----------------|---------------------|
| AGRO8.564.CEL | MDA5            | 1724   | Squamous       | IIA             | 2.3846680           |
| AGRO8.567.CEL | MDA9            | 1663   | Adenocarcinoma | IB              | 2.2642026           |
| AGRO8.568.CEL | MDA10           | 1623   | Squamous       | IIIB            | 0.3778234           |
| AGRO8.571.CEL | MDA14           | 1576   | Adenocarcinoma | IIB             | 2.8199863           |
| AGRO8.574.CEL | MDA18           | 1547   | Adenocarcinoma | IIB             | 2.8966461           |
| AGRO8.576.CEL | MDA20           | 1537   | Adenocarcinoma | IB              | 2.1300479           |

|               | Progression | Death_Time | Death_Event | stage |
|---------------|-------------|------------|-------------|-------|
| AGRO8.564.CEL | 0           | 2.384668   | 0           | 2     |
| AGRO8.567.CEL | 0           | 2.264203   | 0           | 1     |
| AGRO8.568.CEL | 1           | 1.404517   | 1           | 3     |
| AGRO8.571.CEL | 0           | 2.819986   | 0           | 2     |
| AGRO8.574.CEL | 1           | 2.896646   | 0           | 2     |
| AGRO8.576.CEL | 0           | 2.130048   | 0           | 1     |

```
> dim(ffpe.clin)
```

```
[1] 55 9
```

```
> clin <- ffpe.clin
```

```
> ffpe.fitted <- read.csv("selected_data_norm_b0.csv", row.names = 1)
```

```
> dim(ffpe.fitted)
```

```
[1] 1400 55
```

```
> expr <- ffpe.fitted[, rownames(clin)]
```

```
> dim(expr)
```

```
[1] 1400 55
```

```
> all(rownames(clin) == colnames(expr))
```

```
[1] TRUE
```

Read Bhattacharjee data. The expression data has been reduced to only the 59 probes that are corresponding the 59-gene signature.

```
> pnas.clin.dat <- read.csv("clin.Bhattacharjee.csv", row.names = 1)
```

```
> pnas.expr <- read.csv("expr.Bhattacharjee.csv", row.names = 1)
```

```
> head(pnas.clin.dat)
```

|      | Survival | Sex | Smoking | Summary.Stage | Censor     | stage | dead |
|------|----------|-----|---------|---------------|------------|-------|------|
| A7   | 14.1     | M   | 2.5     | <NA>          | Uncensored | NA    | 1    |
| A8   | 72.4     | F   | 40.0    | IA            | Censored   | 1     | 0    |
| A9   | 66.2     | M   | 40.0    | IA            | Censored   | 1     | 0    |
| A12  | 21.9     | F   | 75.0    | IIB           | Uncensored | 2     | 1    |
| A13  | 49.6     | M   | 25.0    | IA            | Uncensored | 1     | 1    |
| A195 | 76.6     | f   | 10.0    | IB            | Censored   | 1     | 0    |

```
> dim(pnas.clin.dat)
```

```
[1] 203 7
> dim(pnas.expr)
[1] 45 203
> pnas.clin <- pnas.clin.dat[colnames(pnas.expr), ]
> pnas.clin$year <- pnas.clin$Survival/12
> which(rownames(pnas.clin) != colnames(pnas.expr))
integer(0)
```

Align and normalize FFPE and Bhattacharjee expression datasets.

```
> g59 <- read.csv("59 genes.csv", row.names = 1)
> head(g59, 2)
      Accession Symbol ffpe.coef  ffpe.HR  ffpe.pv beer.coef  beer.HR
200080_s_at NM_002107 H3F3A -1.194011 0.3030034 0.03408396 -0.5612282 0.5705079
200775_s_at NM_031263 HNRNPK  1.172992 3.2316484 0.01769802  0.5485713 1.7307785
      beer.pv
200080_s_at 0.01900127
200775_s_at 0.01928427
> ffpe.expr <- expr[rownames(g59), ]
> dim(ffpe.expr)
[1] 59 55
> rownames(ffpe.expr) <- g59$Symbol
> cb.expr <- data.frame(ffpe.expr[rownames(pnas.expr), ], pnas.expr)
> dim(cb.expr)
[1] 45 258
> site <- c(rep("FFPE", dim(ffpe.expr)[2]), rep("pnas", dim(pnas.expr)[2]))
> cb.expr[] <- normalize.quantiles(as.matrix(cb.expr))
> ffpe.expr <- cb.expr[, site == "FFPE"]
> pnas.expr <- cb.expr[, site != "FFPE"]
```

Build prediction model from FFPE data and predict the lung cancer patients' survival in Bhattacharjee et al dataset.

```
> data.train <- list(x = ffpe.expr, y = clin$Death_Time, censoring.status = clin$Death_Event,
+   featurenames = rownames(ffpe.expr))
> train.obj <- superpc.train(data.train, type = "survival")
> head(pnas.clin)
```

|      | Survival | Sex | Smoking | Summary.Stage | Censor     | stage | dead | year     |
|------|----------|-----|---------|---------------|------------|-------|------|----------|
| A7   | 14.1     | M   | 2.5     | <NA>          | Uncensored | NA    | 1    | 1.175000 |
| A8   | 72.4     | F   | 40.0    | IA            | Censored   | 1     | 0    | 6.033333 |
| A9   | 66.2     | M   | 40.0    | IA            | Censored   | 1     | 0    | 5.516667 |
| A12  | 21.9     | F   | 75.0    | IIB           | Uncensored | 2     | 1    | 1.825000 |
| A13  | 49.6     | M   | 25.0    | IA            | Uncensored | 1     | 1    | 4.133333 |
| A195 | 76.6     | f   | 10.0    | IB            | Censored   | 1     | 0    | 6.383333 |

```
> data.test <- list(x = pnas.expr, y = pnas.clin$year, censoring.status = pnas.clin$dead,
+   featurenames = NULL)
> fit <- superpc.predict(train.obj, data.train, data.test, threshold = 1,
+   prediction.type = "discrete")
> table(fit$v.pred.1df)
```

```
 1  2
138 65
```

```
> risk <- superpc.predict(train.obj, data.train, data.test, threshold = 1,
+   prediction.type = "continuous")$v.pred.1df
> subset <- which(pnas.clin$year < 7)
> summary(coxph(Surv(pnas.clin$year, pnas.clin$dead) ~ fit$v.pred.1df,
+   subset = subset))
```

Call:

```
coxph(formula = Surv(pnas.clin$year, pnas.clin$dead) ~ fit$v.pred.1df,
      subset = subset)
```

n= 117

```
              coef exp(coef) se(coef)      z Pr(>|z|)
fit$v.pred.1df 0.5932      1.8097  0.2499 2.373  0.0176 *
```

---

Signif. codes: 0 '\*\*\*' 0.001 '\*\*' 0.01 '\*' 0.05 '.' 0.1 ' ' 1

```
              exp(coef) exp(-coef) lower .95 upper .95
fit$v.pred.1df      1.810      0.5526      1.109      2.954
```

Rsquare= 0.044 (max possible= 0.993 )

Likelihood ratio test= 5.31 on 1 df, p=0.02122

Wald test = 5.63 on 1 df, p=0.01763

Score (logrank) test = 5.8 on 1 df, p=0.01607

```
> surv.fit <- survfit(Surv(pnas.clin$year, pnas.clin$dead) ~ fit$v.pred.1df,
+   subset = subset)
> print(surv.fit)
```

```
Call: survfit(formula = Surv(pnas.clin$year, pnas.clin$dead) ~ fit$v.pred.1df,
      subset = subset)
```

```
              records n.max n.start events median 0.95LCL 0.95UCL
fit$v.pred.1df=1      82    82     82    43  4.07    2.93    NA
fit$v.pred.1df=2      35    35     35    26  2.02    1.27    3.93
```

```
> logrank <- survdiff(Surv(pnas.clin$year, pnas.clin$dead) ~ fit$v.pred.1df,
+   subset = subset)
> logrank
```



Call:

```
survdifff(formula = Surv(pnas.clin$year, pnas.clin$dead) ~ fit$v.pred.1df,
  subset = subset)
```

|                   | N  | Observed | Expected | (O-E) <sup>2</sup> /E | (O-E) <sup>2</sup> /V |
|-------------------|----|----------|----------|-----------------------|-----------------------|
| fit\$v.pred.1df=1 | 82 | 43       | 51.6     | 1.44                  | 5.78                  |
| fit\$v.pred.1df=2 | 35 | 26       | 17.4     | 4.28                  | 5.78                  |

Chisq= 5.8 on 1 degrees of freedom, p= 0.0162

```
> pv <- pchisq(logrank$chisq, 1, lower.tail = F)
> pnas.clin$gender <- NA
> pnas.clin$gender[pnas.clin$Sex == "M"] <- "M"
> pnas.clin$gender[pnas.clin$Sex == "m"] <- "M"
> pnas.clin$gender[pnas.clin$Sex == "F"] <- "F"
> pnas.clin$gender[pnas.clin$Sex == "f"] <- "F"
> table(pnas.clin$gender)
```

```
F M
72 53
```

```
> summary(coxph(Surv(pnas.clin$year, pnas.clin$dead) ~ risk + gender +
+ Smoking, data = pnas.clin, subset = subset))
```

Call:

```
coxph(formula = Surv(pnas.clin$year, pnas.clin$dead) ~ risk +
  gender + Smoking, data = pnas.clin, subset = subset)
```

n=115 (2 observations deleted due to missingness)

|         | coef       | exp(coef) | se(coef)  | z      | Pr(> z ) |
|---------|------------|-----------|-----------|--------|----------|
| risk    | 0.3294649  | 1.3902240 | 0.1289459 | 2.555  | 0.0106 * |
| genderM | 0.0795014  | 1.0827471 | 0.2494269 | 0.319  | 0.7499   |
| Smoking | -0.0001487 | 0.9998513 | 0.0037220 | -0.040 | 0.9681   |

---

Signif. codes: 0 '\*\*\*' 0.001 '\*\*' 0.01 '\*' 0.05 '.' 0.1 ' ' 1

|         | exp(coef) | exp(-coef) | lower .95 | upper .95 |
|---------|-----------|------------|-----------|-----------|
| risk    | 1.3902    | 0.7193     | 1.0798    | 1.790     |
| genderM | 1.0827    | 0.9236     | 0.6641    | 1.765     |
| Smoking | 0.9999    | 1.0001     | 0.9926    | 1.007     |

Rsquare= 0.056 (max possible= 0.993 )

Likelihood ratio test= 6.62 on 3 df, p=0.08487

Wald test = 6.55 on 3 df, p=0.08764

Score (logrank) test = 6.62 on 3 df, p=0.0852

```
> plot(surv.fit, col = 1:2, lty = c(2, 1), xlab = "Year", ylab = "Survival",
+ mark = 20, cex.lab = 1.5, main = "59 genes, FFPE to Bhattacharjee et al dataset")
> text(2, 0.2, pv.expr(pv), cex = 1.5)
```

```
> plot(surv.fit, col = 1:2, lty = c(2, 1), xlab = "Year", ylab = "Survival",
+      mark = 20, cex.lab = 1.5, main = "59 genes, FFPE to Bhattacharjee et al dataset")
> text(2, 0.2, pv.expr(pv), cex = 1.5)
```

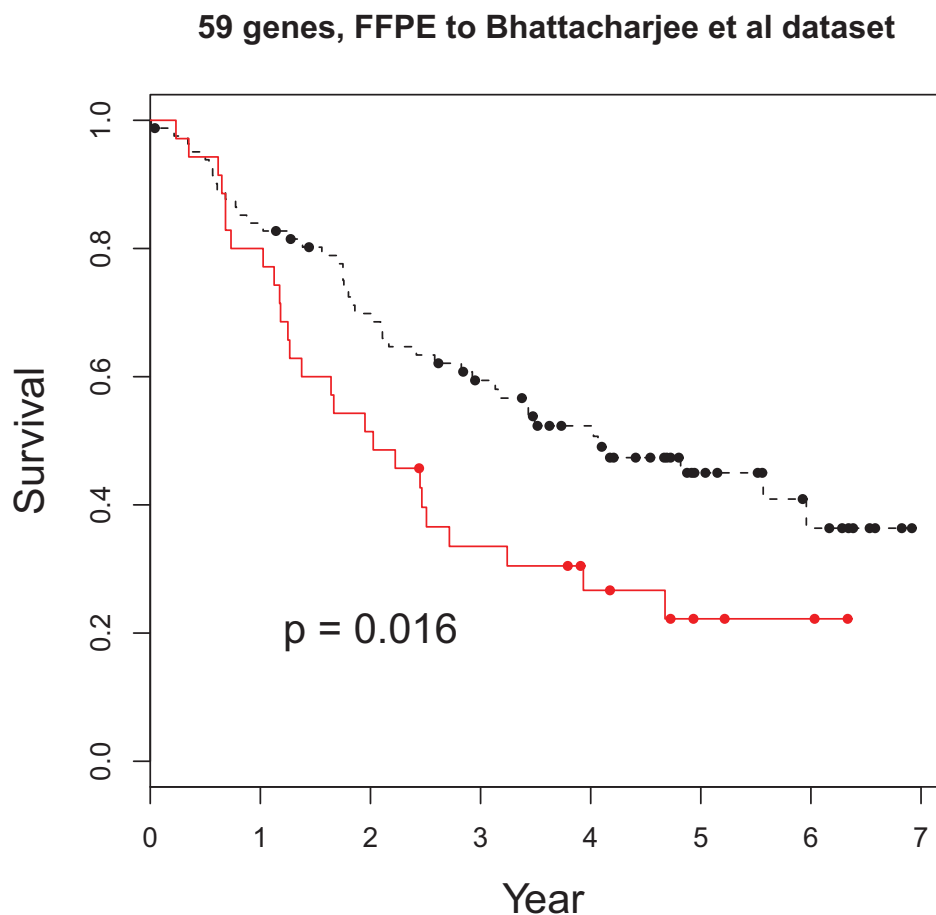

Kaplan Meier plots of survival for high and low risk group in Bhattacharjee et al dataset predicted from 59-gene signature

Predict the lung cancer stage I patients' survival in Bhattacharjee et al dataset.

```
> subset <- which(pnas.clin$year < 7 & pnas.clin$stage == 1)
> surv.fit <- survfit(Surv(pnas.clin$year, pnas.clin$dead) ~ fit$v.pred.1df,
+   subset = subset)
> print(surv.fit)
```

```
Call: survfit(formula = Surv(pnas.clin$year, pnas.clin$dead) ~ fit$v.pred.1df,
  subset = subset)
```

```
records n.max n.start events median 0.95LCL 0.95UCL
```

```
fit$v.pred.1df=1      53   53   53   22  5.96   4.07   NA
fit$v.pred.1df=2      17   17   17   11  1.95   1.18   NA
```

```
> logrank <- survdiff(Surv(pnas.clin$year, pnas.clin$dead) ~ fit$v.pred.1df,
+   subset = subset)
> logrank
```

Call:

```
survdiff(formula = Surv(pnas.clin$year, pnas.clin$dead) ~ fit$v.pred.1df,
  subset = subset)
```

|                   | N  | Observed | Expected | (O-E) <sup>2</sup> /E | (O-E) <sup>2</sup> /V |
|-------------------|----|----------|----------|-----------------------|-----------------------|
| fit\$v.pred.1df=1 | 53 | 22       | 26.65    | 0.812                 | 4.25                  |
| fit\$v.pred.1df=2 | 17 | 11       | 6.35     | 3.409                 | 4.25                  |

Chisq= 4.3 on 1 degrees of freedom, p= 0.0392

```
> pv <- pchisq(logrank$chisq, 1, lower.tail = F)
```

```
> plot(surv.fit, col = 1:2, lty = c(2, 1), xlab = "Year", ylab = "Survival",
+   mark = 20, cex.lab = 1.5, main = "59 genes, FFPE to Bhattacharjee et al dataset, stage I")
> text(2, 0.2, pv.expr(pv), cex = 1.5)
```

```
> plot(surv.fit, col = 1:2, lty = c(2, 1), xlab = "Year", ylab = "Survival",
+   mark = 20, cex.lab = 1.5, main = "59 genes, FFPE to Bhattacharjee et al dataset, stage I")
> text(2, 0.2, pv.expr(pv), cex = 1.5)
```

### 59 genes, FFPE to Bhattacharjee et al dataset, stage I

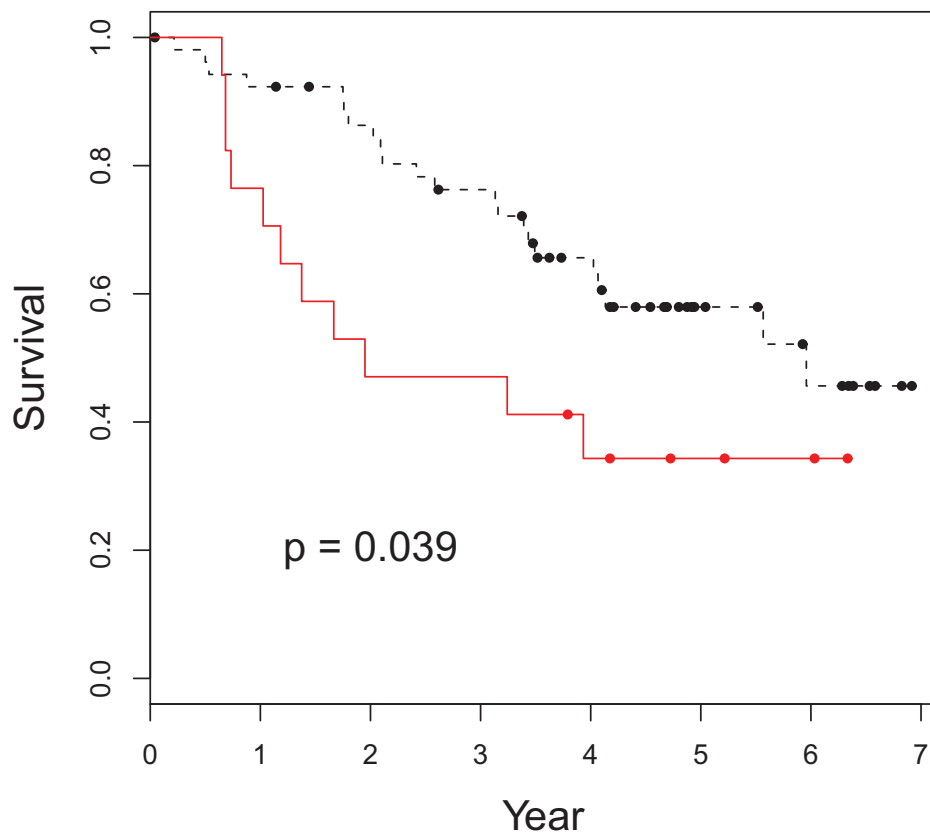

Kaplan Meier plots of survival for high and low risk group of stage I patients in Bhattacharjee et al dataset predicted from 59-gene signature

```
> subset <- which(pnas.clin$year < 7 & pnas.clin$stage == 1)
> summary(coxph(Surv(pnas.clin$year, pnas.clin$dead) ~ risk + gender +
+   Smoking, data = pnas.clin, subset = subset))
```

Call:

```
coxph(formula = Surv(pnas.clin$year, pnas.clin$dead) ~ risk +
      gender + Smoking, data = pnas.clin, subset = subset)
```

n= 70

|         | coef       | exp(coef) | se(coef)  | z      | Pr(> z ) |
|---------|------------|-----------|-----------|--------|----------|
| risk    | 0.4410060  | 1.5542701 | 0.1991547 | 2.214  | 0.0268 * |
| genderM | 0.2638568  | 1.3019417 | 0.3582436 | 0.737  | 0.4614   |
| Smoking | -0.0005453 | 0.9994548 | 0.0056967 | -0.096 | 0.9237   |

---

Signif. codes: 0 '\*\*\*' 0.001 '\*\*' 0.01 '\*' 0.05 '.' 0.1 ' ' 1

|         | exp(coef) | exp(-coef) | lower .95 | upper .95 |
|---------|-----------|------------|-----------|-----------|
| risk    | 1.5543    | 0.6434     | 1.0520    | 2.296     |
| genderM | 1.3019    | 0.7681     | 0.6451    | 2.627     |
| Smoking | 0.9995    | 1.0005     | 0.9884    | 1.011     |

Rsquare= 0.073 (max possible= 0.973 )

Likelihood ratio test= 5.28 on 3 df, p=0.1524

Wald test = 5.12 on 3 df, p=0.1634

Score (logrank) test = 5.2 on 3 df, p=0.1576

```
> pnas.clin.sub <- pnas.clin[!is.na(pnas.clin$year + pnas.clin$dead),
+ ]
> table(pnas.clin.sub$stage)
```

```
 1  2  3  4
76 24 10  3
```

```
> table(pnas.clin$stage)
```

```
 1  2  3  4
76 24 10  3
```

Build prediction model from Consortium data and predict the lung cancer patients' survival in Bhattacharjee et al dataset.

```
> pnas.clin <- read.csv("clin.Bhattacharjee.csv", row.names = 1)
> pnas.expr <- read.csv("expr.Bhattacharjee.csv", row.names = 1)
> dim(pnas.expr)
```

```
[1] 45 203
```

```
> pnas.clin$year <- pnas.clin$Survival/12
> table(pnas.clin$dead, pnas.clin$Censor)
```

|   | censored | Censored | NA- | uncensored | Uncensored |
|---|----------|----------|-----|------------|------------|
| 0 | 0        | 42       | 12  | 0          | 0          |
| 1 | 0        | 0        | 0   | 51         | 20         |

```
> pnas.expr <- pnas.expr[, rownames(pnas.clin)]
> which(rownames(pnas.clin) != colnames(pnas.expr))
```

```
integer(0)
```

```
> beer.clin.dat <- read.csv("Consortium.clin.csv", row.names = 1)
> beer.expr <- read.csv("Consortium.expr.csv", row.names = 1)
> beer.clin <- beer.clin.dat[colnames(beer.expr), ]
> which(rownames(beer.clin) != colnames(beer.expr))
```

```

integer(0)

> dim(beer.clin)

[1] 442 10

> dim(beer.expr)

[1] 1012 442

> g59 <- read.csv("59 genes.csv", row.names = 1)
> head(g59, 2)

      Accession Symbol ffpe.coef  ffpe.HR  ffpe.pv beer.coef  beer.HR
200080_s_at NM_002107  H3F3A -1.194011 0.3030034 0.03408396 -0.5612282 0.5705079
200775_s_at NM_031263  HNRNPK  1.172992 3.2316484 0.01769802  0.5485713 1.7307785
      beer.pv
200080_s_at 0.01900127
200775_s_at 0.01928427

> beer.expr <- beer.expr[rownames(g59), ]
> dim(beer.expr)

[1] 59 442

> rownames(beer.expr) <- g59$Symbol
> cb.expr <- data.frame(beer.expr[rownames(pnas.expr), ], pnas.expr)
> dim(cb.expr)

[1] 45 645

> site <- c(rep("beer", dim(beer.expr)[2]), rep("pnas", dim(pnas.expr)[2]))
> cb.expr[] <- normalize.quantiles(as.matrix(cb.expr))
> beer.expr <- cb.expr[, site == "beer"]
> pnas.expr <- cb.expr[, site != "beer"]

> ind1 <- which(!is.na(beer.clin$year))
> length(ind1)

[1] 440

> data.train <- list(x = beer.expr[, ind1], y = beer.clin$year[ind1],
+   censoring.status = beer.clin$death[ind1], featurenames = NULL)
> train.obj <- superpc.train(data.train, type = "survival")
> head(pnas.clin)

      Survival Sex Smoking Summary.Stage  Censor stage dead  year
A7      14.1  M    2.5      <NA>  Uncensored  NA    1 1.175000
A8      72.4  F   40.0      IA  Censored    1    0 6.033333
A9      66.2  M   40.0      IA  Censored    1    0 5.516667
A12     21.9  F   75.0      IIB Uncensored  2    1 1.825000
A13     49.6  M   25.0      IA  Uncensored  1    1 4.133333
A195    76.6  f   10.0      IB  Censored    1    0 6.383333

```

```
> data.test <- list(x = pnas.expr, y = pnas.clin$year, censoring.status = pnas.clin$dead,
+   featurenames = NULL)
> fit <- superpc.predict(train.obj, data.train, data.test, threshold = 1,
+   prediction.type = "discrete")
> table(fit$v.pred.1df)
```

```
 1  2
115 88
```

```
> risk <- superpc.predict(train.obj, data.train, data.test, threshold = 1,
+   prediction.type = "continuous")$v.pred.1df
> pnas.clin$gender <- NA
> pnas.clin$gender[pnas.clin$Sex == "M"] <- "M"
> pnas.clin$gender[pnas.clin$Sex == "m"] <- "M"
> pnas.clin$gender[pnas.clin$Sex == "F"] <- "F"
> pnas.clin$gender[pnas.clin$Sex == "f"] <- "F"
> table(pnas.clin$gender)
```

```
 F  M
72 53
```

```
> subset <- which(pnas.clin$year < 7)
> length(which(!is.na(pnas.clin$year + pnas.clin$dead + pnas.clin$stage)))
```

```
[1] 113
```

```
> length(which(pnas.clin$year < 7))
```

```
[1] 117
```

```
> summary(coxph(Surv(pnas.clin$year, pnas.clin$dead) ~ risk + gender +
+   Smoking, data = pnas.clin, subset = subset))
```

Call:

```
coxph(formula = Surv(pnas.clin$year, pnas.clin$dead) ~ risk +
      gender + Smoking, data = pnas.clin, subset = subset)
```

n=115 (2 observations deleted due to missingness)

|         | coef       | exp(coef) | se(coef)  | z      | Pr(> z ) |
|---------|------------|-----------|-----------|--------|----------|
| risk    | 1.0040959  | 2.7294384 | 0.3925910 | 2.558  | 0.0105 * |
| genderM | 0.1048533  | 1.1105477 | 0.2518452 | 0.416  | 0.6772   |
| Smoking | -0.0004529 | 0.9995472 | 0.0037032 | -0.122 | 0.9027   |

---

Signif. codes: 0 '\*\*\*' 0.001 '\*\*' 0.01 '\*' 0.05 '.' 0.1 ' ' 1

|         | exp(coef) | exp(-coef) | lower .95 | upper .95 |
|---------|-----------|------------|-----------|-----------|
| risk    | 2.7294    | 0.3664     | 1.2644    | 5.892     |
| genderM | 1.1105    | 0.9005     | 0.6779    | 1.819     |
| Smoking | 0.9995    | 1.0005     | 0.9923    | 1.007     |

```

Rsquare= 0.054 (max possible= 0.993 )
Likelihood ratio test= 6.39 on 3 df, p=0.09423
Wald test = 6.59 on 3 df, p=0.08615
Score (logrank) test = 6.65 on 3 df, p=0.08397

> surv.fit <- survfit(Surv(pnas.clin$year, pnas.clin$dead) ~ fit$v.pred.1df,
+ subset = subset)
> print(surv.fit)

Call: survfit(formula = Surv(pnas.clin$year, pnas.clin$dead) ~ fit$v.pred.1df,
subset = subset)


```

|                   | records | n.max | n.start | events | median | 0.95LCL | 0.95UCL |
|-------------------|---------|-------|---------|--------|--------|---------|---------|
| fit\$v.pred.1df=1 | 74      | 74    | 74      | 38     | 4.13   | 3.16    | NA      |
| fit\$v.pred.1df=2 | 43      | 43    | 43      | 31     | 2.02   | 1.27    | 3.24    |

```

> logrank <- survdiff(Surv(pnas.clin$year, pnas.clin$dead) ~ fit$v.pred.1df,
+ subset = subset)
> pv <- pchisq(logrank$chisq, 1, lower.tail = F)

> plot(surv.fit, col = 1:2, lty = c(2, 1), xlab = "Year", ylab = "Survival",
+ mark = 20, cex.lab = 1.5, main = "59 genes, \nConsortium to Bhattacharjee et al dataset")
> text(2, 0.2, pv.expr(pv), cex = 1.5)

> plot(surv.fit, col = 1:2, lty = c(2, 1), xlab = "Year", ylab = "Survival",
+ mark = 20, cex.lab = 1.5, main = "59 genes, \nConsortium to Bhattacharjee et al dataset")
> text(2, 0.2, pv.expr(pv), cex = 1.5)

```



**59 genes,  
Consortium to Bhattacharjee et al dataset**

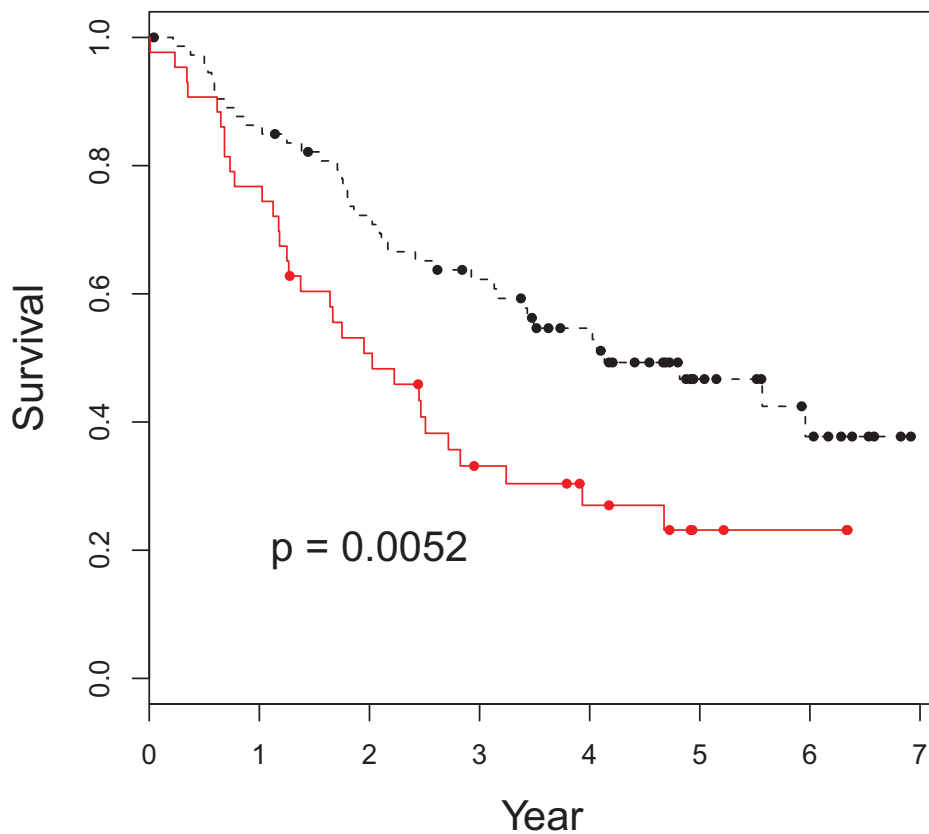

Kaplan Meier plots of survival for high and low risk group in Bhattacharjee et al dataset predicted from 59-gene signature

Now predict the survival time for stage I patients only.

```
> subset <- which(pnas.clin$year < 7 & pnas.clin$stage == 1)
> summary(coxph(Surv(pnas.clin$year, pnas.clin$dead) ~ risk + gender +
+   Smoking, data = pnas.clin, subset = subset))
```

Call:

```
coxph(formula = Surv(pnas.clin$year, pnas.clin$dead) ~ risk +
      gender + Smoking, data = pnas.clin, subset = subset)
```

n= 70

|      | coef     | exp(coef) | se(coef) | z     | Pr(> z ) |
|------|----------|-----------|----------|-------|----------|
| risk | 1.233445 | 3.433036  | 0.633187 | 1.948 | 0.0514 . |

```
genderM 0.275303 1.316929 0.362705 0.759 0.4478
Smoking -0.001319 0.998681 0.005815 -0.227 0.8205
```

```
---
```

```
Signif. codes:  0 '***' 0.001 '**' 0.01 '*' 0.05 '.' 0.1 ' ' 1
```

|         | exp(coef) | exp(-coef) | lower .95 | upper .95 |
|---------|-----------|------------|-----------|-----------|
| risk    | 3.4330    | 0.2913     | 0.9925    | 11.875    |
| genderM | 1.3169    | 0.7593     | 0.6469    | 2.681     |
| Smoking | 0.9987    | 1.0013     | 0.9874    | 1.010     |

```
Rsquare= 0.055 (max possible= 0.973 )
```

```
Likelihood ratio test= 3.98 on 3 df, p=0.2632
```

```
Wald test = 4.07 on 3 df, p=0.2536
```

```
Score (logrank) test = 4.1 on 3 df, p=0.2505
```

```
> surv.fit <- survfit(Surv(pnas.clin$year, pnas.clin$dead) ~ fit$v.pred.1df,
+ subset = subset)
> print(surv.fit)
```

```
Call: survfit(formula = Surv(pnas.clin$year, pnas.clin$dead) ~ fit$v.pred.1df,
subset = subset)
```

|                   | records | n.max | n.start | events | median | 0.95LCL | 0.95UCL |
|-------------------|---------|-------|---------|--------|--------|---------|---------|
| fit\$v.pred.1df=1 | 52      | 52    | 52      | 22     | 5.96   | 4.02    | NA      |
| fit\$v.pred.1df=2 | 18      | 18    | 18      | 11     | 2.60   | 1.18    | NA      |

```
> logrank <- survdiff(Surv(pnas.clin$year, pnas.clin$dead) ~ fit$v.pred.1df,
+ subset = subset)
> pv <- pchisq(logrank$chisq, 1, lower.tail = F)
```

```
> plot(surv.fit, col = 1:2, lty = c(2, 1), xlab = "Year", ylab = "Survival",
+ mark = 20, cex.lab = 1.5, main = "59 genes, \nConsortium to Bhattacharjee et al dataset, Stage I")
> text(2, 0.2, pv.expr(pv), cex = 1.5)
```

```
> plot(surv.fit, col = 1:2, lty = c(2, 1), xlab = "Year", ylab = "Survival",
+ mark = 20, cex.lab = 1.5, main = "59 genes, \nConsortium to Bhattacharjee et al dataset, Stage I")
> text(2, 0.2, pv.expr(pv), cex = 1.5)
```

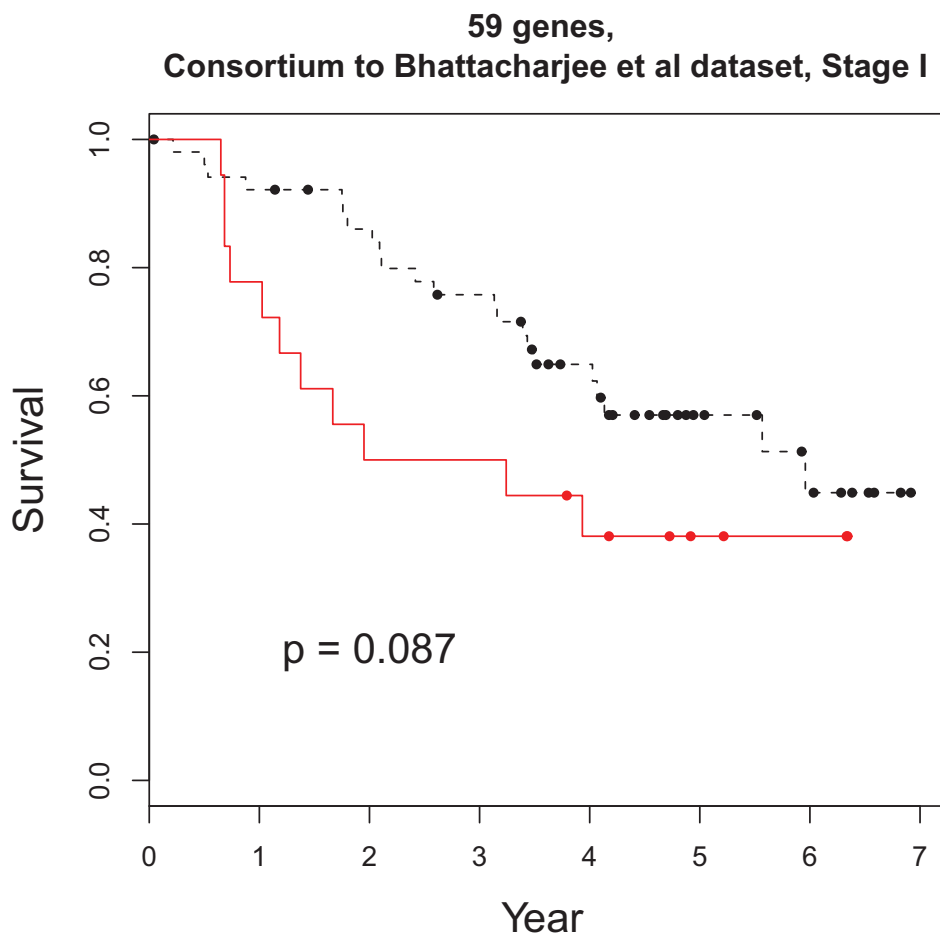

Kaplan Meier plots of survival for high and low risk group of stage I patients in Bhattacharjee et al dataset predicted from 59-gene signature

#### 4 Predict lung cancer patients survival in Bild et al dataset

In this section, we use the 59-gene signature developed from FFPE and Consortium datasets to prediction the lung cancer prognosis in Bild et al (Nature 2006) dataset.

Read FFPE data.

```
> ffpe.clin <- read.csv("FFPE.clin.csv", row.names = 1)
> head(ffpe.clin)
```

|               | Specimen.Number | SPOR.N | Histology      | Final.Pat.Stage | Time_to_Progression |
|---------------|-----------------|--------|----------------|-----------------|---------------------|
| AGR08.564.CEL | MDA5            | 1724   | Squamous       | IIA             | 2.3846680           |
| AGR08.567.CEL | MDA9            | 1663   | Adenocarcinoma | IB              | 2.2642026           |
| AGR08.568.CEL | MDA10           | 1623   | Squamous       | IIIB            | 0.3778234           |
| AGR08.571.CEL | MDA14           | 1576   | Adenocarcinoma | IIB             | 2.8199863           |

|               |             |            |                |       |           |
|---------------|-------------|------------|----------------|-------|-----------|
| AGR08.574.CEL | MDA18       | 1547       | Adenocarcinoma | IIB   | 2.8966461 |
| AGR08.576.CEL | MDA20       | 1537       | Adenocarcinoma | IB    | 2.1300479 |
|               | Progression | Death_Time | Death_Event    | stage |           |
| AGR08.564.CEL | 0           | 2.384668   | 0              | 2     |           |
| AGR08.567.CEL | 0           | 2.264203   | 0              | 1     |           |
| AGR08.568.CEL | 1           | 1.404517   | 1              | 3     |           |
| AGR08.571.CEL | 0           | 2.819986   | 0              | 2     |           |
| AGR08.574.CEL | 1           | 2.896646   | 0              | 2     |           |
| AGR08.576.CEL | 0           | 2.130048   | 0              | 1     |           |

```
> dim(ffpe.clin)
```

```
[1] 55 9
```

```
> clin <- ffpe.clin
```

```
> ffpe.fitted <- read.csv("selected_data_norm_b0.csv", row.names = 1)
```

```
> dim(ffpe.fitted)
```

```
[1] 1400 55
```

```
> expr <- ffpe.fitted[, rownames(clin)]
```

```
> dim(expr)
```

```
[1] 1400 55
```

```
> all(rownames(clin) == colnames(expr))
```

```
[1] TRUE
```

Read Bild data. The expression data has been reduced to only the 59 probes that are corresponding the 59-gene signature.

```
> duke.clin <- read.csv("Bild clin from database.csv", row.names = 1)
```

```
> duke.expr <- read.csv("./Bild et al/GSE3141_series_matrix.csv", row.names = 1)
```

```
> range(duke.expr)
```

```
[1] 0.1 302457.4
```

```
> gc()
```

|        | used (Mb) | gc trigger (Mb) | max used (Mb) |
|--------|-----------|-----------------|---------------|
| Ncells | 430779    | 11.6            | 984024        |
| Vcells | 6668965   | 50.9            | 22283078      |

```
> duke.expr[] <- log2(duke.expr)
```

```
> hist(as.matrix(duke.expr))
```

```
> range(duke.expr)
```

```
[1] -3.321928 18.206372
```

```
> head(duke.clin)
```

```

      Stage      Histology death month
GSM70202      I      Squamous      1  23.6
GSM70203     II Adenocarcinoma      0  41.7
GSM70219 <NA> Adenocarcinoma      1  39.0
GSM70204      I Adenocarcinoma      0  41.6
GSM70158     IV      Squamous      1   5.3
GSM70194     IA Adenocarcinoma      0  51.2

```

```
> dim(duke.clin)
```

```
[1] 111  4
```

```
> dim(duke.expr)
```

```
[1] 54675 111
```

```

> duke.clin <- duke.clin[colnames(duke.expr), ]
> duke.clin$year <- duke.clin$month/12
> duke.clin$dead <- duke.clin$death
> all(rownames(duke.clin) == colnames(duke.expr))

```

```
[1] TRUE
```

```

> duke.clin$stage <- NA
> table(duke.clin$Stage)

```

```

      I  IA  IB  II  IIA  IIB  IIIA  IV
2     7  29  26   1   4   11   4   1

```

```

> duke.clin$stage[duke.clin$Stage %in% c("I", "IA", "IB")] <- 1
> duke.clin$stage[duke.clin$Stage %in% c("II", "IIA", "IIB")] <- 2
> duke.clin$stage[duke.clin$Stage %in% c("IIIA")] <- 3
> duke.clin$stage[duke.clin$Stage %in% c("IV")] <- 4
> table(duke.clin$stage, duke.clin$Stage, useNA = "ifany")

```

```

      I  IA  IB  II  IIA  IIB  IIIA  IV <NA>
1     0  7  29  26   0   0   0   0  0
2     0  0  0  0   1   4  11   0  0
3     0  0  0  0   0   0   0   4  0
4     0  0  0  0   0   0   0   0  1
<NA>  2  0  0  0   0   0   0   0  26

```

Align and normalize FFPE and Bild expression datasets.

```

> g59 <- read.csv("59 genes.csv", row.names = 1)
> head(g59, 2)

```

```

      Accession Symbol ffpe.coef  ffpe.HR  ffpe.pv  beer.coef  beer.HR
200080_s_at NM_002107 H3F3A -1.194011 0.3030034 0.03408396 -0.5612282 0.5705079
200775_s_at NM_031263 HNRNPK  1.172992 3.2316484 0.01769802  0.5485713 1.7307785
      beer.pv
200080_s_at 0.01900127
200775_s_at 0.01928427

```

```

> ffpe.expr <- expr[rownames(g59), ]
> dim(ffpe.expr)

[1] 59 55

> range(ffpe.expr)

[1] 3.942112 14.821264

> head(rownames(duke.expr))

[1] "1007_s_at" "1053_at" "117_at" "121_at" "1255_g_at" "1294_at"

> length(intersect(rownames(ffpe.expr), rownames(duke.expr)))

[1] 59

> duke.expr <- duke.expr[rownames(ffpe.expr), ]
> all(rownames(ffpe.expr) == rownames(duke.expr))

[1] TRUE

> cb.expr <- data.frame(ffpe.expr, duke.expr)
> dim(cb.expr)

[1] 59 166

> site <- c(rep("FFPE", dim(ffpe.expr)[2]), rep("duke", dim(duke.expr)[2]))
> cb.expr[] <- normalize.quantiles(as.matrix(cb.expr))
> ffpe.expr <- cb.expr[, site == "FFPE"]
> duke.expr <- cb.expr[, site != "FFPE"]

```

Build prediction model from FFPE data and predict the lung cancer patients' survival in Bild et al dataset.

```

> data.train <- list(x = ffpe.expr, y = ffpe.clin$Death_Time, censoring.status = ffpe.clin$Death_Event,
+   featurenames = rownames(ffpe.expr))
> train.obj <- superpc.train(data.train, type = "survival")
> data.test <- list(x = duke.expr, y = duke.clin$year, censoring.status = duke.clin$dead,
+   featurenames = NULL)
> fit <- superpc.predict(train.obj, data.train, data.test, threshold = 1,
+   prediction.type = "discrete")
> table(fit$v.pred.1df)

 1  2
75 36

> attributes(fit)

$names
[1] "v.pred"          "u"                "d"                "which.features"
[5] "v.pred.1df"      "n.components"    "coef"            "call"
[9] "prediction.type"

```

```

> fit$coef

  score.1  score.2  score.3
-2.4476833  0.7506039  0.4273745

> fit$d

[1] 23.55970 10.73353 10.23920

> um <- data.frame(fit$u)
> rownames(um) <- names(which(fit$which.features))
> write.csv(um, "U matrix new.csv")
> risk <- NULL
> risk <- superpc.predict(train.obj, data.train, data.test, threshold = 1,
+   prediction.type = "continuous")$v.pred.1df
> hist(unlist(risk))
> subset <- which(duke.clin$year < 7 & (!is.na(duke.clin$stage)))
> summary(coxph(Surv(duke.clin$year, duke.clin$dead) ~ fit$v.pred.1df,
+   subset = subset))

Call:
coxph(formula = Surv(duke.clin$year, duke.clin$dead) ~ fit$v.pred.1df,
      subset = subset)

n= 82

              coef exp(coef) se(coef)      z Pr(>|z|)
fit$v.pred.1df 0.7444    2.1051  0.3256 2.286  0.0222 *
---
Signif. codes:  0 '***' 0.001 '**' 0.01 '*' 0.05 '.' 0.1 ' ' 1

              exp(coef) exp(-coef) lower .95 upper .95
fit$v.pred.1df    2.105    0.475    1.112    3.985

Rsquare= 0.058 (max possible= 0.979 )
Likelihood ratio test= 4.89 on 1 df,  p=0.02697
Wald test              = 5.23 on 1 df,  p=0.02223
Score (logrank) test = 5.47 on 1 df,  p=0.01939

> surv.fit <- survfit(Surv(duke.clin$year, duke.clin$dead) ~ fit$v.pred.1df,
+   subset = subset)
> print(surv.fit)

Call: survfit(formula = Surv(duke.clin$year, duke.clin$dead) ~ fit$v.pred.1df,
              subset = subset)

              records n.max n.start events median 0.95LCL 0.95UCL
fit$v.pred.1df=1    55    55     55    24    4.62    3.57    NA
fit$v.pred.1df=2    27    27     27    16    2.66    1.88    NA

```

```
> logrank <- survdiff(Surv(duke.clin$year, duke.clin$dead) ~ fit$v.pred.1df,
+ subset = subset)
> logrank
```

Call:

```
survdiff(formula = Surv(duke.clin$year, duke.clin$dead) ~ fit$v.pred.1df,
subset = subset)
```

|                   | N  | Observed | Expected | (O-E) <sup>2</sup> /E | (O-E) <sup>2</sup> /V |
|-------------------|----|----------|----------|-----------------------|-----------------------|
| fit\$v.pred.1df=1 | 55 | 24       | 30.27    | 1.30                  | 5.41                  |
| fit\$v.pred.1df=2 | 27 | 16       | 9.73     | 4.04                  | 5.41                  |

Chisq= 5.4 on 1 degrees of freedom, p= 0.02

```
> pv <- pchisq(logrank$chisq, 1, lower.tail = F)
> cox.fit <- coxph(Surv(duke.clin$year, duke.clin$dead) ~ risk + duke.clin$Histology,
+ subset = subset)
> summary(cox.fit)
```

Call:

```
coxph(formula = Surv(duke.clin$year, duke.clin$dead) ~ risk +
duke.clin$Histology, subset = subset)
```

n= 82

|                              | coef    | exp(coef) | se(coef) | z      | Pr(> z ) |
|------------------------------|---------|-----------|----------|--------|----------|
| risk                         | 0.2909  | 1.3376    | 0.1293   | 2.249  | 0.0245 * |
| duke.clin\$HistologySquamous | -0.4171 | 0.6589    | 0.3583   | -1.164 | 0.2443   |

---  
Signif. codes: 0 '\*\*\*' 0.001 '\*\*' 0.01 '\*' 0.05 '.' 0.1 ' ' 1

|                              | exp(coef) | exp(-coef) | lower .95 | upper .95 |
|------------------------------|-----------|------------|-----------|-----------|
| risk                         | 1.338     | 0.7476     | 1.0381    | 1.724     |
| duke.clin\$HistologySquamous | 0.659     | 1.5176     | 0.3265    | 1.330     |

Rsquare= 0.06 (max possible= 0.979 )

Likelihood ratio test= 5.04 on 2 df, p=0.08054

Wald test = 5.08 on 2 df, p=0.07902

Score (logrank) test = 5.04 on 2 df, p=0.08028

```
> head(duke.clin)
```

|          | Stage | Histology      | death | month | year      | dead | stage |
|----------|-------|----------------|-------|-------|-----------|------|-------|
| GSM70125 | IA    | Squamous       | 0     | 57.8  | 4.8166667 | 0    | 1     |
| GSM70126 | IA    | Squamous       | 0     | 66.0  | 5.5000000 | 0    | 1     |
| GSM70127 | <NA>  | Adenocarcinoma | 0     | 59.8  | 4.9833333 | 0    | NA    |
| GSM70128 | IIB   | Squamous       | 0     | 14.0  | 1.1666667 | 0    | 2     |
| GSM70129 | IIIA  | Adenocarcinoma | 1     | 11.6  | 0.9666667 | 1    | 3     |
| GSM70130 | IA    | Adenocarcinoma | 0     | 34.8  | 2.9000000 | 0    | 1     |



```

> plot(surv.fit, col = 1:2, lty = c(2, 1), xlab = "Year", ylab = "Survival",
+      mark = 20, cex.lab = 1.5, main = "59 genes, FFPE to Bild et al dataset")
> text(2, 0.2, pv.expr(pv), cex = 1.5)

> plot(surv.fit, col = 1:2, lty = c(2, 1), xlab = "Year", ylab = "Survival",
+      mark = 20, cex.lab = 1.5, main = "59 genes, FFPE to Bild et al dataset")
> text(2, 0.2, pv.expr(pv), cex = 1.5)

```

### 59 genes, FFPE to Bild et al dataset

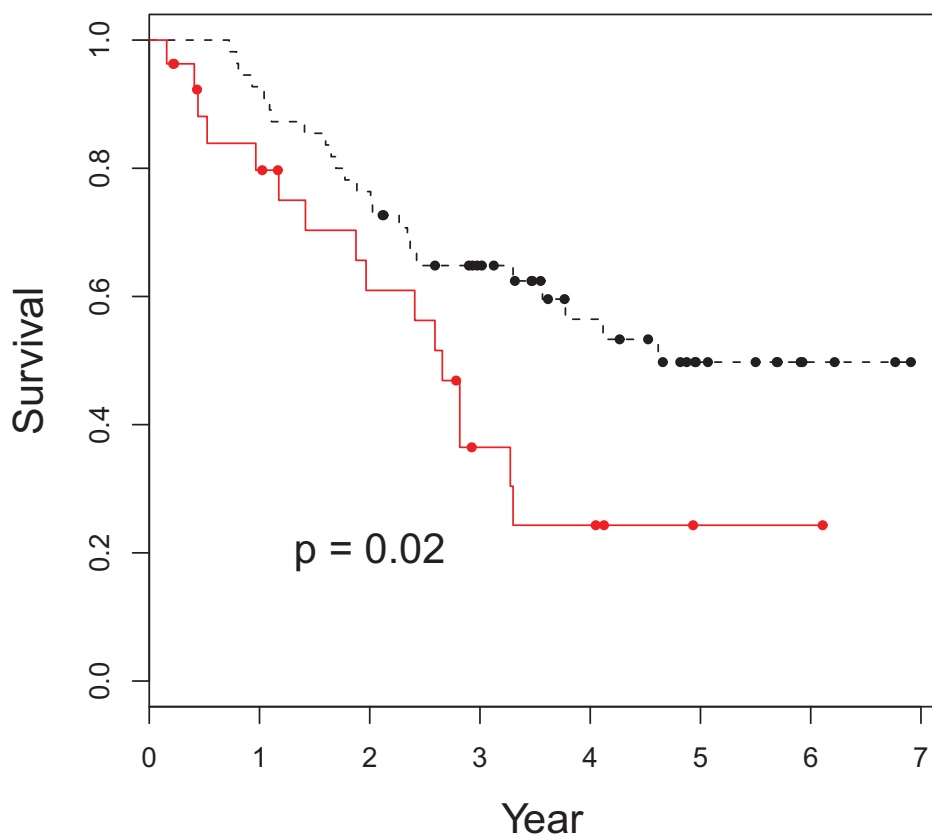

Kaplan Meier plots of survival for high and low risk group in Bild et al dataset predicted from 59-gene signature

Predict the lung cancer stage I patients' survival in Bild et al dataset.

```

> subset <- which(duke.clin$year < 7 & duke.clin$stage == 1)
> surv.fit <- survfit(Surv(duke.clin$year, duke.clin$dead) ~ fit$v.pred.1df,
+ subset = subset)
> print(surv.fit)

```

```
Call: survfit(formula = Surv(duke.clin$year, duke.clin$dead) ~ fit$v.pred.1df,
  subset = subset)
```

|                   | records | n.max | n.start | events | median | 0.95LCL | 0.95UCL |
|-------------------|---------|-------|---------|--------|--------|---------|---------|
| fit\$v.pred.1df=1 | 40      | 40    | 40      | 15     | NA     | 4.12    | NA      |
| fit\$v.pred.1df=2 | 21      | 21    | 21      | 12     | 2.82   | 2.41    | NA      |

```
> logrank <- survdiff(Surv(duke.clin$year, duke.clin$dead) ~ fit$v.pred.1df,
+   subset = subset)
> logrank
```

```
Call:
survdiff(formula = Surv(duke.clin$year, duke.clin$dead) ~ fit$v.pred.1df,
  subset = subset)
```

|                   | N  | Observed | Expected | (O-E)^2/E | (O-E)^2/V |
|-------------------|----|----------|----------|-----------|-----------|
| fit\$v.pred.1df=1 | 40 | 15       | 19.96    | 1.23      | 4.85      |
| fit\$v.pred.1df=2 | 21 | 12       | 7.04     | 3.50      | 4.85      |

Chisq= 4.9 on 1 degrees of freedom, p= 0.0276

```
> pv <- pchisq(logrank$chisq, 1, lower.tail = F)
> table(duke.clin$stage)
```

```
 1  2  3  4
62 16  4  1
```

```
> cox.fit <- coxph(Surv(duke.clin$year, duke.clin$dead) ~ risk + duke.clin$Histology,
+   subset = subset)
> summary(cox.fit)
```

```
Call:
coxph(formula = Surv(duke.clin$year, duke.clin$dead) ~ risk +
  duke.clin$Histology, subset = subset)
```

n= 61

|                              | coef    | exp(coef) | se(coef) | z      | Pr(> z ) |
|------------------------------|---------|-----------|----------|--------|----------|
| risk                         | 0.3059  | 1.3578    | 0.1540   | 1.986  | 0.047 *  |
| duke.clin\$HistologySquamous | -0.4209 | 0.6565    | 0.4554   | -0.924 | 0.355    |

---

Signif. codes: 0 '\*\*\*' 0.001 '\*\*' 0.01 '\*' 0.05 '.' 0.1 ' ' 1

|                              | exp(coef) | exp(-coef) | lower .95 | upper .95 |
|------------------------------|-----------|------------|-----------|-----------|
| risk                         | 1.3578    | 0.7365     | 1.0040    | 1.836     |
| duke.clin\$HistologySquamous | 0.6565    | 1.5233     | 0.2689    | 1.603     |

Rsquare= 0.062 (max possible= 0.961 )

Likelihood ratio test= 3.93 on 2 df, p=0.1405

Wald test = 3.97 on 2 df, p=0.1375

Score (logrank) test = 3.95 on 2 df, p=0.1385

```

> plot(surv.fit, col = 1:2, lty = c(2, 1), xlab = "Year", ylab = "Survival",
+      mark = 20, cex.lab = 1.5, main = "59 genes, FFPE to Bild et al dataset, stage I")
> text(2, 0.2, pv.expr(pv), cex = 1.5)

> plot(surv.fit, col = 1:2, lty = c(2, 1), xlab = "Year", ylab = "Survival",
+      mark = 20, cex.lab = 1.5, main = "59 genes, FFPE to Bild et al dataset, stage I")
> text(2, 0.2, pv.expr(pv), cex = 1.5)

```

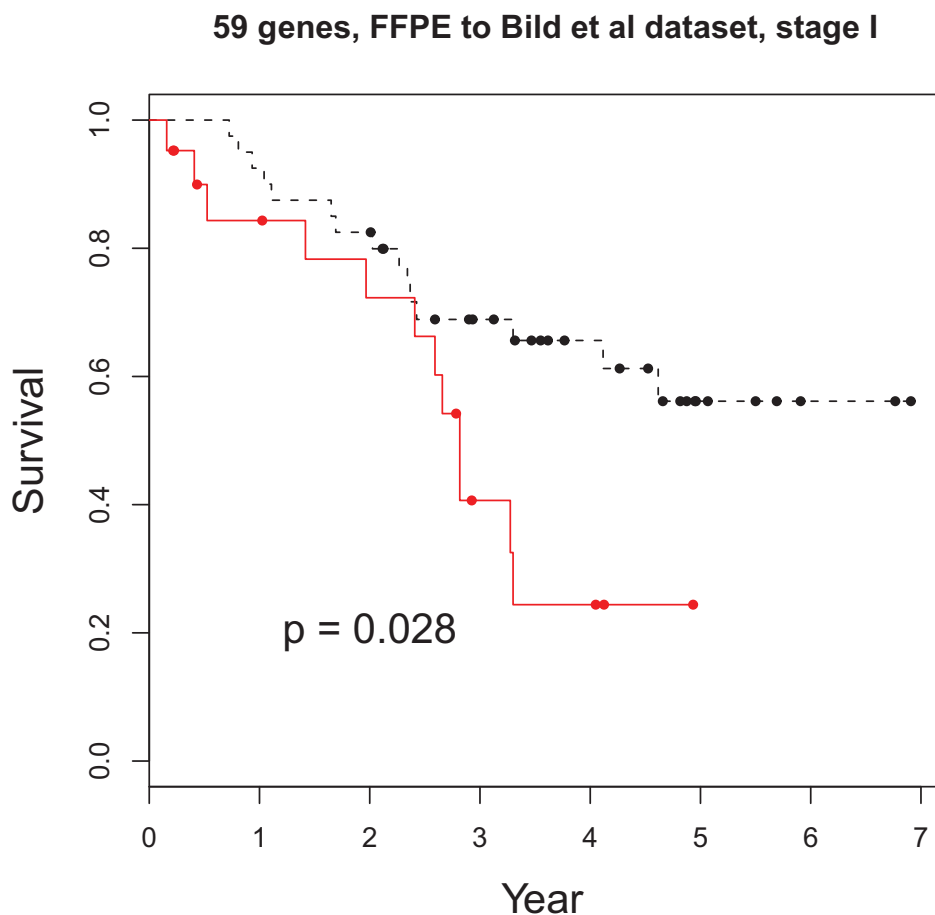

Kaplan Meier plots of survival for high and low risk group of Stage I in Bild et al dataset predicted from 59-gene signature

Build the prediction model using the Consortium data, and predict the lung cancer patients's survival in Bild et al dataset.

```

> beer.clin.dat <- read.csv("Consortium.clin.csv", row.names = 1)
> beer.expr <- read.csv("Consortium.expr.csv", row.names = 1)
> head(beer.clin.dat)

```

|                 | MICROARRAY      | dat.SITE | death | month | year      | GENDER | AGE_AT_DIAGNOSIS |
|-----------------|-----------------|----------|-------|-------|-----------|--------|------------------|
| CL2004110909AA  | CL2004110909AA  | DFCI     | 0     | 110   | 9.1666667 | Female | 55               |
| CL2004111002AA  | CL2004111002AA  | DFCI     | 0     | 98    | 8.1666667 | Female | 41               |
| CL2004111003AA  | CL2004111003AA  | DFCI     | 0     | 110   | 9.1666667 | Male   | 47               |
| CL20041110100AA | CL20041110100AA | DFCI     | 0     | 66    | 5.5000000 | Male   | 73               |
| CL20041110102AA | CL20041110102AA | DFCI     | 1     | 29    | 2.4166667 | Female | 63               |
| CL20041110103AA | CL20041110103AA | DFCI     | 1     | 7     | 0.5833333 | Male   | 72               |

  

|                 | smoking | stage | adj_chemo_YN |
|-----------------|---------|-------|--------------|
| CL2004110909AA  | 1       | 1     | 0            |
| CL2004111002AA  | 1       | 1     | 0            |
| CL2004111003AA  | 1       | 1     | 1            |
| CL20041110100AA | 0       | 1     | NA           |
| CL20041110102AA | 1       | 2     | NA           |
| CL20041110103AA | 0       | 1     | NA           |

```

> beer.clin <- beer.clin.dat[colnames(beer.expr), ]
> which(rownames(beer.clin) != colnames(beer.expr))

integer(0)

> dim(beer.clin)

[1] 442 10

> dim(beer.expr)

[1] 1012 442

> beer.expr <- beer.expr[rownames(g59), ]
> dim(beer.expr)

[1] 59 442

> cb.expr <- data.frame(beer.expr, duke.expr)
> dim(cb.expr)

[1] 59 553

> site <- c(rep("beer", dim(beer.expr)[2]), rep("duke", dim(duke.expr)[2]))
> cb.expr[] <- normalize.quantiles(as.matrix(cb.expr))
> beer.expr <- cb.expr[, site == "beer"]
> duke.expr <- cb.expr[, site != "beer"]

> ind1 <- which(beer.clin$year < 7)
> length(ind1)

[1] 362

> data.train <- list(x = beer.expr[, ind1], y = beer.clin$year[ind1],
+   censoring.status = beer.clin$death[ind1], featurenames = NULL)
> train.obj <- superpc.train(data.train, type = "survival")
> head(duke.clin)

```

```

      Stage      Histology death month      year dead stage
GSM70125    IA      Squamous      0 57.8 4.8166667      0      1
GSM70126    IA      Squamous      0 66.0 5.5000000      0      1
GSM70127 <NA> Adenocarcinoma      0 59.8 4.9833333      0     NA
GSM70128    IIB      Squamous      0 14.0 1.1666667      0      2
GSM70129   IIIA Adenocarcinoma      1 11.6 0.9666667      1      3
GSM70130    IA Adenocarcinoma      0 34.8 2.9000000      0      1

> data.test <- list(x = duke.expr, y = duke.clin$year, censoring.status = duke.clin$dead,
+   featurenames = NULL)
> fit <- superpc.predict(train.obj, data.train, data.test, threshold = 1,
+   prediction.type = "discrete")
> table(fit$v.pred.1df)

 1  2
38 73

> subset <- which(duke.clin$year < 7 & (!is.na(duke.clin$stage)))
> length(subset)

[1] 82

> surv.fit <- survfit(Surv(duke.clin$year, duke.clin$dead) ~ fit$v.pred.1df,
+   subset = subset)
> print(surv.fit)

Call: survfit(formula = Surv(duke.clin$year, duke.clin$dead) ~ fit$v.pred.1df,
  subset = subset)

              records n.max n.start events median 0.95LCL 0.95UCL
fit$v.pred.1df=1     32    32     32    13   4.62    3.30     NA
fit$v.pred.1df=2     50    50     50    27   2.82    2.41     NA

> logrank <- survdiff(Surv(duke.clin$year, duke.clin$dead) ~ fit$v.pred.1df,
+   subset = subset)
> logrank

Call:
survdiff(formula = Surv(duke.clin$year, duke.clin$dead) ~ fit$v.pred.1df,
  subset = subset)

              N Observed Expected (O-E)^2/E (O-E)^2/V
fit$v.pred.1df=1 32      13     17.3    1.080    1.91
fit$v.pred.1df=2 50      27     22.7    0.825    1.91

Chisq= 1.9 on 1 degrees of freedom, p= 0.167

> pv <- pchisq(logrank$chisq, 1, lower.tail = F)
> cox.fit <- coxph(Surv(duke.clin$year, duke.clin$dead) ~ fit$v.pred.1df +
+   duke.clin$stage, subset = subset)
> summary(cox.fit)

```

```

Call:
coxph(formula = Surv(duke.clin$year, duke.clin$dead) ~ fit$v.pred.1df +
      duke.clin$stage, subset = subset)

n= 82

              coef exp(coef) se(coef)      z Pr(>|z|)
fit$v.pred.1df 0.3449   1.4118   0.3426 1.007  0.3141
duke.clin$stage 0.5636   1.7569   0.2559 2.202  0.0276 *
---
Signif. codes:  0 '***' 0.001 '**' 0.01 '*' 0.05 '.' 0.1 ' ' 1

              exp(coef) exp(-coef) lower .95 upper .95
fit$v.pred.1df      1.412     0.7083     0.7214     2.763
duke.clin$stage     1.757     0.5692     1.0640     2.901

Rsquare= 0.073 (max possible= 0.979 )
Likelihood ratio test= 6.21 on 2 df,  p=0.04477
Wald test              = 6.77 on 2 df,  p=0.0339
Score (logrank) test = 7.1 on 2 df,  p=0.02878

> gc()

              used (Mb) gc trigger (Mb) max used (Mb)
Ncells 380760 10.2   984024 26.3   984024 26.3
Vcells 483253  3.7   29563329 225.6 36937229 281.9

> plot(surv.fit, col = 1:2, lty = c(2, 1), xlab = "Year", ylab = "Survival",
+      mark = 20, cex.lab = 1.5, main = "59 genes, \nConsortium to Bild et al dataset")
> text(2, 0.2, pv.expr(pv), cex = 1.5)

> plot(surv.fit, col = 1:2, lty = c(2, 1), xlab = "Year", ylab = "Survival",
+      mark = 20, cex.lab = 1.5, main = "59 genes, \nConsortium to Bild et al dataset")
> text(2, 0.2, pv.expr(pv), cex = 1.5)

```

**59 genes,  
Consortium to Bild et al dataset**

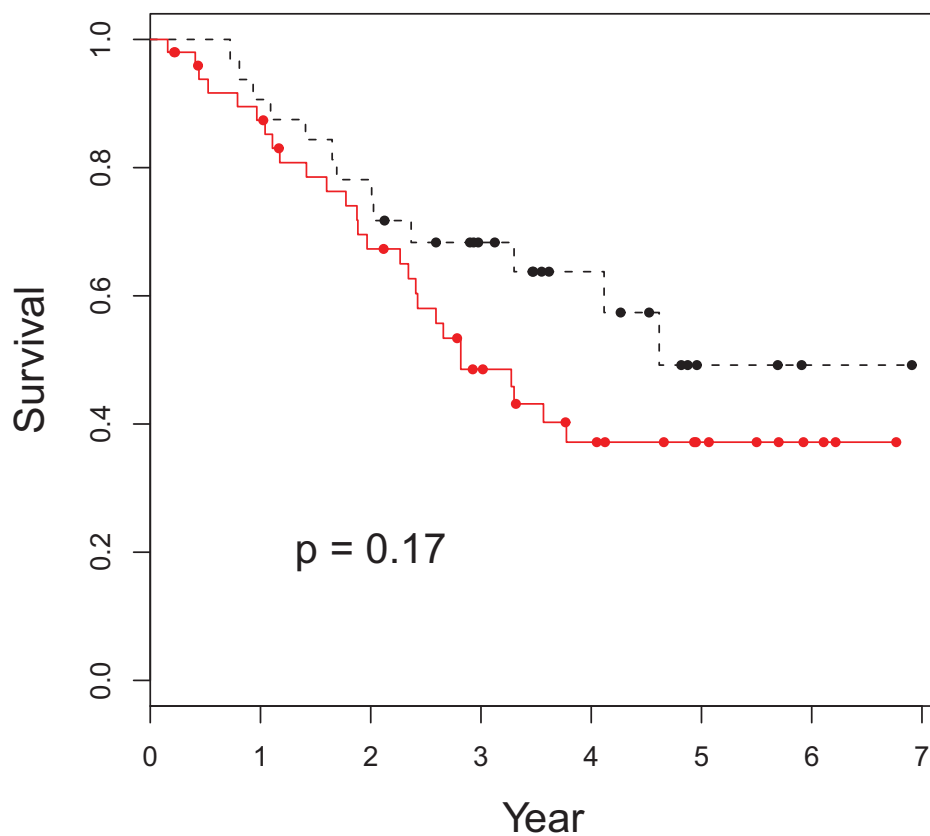

Kaplan Meier Plot of survival for the high and low risk groups in Bild et al dataset, predicted from the 59 gene-signature.

Now predict the stage I patients only.

```
> subset <- which(duke.clin$year < 7 & duke.clin$stage == 1)
> length(subset)
```

```
[1] 61
```

```
> surv.fit <- survfit(Surv(duke.clin$year, duke.clin$dead) ~ fit$v.pred.1df,
+ subset = subset)
> print(surv.fit)
```

```
Call: survfit(formula = Surv(duke.clin$year, duke.clin$dead) ~ fit$v.pred.1df,
subset = subset)
```

```
records n.max n.start events median 0.95LCL 0.95UCL
```

```

fit$v.pred.1df=1      27    27    27    10    NA    4.12    NA
fit$v.pred.1df=2      34    34    34    17    2.82    2.43    NA

> logrank <- survdiff(Surv(duke.clin$year, duke.clin$dead) ~ fit$v.pred.1df,
+   subset = subset)
> logrank

Call:
survdiff(formula = Surv(duke.clin$year, duke.clin$dead) ~ fit$v.pred.1df,
  subset = subset)

              N Observed Expected (O-E)^2/E (O-E)^2/V
fit$v.pred.1df=1 27         10     13.5     0.886     1.78
fit$v.pred.1df=2 34         17     13.5     0.880     1.78

Chisq= 1.8 on 1 degrees of freedom, p= 0.182

> pv <- pchisq(logrank$chisq, 1, lower.tail = F)
> gc()

              used (Mb) gc trigger (Mb) max used (Mb)
Ncells 380654 10.2   984024 26.3   984024 26.3
Vcells 483180  3.7   23650663 180.5 36937229 281.9

> plot(surv.fit, col = 1:2, lty = c(2, 1), xlab = "Year", ylab = "Survival",
+   mark = 20, cex.lab = 1.5, main = "59 genes, \nConsortium to Bild et al dataset, Stage I")
> text(2, 0.2, pv.expr(pv), cex = 1.5)

> plot(surv.fit, col = 1:2, lty = c(2, 1), xlab = "Year", ylab = "Survival",
+   mark = 20, cex.lab = 1.5, main = "59 genes, \nConsortium to Bild et al dataset, Stage I")
> text(2, 0.2, pv.expr(pv), cex = 1.5)

```



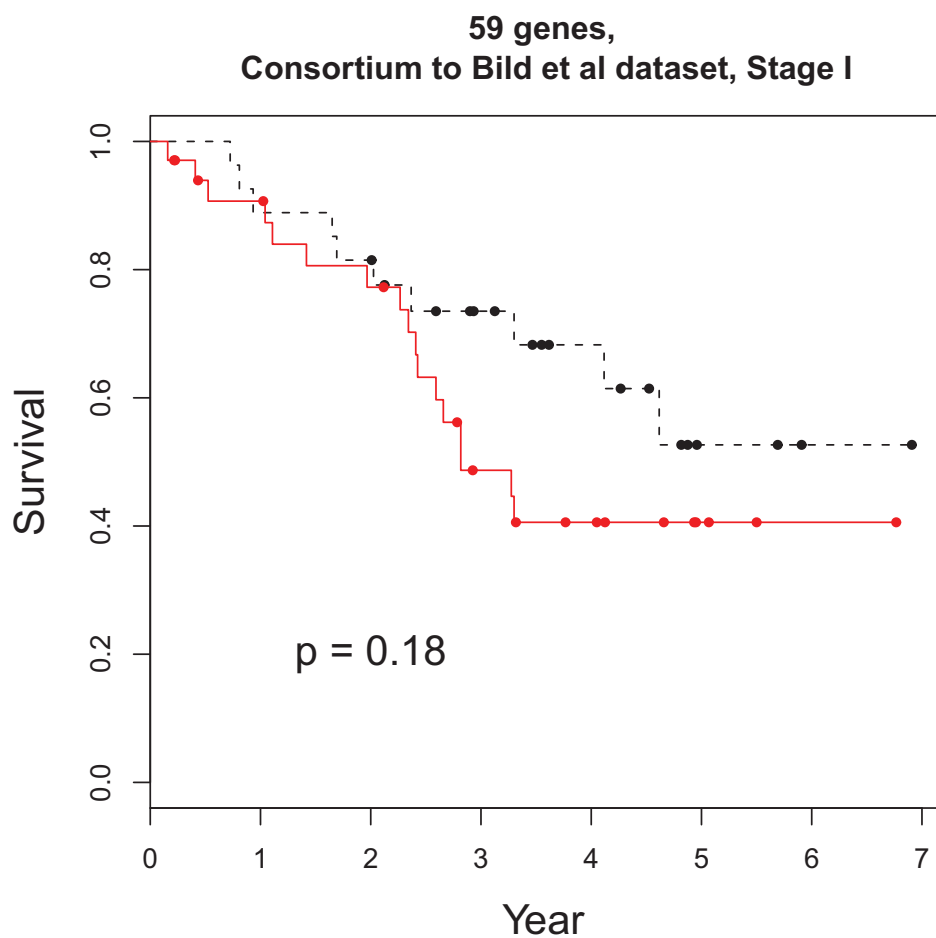

Kaplan Meier plots of survival for high and low risk group of stage I patients in Bild et al dataset predicted from 59-gene signature

## 5 Appendix

This computation was performed in the following environment:

```
> sessionInfo()
```

```
R version 2.10.0 (2009-10-26)
```

```
i386-pc-mingw32
```

```
locale:
```

```
[1] LC_COLLATE=English_United States.1252 LC_CTYPE=English_United States.1252
```

```
[3] LC_MONETARY=English_United States.1252 LC_NUMERIC=C
```

```
[5] LC_TIME=English_United States.1252
```

attached base packages:

[1] splines stats graphics grDevices utils datasets methods base

other attached packages:

[1] preprocessCore\_1.8.0 affy\_1.24.2 Biobase\_2.6.1 superpc\_1.06

[5] survival\_2.35-8

loaded via a namespace (and not attached):

[1] affyio\_1.14.0
