# Supplementary material for: Robust Gene Expression Signature from Formalin-Fixed Paraffin-Embedded Samples Predicts Prognosis of Non–Small-Cell Lung Cancer Patients
Source: Oxford University Press journal article supplement (doi:10.1158/1078-0432.ccr-11-0196), 2011-07-08
Supplement: 10780432ccr110196-sup-t7_pdf_153k.pdf [file 10780432ccr110196-sup-t7_pdf_153k.pdf]

**Supplementary Table 1.** The characteristics of patients from MDACC

| Feature                 | Cohort<br>(n=75) | Cohort<br>(n=55) |
|-------------------------|------------------|------------------|
| Age (y)                 |                  |                  |
| Median                  | 65               | 65               |
| Range                   | 32 - 82          | 32 - 76          |
| Mean                    | 64.2             | 63.6             |
| Gender                  |                  |                  |
| Female                  | 27               | 17               |
| Male                    | 48               | 38               |
| Race                    |                  |                  |
| Caucasian               | 71               | 53               |
| Hispanic                | 1                | 0                |
| Black                   | 2                | 2                |
| Asian                   | 1                | 0                |
| TNM Stage               |                  |                  |
| I                       | 34               | 24               |
| II                      | 19               | 14               |
| III                     | 22               | 17               |
| Histology type          |                  |                  |
| Adenocarcinomas         | 48               | 30               |
| Squamous cell carcinoma | 27               | 25               |
| Smoking history         |                  |                  |
| No                      | 7                | 2                |
| Yes                     | 68               | 53               |
| Adjuvant chemotherapy   |                  |                  |
| No                      | 28               | 21               |
| Yes                     | 47               | 34               |
| Follow-up times (y)     |                  |                  |
| Median                  | 2.76             | 2.74             |
| Range                   | 0.24 – 6.9       | 0.24 – 6.9       |
| Mean                    | 2.79             | 2.8              |

Abbreviations: TNM, tumor size, node involvement, metastasis status.

**Supplementary Table 2.** The summary of all the training and testing sets, the P-values of log-rank tests between the predicted high and low risk groups for all the prediction models derived and validated in this study. Six prediction models were developed and tested in this project. Model 3 and 5 are prediction models developed from FFPE samples based on 1400 genes and 59 genes respectively. Models 1, 2, 4 and 6 were used to demonstrate the robustness of the genes derived from FFPE samples. 1012 features in Model 2 and 4 are a subset of 1400 robust genes and the difference is due to the microarray platform difference between the MDACC study (Affymetrix U133 plus 2.0) and the consortium study (Affymetrix U133 A).

| Figure | Training                    | Testing                                   | P-value | Model (# of features in the model) |
|--------|-----------------------------|-------------------------------------------|---------|------------------------------------|
| 3A     | FFPE training (N=25)        | FFPE testing (N=30)                       | 0.013   | 1 (1400)                           |
| 3B     | Consortium training (N=254) | Consortium testing (N=157)                | 0.00014 | 2 (1012)                           |
| 3C     | FFPE (N = 55)               | Consortium (N=442)                        | 5.4E-7  | 3 (1400)                           |
| 3D     | Consortium (N=442)          | FFPE (N = 55)                             | 0.068   | 4 (1012)                           |
| 3E     | FFPE (N = 55)               | Consortium stage I (N=215)                | 0.036   | 3 (1400)                           |
| 3F     | FFPE (N = 55)               | Consortium stage II (N=82)                | 0.022   | 3 (1400)                           |
| 3G     | FFPE (N = 55)               | Consortium stage III (N=64)               | 0.021   | 3 (1400)                           |
| 5A     | FFPE (N = 55)               | <i>Bhattacharjee et al</i> (N=117)        | 0.016   | 5 (59)                             |
| 5B     | FFPE (N = 55)               | <i>Bhattacharjee et al</i> stage I (N=70) | 0.039   | 5 (59)                             |
| 5C     | FFPE (N = 55)               | <i>Bild et al</i> (N=111)                 | 0.02    | 5 (59)                             |
| 5D     | FFPE (N = 55)               | <i>Bild et al</i> stage I(N=62)           | 0.028   | 5 (59)                             |
| S2A    | FFPE (N = 55)               | MSKCC (N= 93)                             | 0.0093  | 3 (1400)                           |
| S2B    | FFPE (N = 55)               | DFCI (N= 64)                              | 0.0076  | 3 (1400)                           |
| S2C    | FFPE (N = 55)               | MI (N= 133)                               | 0.0011  | 3 (1400)                           |
| S2D    | FFPE (N = 55)               | HLM (N= 69)                               | 0.40    | 3 (1400)                           |
| S3A    | FFPE (N = 55)               | Consortium with chemo (N=89)              | 0.015   | 3 (1400)                           |
| S3B    | FFPE (N = 55))              | Consortium without chemo (N=233)          | 0.00062 | 3 (1400)                           |
| S4A    | Consortium (N=442)          | <i>Bhattacharjee et al</i> (N=117)        | 0.0052  | 6 (59)                             |
| S4B    | Consortium (N=442)          | <i>Bhattacharjee et al</i> stage I (N=70) | 0.087   | 6 (59)                             |
| S4C    | Consortium (N=442)          | <i>Bild et al</i> (N=111)                 | 0.17    | 6 (59)                             |
| S4D    | Consortium (N=442)          | <i>Bild et al</i> (N=62)                  | 0.18    | 6 (59)                             |

**Supplementary Table 3.** The association between patients' characteristics and RGS groups defined from unsupervised clustering analysis for MDACC patients. P-values for age is based on Wilcoxon test and for other categorical variables are based on Fisher's exact test.

| <b>Characteristics</b>  | <b>Group 1</b> | <b>Group 2</b> | <b>p-value</b> |
|-------------------------|----------------|----------------|----------------|
| Age (median)            | 65             | 65             | 0.47           |
| Male                    | 21 (75%)       | 17 (63%)       | 0.57           |
| Current Smoker          | 17 (61%)       | 12 (44%)       | 0.22           |
| Stage                   |                |                |                |
| I                       | 10 (36%)       | 14 (52%)       | 0.51           |
| II                      | 8 (28%)        | 6 (22%)        |                |
| III                     | 10 (36%)       | 7 (26%)        |                |
| Histology               |                |                |                |
| Adenocarcinoma          | 5 (18%)        | 25 (93%)       | 1.3E-8         |
| Squamous Cell Carcinoma | 23 (82%)       | 2 (7%)         |                |
| Adjuvant Chemotherapy   | 14 (50%)       | 20 (74%)       | 0.10           |

**Supplementary Table 4.** The top gene sets enriched for RGS group 1 and group2 based on gene set enrichment analysis.

### Enriched in group 1

|    | GS<br>follow link to MSigDB                  | GS DETAILS                 | SIZE | ES   | NES  | NOM p-val | FDR q-val | FWER p-val | RANK AT MAX | LEADING EDGE                   |
|----|----------------------------------------------|----------------------------|------|------|------|-----------|-----------|------------|-------------|--------------------------------|
| 1  | <a href="#">BRCA_ER_NEG</a>                  | <a href="#">Details...</a> | 82   | 0.55 | 2.12 | 0.000     | 0.003     | 0.003      | 243         | tags=49%, list=20%, signal=57% |
| 2  | <a href="#">PENG_LEUCINE_DN</a>              | <a href="#">Details...</a> | 23   | 0.67 | 2.00 | 0.000     | 0.007     | 0.015      | 240         | tags=52%, list=19%, signal=63% |
| 3  | <a href="#">LI_FETAL_VS_WT_KIDNEY_DN</a>     | <a href="#">Details...</a> | 15   | 0.76 | 1.99 | 0.000     | 0.005     | 0.016      | 172         | tags=67%, list=14%, signal=76% |
| 4  | <a href="#">PRMT5_KD_UP</a>                  | <a href="#">Details...</a> | 31   | 0.62 | 1.94 | 0.000     | 0.009     | 0.036      | 159         | tags=42%, list=13%, signal=47% |
| 5  | <a href="#">HOFFMANN_BIVSBII_BI_TABLE2</a>   | <a href="#">Details...</a> | 19   | 0.66 | 1.87 | 0.000     | 0.017     | 0.085      | 161         | tags=47%, list=13%, signal=54% |
| 6  | <a href="#">ELONGINA_KO_DN</a>               | <a href="#">Details...</a> | 28   | 0.61 | 1.85 | 0.000     | 0.019     | 0.112      | 141         | tags=39%, list=11%, signal=43% |
| 7  | <a href="#">TARTE_PLASMA_BLASTIC</a>         | <a href="#">Details...</a> | 50   | 0.52 | 1.82 | 0.000     | 0.027     | 0.177      | 338         | tags=56%, list=27%, signal=74% |
| 8  | <a href="#">CIS_XPC_UP</a>                   | <a href="#">Details...</a> | 16   | 0.66 | 1.80 | 0.000     | 0.030     | 0.225      | 81          | tags=38%, list=7%, signal=40%  |
| 9  | <a href="#">PENG_GlutAMINE_DN</a>            | <a href="#">Details...</a> | 39   | 0.54 | 1.79 | 0.000     | 0.028     | 0.233      | 257         | tags=46%, list=21%, signal=56% |
| 10 | <a href="#">HSA04110_CELL_CYCLE</a>          | <a href="#">Details...</a> | 15   | 0.68 | 1.77 | 0.002     | 0.032     | 0.286      | 252         | tags=53%, list=20%, signal=66% |
| 11 | <a href="#">STEMCELL_NEURAL_UP</a>           | <a href="#">Details...</a> | 314  | 0.38 | 1.73 | 0.000     | 0.044     | 0.408      | 344         | tags=40%, list=28%, signal=41% |
| 12 | <a href="#">STEMCELL_EMBRYONIC_UP</a>        | <a href="#">Details...</a> | 226  | 0.39 | 1.72 | 0.000     | 0.046     | 0.449      | 313         | tags=36%, list=25%, signal=40% |
| 13 | <a href="#">HCC_SURVIVAL_GOOD_VS_POOR_DN</a> | <a href="#">Details...</a> | 40   | 0.49 | 1.62 | 0.006     | 0.107     | 0.778      | 275         | tags=43%, list=22%, signal=53% |
| 14 | <a href="#">SERUM_FIBROBLAST_CORE_UP</a>     | <a href="#">Details...</a> | 22   | 0.54 | 1.60 | 0.021     | 0.119     | 0.838      | 243         | tags=55%, list=20%, signal=67% |
| 15 | <a href="#">MOREAUX_TACI_HI_VS_LOW_DN</a>    | <a href="#">Details...</a> | 24   | 0.54 | 1.57 | 0.029     | 0.146     | 0.904      | 252         | tags=50%, list=20%, signal=61% |

### Enriched in group 2

|    | GS<br>follow link to MSigDB              | GS DETAILS                 | SIZE | ES    | NES   | NOM p-val | FDR q-val | FWER p-val | RANK AT MAX | LEADING EDGE                   |
|----|------------------------------------------|----------------------------|------|-------|-------|-----------|-----------|------------|-------------|--------------------------------|
| 1  | <a href="#">LI_FETAL_VS_WT_KIDNEY_UP</a> | <a href="#">Details...</a> | 24   | -0.74 | -2.25 | 0.000     | 0.000     | 0.000      | 138         | tags=46%, list=11%, signal=51% |
| 2  | <a href="#">BRCA_ER_POS</a>              | <a href="#">Details...</a> | 53   | -0.53 | -1.94 | 0.000     | 0.035     | 0.062      | 197         | tags=40%, list=16%, signal=45% |
| 3  | <a href="#">TAKEDA_NUP8_HOXA9_8D_DN</a>  | <a href="#">Details...</a> | 19   | -0.65 | -1.88 | 0.004     | 0.054     | 0.140      | 116         | tags=37%, list=9%, signal=40%  |
| 4  | <a href="#">SERUM_FIBROBLAST_CORE_DN</a> | <a href="#">Details...</a> | 27   | -0.57 | -1.73 | 0.012     | 0.173     | 0.482      | 188         | tags=41%, list=15%, signal=47% |
| 5  | <a href="#">PENG_RAPAMYCIN_UP</a>        | <a href="#">Details...</a> | 19   | -0.60 | -1.71 | 0.006     | 0.168     | 0.548      | 388         | tags=68%, list=31%, signal=98% |
| 6  | <a href="#">UEDA_MOUSE_LIVER</a>         | <a href="#">Details...</a> | 15   | -0.63 | -1.70 | 0.013     | 0.153     | 0.581      | 310         | tags=53%, list=25%, signal=70% |
| 7  | <a href="#">AGEING_KIDNEY_UP</a>         | <a href="#">Details...</a> | 42   | -0.48 | -1.64 | 0.000     | 0.210     | 0.742      | 181         | tags=31%, list=15%, signal=35% |
| 8  | <a href="#">HSC_MATURE_FETAL</a>         | <a href="#">Details...</a> | 38   | -0.47 | -1.60 | 0.019     | 0.266     | 0.860      | 210         | tags=29%, list=17%, signal=34% |
| 9  | <a href="#">IRITANI_ADPROX_VASC</a>      | <a href="#">Details...</a> | 16   | -0.59 | -1.59 | 0.036     | 0.243     | 0.869      | 242         | tags=50%, list=19%, signal=61% |
| 10 | <a href="#">TAKEDA_NUP8_HOXA9_3D_UP</a>  | <a href="#">Details...</a> | 20   | -0.54 | -1.59 | 0.029     | 0.226     | 0.874      | 121         | tags=30%, list=10%, signal=33% |
| 11 | <a href="#">HSC_MATURE_SHARED</a>        | <a href="#">Details...</a> | 31   | -0.49 | -1.59 | 0.013     | 0.211     | 0.882      | 208         | tags=29%, list=17%, signal=34% |
| 12 | <a href="#">TPA_SENS_MIDDLE_DN</a>       | <a href="#">Details...</a> | 26   | -0.51 | -1.57 | 0.022     | 0.213     | 0.904      | 235         | tags=42%, list=19%, signal=51% |

**Supplementary Table 5. 59-genes and the association with survival in both FFPE and Consortium set.**

| <b>Acession</b> | <b>Symbol</b> | <b>Hazard Ratio from FFPE set</b> | <b>p-value from FFPE set</b> | <b>Hazard Ratio from consortium set</b> | <b>p-value from consortium set</b> |
|-----------------|---------------|-----------------------------------|------------------------------|-----------------------------------------|------------------------------------|
| NM_002107       | H3F3A         | 0.30                              | 0.034                        | 0.57                                    | 0.019                              |
| NM_031263       | HNRNPK        | 3.23                              | 0.018                        | 1.73                                    | 0.019                              |
| NM_002156       | HSPD1         | 2.23                              | 0.010                        | 1.82                                    | 0.000                              |
| NM_003472       | DEK           | 3.89                              | 0.005                        | 1.43                                    | 0.004                              |
| NM_016587       | CBX3          | 3.17                              | 0.002                        | 1.78                                    | 0.000                              |
| NM_173638       | NBPF15        | 0.19                              | 0.008                        | 0.53                                    | 0.001                              |
| NM_001677       | ATP1B1        | 0.61                              | 0.023                        | 0.87                                    | 0.028                              |
| NM_005003       | NDUFAB1       | 1.99                              | 0.017                        | 1.57                                    | 0.008                              |
| NM_005124       | NUP153        | 4.93                              | 0.012                        | 1.52                                    | 0.006                              |
| NM_004390       | CTSH          | 0.57                              | 0.017                        | 0.69                                    | 0.000                              |
| NM_014736       | KIAA0101      | 2.04                              | 0.011                        | 1.47                                    | 0.000                              |
| NM_000935       | PLOD2         | 1.82                              | 0.019                        | 1.22                                    | 0.000                              |
| NM_012322       | LSM5          | 4.64                              | 0.000                        | 1.90                                    | 0.000                              |
| NM_002485       | NBN           | 3.39                              | 0.030                        | 1.45                                    | 0.012                              |
| NM_002453       | MTIF2         | 2.11                              | 0.046                        | 1.42                                    | 0.021                              |
| NM_002789       | PSMA4         | 3.34                              | 0.022                        | 1.31                                    | 0.049                              |
| NM_004607       | TBCA          | 3.56                              | 0.026                        | 1.60                                    | 0.004                              |
| NM_006660       | CLPX          | 4.05                              | 0.017                        | 1.74                                    | 0.000                              |
| NM_002137       | HNRNPA2B1     | 2.25                              | 0.023                        | 1.83                                    | 0.009                              |
| NM_001918       | DBT           | 0.25                              | 0.031                        | 0.65                                    | 0.001                              |
| NM_003096       | SNRPG         | 2.35                              | 0.019                        | 1.67                                    | 0.000                              |
| NM_003090       | SNRPA1        | 1.95                              | 0.035                        | 1.52                                    | 0.003                              |
| NM_030881       | DDX17         | 0.17                              | 0.001                        | 0.48                                    | 0.000                              |
| NM_007208       | MRPL3         | 2.43                              | 0.015                        | 1.42                                    | 0.006                              |
| NM_002129       | HMGB2         | 1.89                              | 0.025                        | 1.33                                    | 0.001                              |
| NM_018947       | CYCS          | 2.58                              | 0.027                        | 2.04                                    | 0.000                              |
| NM_005596       | NFIB          | 0.49                              | 0.013                        | 0.75                                    | 0.001                              |
| NM_007100       | ATP5I         | 2.20                              | 0.037                        | 1.52                                    | 0.016                              |
| NM_015149       | RGL1          | 0.44                              | 0.023                        | 0.69                                    | 0.000                              |
| NM_170662       | CBLB          | 0.42                              | 0.004                        | 0.79                                    | 0.036                              |
| AL136621        | ZMYM2         | 0.44                              | 0.009                        | 0.56                                    | 0.016                              |
| NM_006082       | TUBA1B        | 2.44                              | 0.047                        | 1.63                                    | 0.005                              |
| NM_000712       | BLVRA         | 0.32                              | 0.040                        | 0.73                                    | 0.017                              |
| NM_033551       | LARP1         | 4.72                              | 0.018                        | 1.82                                    | 0.001                              |
| NM_015335       | MED13L        | 0.41                              | 0.036                        | 0.78                                    | 0.037                              |
| AK057191        | IDS           | 0.42                              | 0.032                        | 0.77                                    | 0.015                              |
| NM_002076       | GNS           | 0.44                              | 0.017                        | 0.68                                    | 0.009                              |
| NM_005177       | ATP6V0A1      | 0.27                              | 0.015                        | 0.60                                    | 0.001                              |
| NM_015962       | FCF1          | 3.18                              | 0.007                        | 1.34                                    | 0.043                              |
| NM_033450       | ABCC10        | 0.28                              | 0.025                        | 0.66                                    | 0.001                              |
| NM_198843       | SFTPB         | 0.68                              | 0.013                        | 0.85                                    | 0.000                              |
| NM_001037637    | BTF3          | 2.74                              | 0.047                        | 1.39                                    | 0.020                              |
| NM_148923       | CYB5A         | 0.49                              | 0.010                        | 0.79                                    | 0.000                              |

|                     |                 |      |       |      |       |
|---------------------|-----------------|------|-------|------|-------|
| <b>NM_016061</b>    | <b>YPEL5</b>    | 0.23 | 0.013 | 0.66 | 0.004 |
| <b>NM_016021</b>    | <b>UBE2J1</b>   | 0.26 | 0.041 | 0.76 | 0.044 |
| <b>NM_014056</b>    | <b>HIGD1A</b>   | 3.24 | 0.009 | 1.36 | 0.026 |
| <b>NM_016359</b>    | <b>NUSAP1</b>   | 2.00 | 0.037 | 1.31 | 0.000 |
| <b>NM_021825</b>    | <b>CCDC90B</b>  | 3.17 | 0.018 | 1.28 | 0.010 |
| <b>NM_014167</b>    | <b>CCDC59</b>   | 2.55 | 0.039 | 1.67 | 0.000 |
| <b>NM_013341</b>    | <b>OLA1</b>     | 5.07 | 0.001 | 1.58 | 0.000 |
| <b>NM_030793</b>    | <b>FBXO38</b>   | 0.39 | 0.021 | 0.72 | 0.011 |
| <b>NM_003677</b>    | <b>DENR</b>     | 3.55 | 0.011 | 1.34 | 0.041 |
| <b>NM_144567</b>    | <b>ANGEL2</b>   | 0.18 | 0.004 | 0.69 | 0.011 |
| <b>CR601845</b>     | <b>N4BP2L2</b>  | 0.40 | 0.009 | 0.73 | 0.003 |
| <b>NM_182746</b>    | <b>MCM4</b>     | 2.72 | 0.001 | 1.37 | 0.000 |
| <b>NM_001991</b>    | <b>EZH1</b>     | 0.31 | 0.034 | 0.45 | 0.000 |
| <b>NM_015349</b>    | <b>KIAA0240</b> | 0.57 | 0.049 | 0.54 | 0.000 |
| <b>NM_001040455</b> | <b>SIDT2</b>    | 0.41 | 0.015 | 0.74 | 0.031 |
| <b>NM_001012339</b> | <b>DNAJC21</b>  | 0.20 | 0.034 | 0.27 | 0.001 |

**Supplementary Table 6.** The association between patients' characteristics and 59-gene signature and survival time for stage I patients from Bild et al study and Bhattacharjee et al study based on multivariate Cox regression model. In the left panel, 59-gene signature scores were calculated from the prediction model built from MDACC FFPE samples; in the right panel, 59-gene signature scores were calculated from the prediction model built from the consortium frozen samples.

| Variables                                             | MDACC FFPE samples used as the training set |         | Consortium frozen samples used as the training set |         |
|-------------------------------------------------------|---------------------------------------------|---------|----------------------------------------------------|---------|
|                                                       | HR (95% CI)                                 | p-value | HR (95% CI)                                        | p-value |
| <b>Bild et al dataset as the testing set</b>          |                                             |         |                                                    |         |
| Risk Scores                                           | 1.55 (1.05, 2.30)                           | 0.027   | 3.43 (0.99, 11.87)                                 | 0.051   |
| Gender (Male vs. Female)                              | 1.30 (0.65, 2.63)                           | 0.46    | 1.32 (0.65, 2.68)                                  | 0.45    |
| Smoking                                               | 1.00 (0.99, 1.01)                           | 0.92    | 1.00 (0.99, 1.01)                                  | 0.82    |
| <b>Bhattacharjee et al dataset as the testing set</b> |                                             |         |                                                    |         |
| Risk Scores                                           | 1.36 (1.00, 1.84)                           | 0.047   | 3.05 (0.94, 9.89)                                  | 0.064   |
| Histology                                             | 0.66 (0.27, 1.60)                           | 0.36    | 0.66 (0.26, 1.65)                                  | 0.37    |

**Supplementary Table 7.** The risk formula for 59-gene signature developed from FFPE samples. The table gives the U matrix for the singular value decomposition (SVD) analysis and the corresponding coefficients are -2.45, 0.75 and 0.43.

|             | Component 1 | Component 2 | Component 3 |
|-------------|-------------|-------------|-------------|
| 200080_s_at | 0.05        | -0.02       | -0.08       |
| 200807_s_at | -0.13       | 0.03        | -0.15       |
| 200934_at   | -0.10       | -0.05       | -0.03       |
| 201091_s_at | -0.11       | 0.06        | -0.06       |
| 201103_x_at | 0.08        | -0.05       | 0.01        |
| 201242_s_at | 0.15        | 0.13        | -0.23       |
| 202077_at   | -0.05       | -0.02       | 0.02        |
| 202295_s_at | 0.29        | 0.12        | 0.26        |
| 202503_s_at | -0.24       | 0.30        | 0.08        |
| 202620_s_at | -0.15       | 0.28        | 0.66        |
| 202904_s_at | -0.18       | -0.11       | -0.06       |
| 203396_at   | -0.11       | 0.06        | -0.04       |
| 204809_at   | -0.14       | 0.22        | -0.10       |
| 205292_s_at | -0.04       | -0.15       | -0.06       |
| 205370_x_at | 0.06        | -0.08       | -0.01       |
| 205644_s_at | -0.13       | 0.07        | -0.03       |
| 206055_s_at | -0.15       | 0.17        | 0.13        |
| 208718_at   | 0.11        | 0.02        | 0.13        |
| 208808_s_at | -0.14       | -0.05       | 0.07        |
| 209289_at   | 0.16        | -0.19       | 0.20        |
| 209492_x_at | -0.04       | -0.03       | -0.11       |
| 209568_s_at | 0.14        | -0.25       | 0.06        |
| 209682_at   | 0.11        | -0.15       | 0.30        |
| 210282_at   | 0.08        | 0.22        | -0.03       |
| 212208_at   | 0.06        | 0.02        | -0.02       |
| 212221_x_at | 0.08        | -0.10       | 0.11        |
| 212334_at   | 0.15        | 0.08        | 0.14        |
| 212383_at   | 0.10        | -0.18       | 0.01        |
| 212499_s_at | -0.07       | 0.00        | -0.04       |
| 213485_s_at | 0.01        | -0.08       | -0.09       |
| 213936_x_at | 0.45        | 0.56        | -0.16       |
| 215726_s_at | 0.23        | 0.09        | -0.28       |
| 217783_s_at | 0.10        | -0.05       | 0.00        |
| 217845_x_at | -0.04       | 0.09        | -0.02       |
| 218039_at   | -0.24       | -0.09       | -0.10       |
| 219293_s_at | -0.09       | 0.01        | 0.01        |
| 221257_x_at | 0.18        | -0.20       | -0.04       |
| 221825_at   | 0.08        | -0.08       | -0.08       |
| 221899_at   | 0.17        | -0.09       | 0.01        |
| 222036_s_at | -0.26       | 0.06        | -0.15       |
| 38892_at    | 0.17        | -0.18       | 0.07        |
| 56256_at    | 0.10        | -0.04       | 0.07        |
